# Supplementary material for: Polyisoprenylated benzophenone derivatives from Garcinia cambogia and their anti-inflammatory activities
Source: Royal Society of Chemistry journal article supplement (doi:10.1039/d1fo00972a), 2021-01-01

*Electronic supplementary information for*

**Polyisoprenylated benzophenone derivatives from *Garcinia cambogia*  
and their anti-inflammatory activities**

Zheling Feng,<sup>§a</sup> Jiali Chen,<sup>§a</sup> Lu Feng,<sup>b</sup> Cheng Chen,<sup>a</sup> Yang Ye<sup>b</sup> and Ligen Lin<sup>\*a</sup>

*<sup>a</sup>State Key Laboratory of Quality Research in Chinese Medicine, Institute of Chinese Medical Sciences, University of Macau, Avenida da Universidade, Taipa, Macao 999078, People's Republic of China*

*<sup>b</sup>State Key Laboratory of Drug Research, & Natural Products Chemistry Department, Shanghai Institute of Materia Medica, Chinese Academy of Sciences, 555 Zu-Chong-Zhi Road, Zhangjiang Hi-Tech Park, Shanghai 201203, People's Republic of China*

**Figure S1.** Structures of the known compounds isolated from *Garcinia cambogia*.

**Figure S2.**  $^1\text{H}$  NMR spectrum of 4,8-*epi*-uralione F (**1**) in MeOD

**Figure S3.**  $^{13}\text{C}$  NMR spectrum of 4,8-*epi*-uralione F (**1**) in MeOD

**Figure S4.** DEPT 135 spectrum of 4,8-*epi*-uralione F (**1**) in MeOD

**Figure S5.** HSQC spectrum of 4,8-*epi*-uralione F (**1**) in MeOD

**Figure S6.** HMBC spectrum of 4,8-*epi*-uralione F (**1**) in MeOD

**Figure S7.** ROESY spectrum of 4,8-*epi*-uralione F (**1**) in MeOD

**Figure S8.** IR spectrum of 4,8-*epi*-uralione F (**1**)

**Figure S9.** UV spectrum of 4,8-*epi*-uralione F (**1**)

**Figure S10.** HRESIMS spectrum of 4,8-*epi*-uralione F (**1**)

**Figure S11.** ECD spectrum of 4,8-*epi*-uralione F (**1**)

**Figure S12.**  $^1\text{H}$  NMR spectrum of 4,8-*epi*-uralione G (**2**) in MeOD

**Figure S13.**  $^{13}\text{C}$  NMR spectrum of 4,8-*epi*-uralione G (**2**) in MeOD

**Figure S14.** DEPT 135 spectrum of 4,8-*epi*-uralione G (**2**) in MeOD

**Figure S15.** HSQC spectrum of 4,8-*epi*-uralione G (**2**) in MeOD

**Figure S16.** HMBC spectrum of 4,8-*epi*-uralione G (**2**) in MeOD

**Figure S17.** ROESY spectrum of 4,8-*epi*-uralione G (**2**) in MeOD

**Figure S18.** IR spectrum of 4,8-*epi*-uralione G (**2**)

**Figure S19.** UV spectrum of 4,8-*epi*-uralione G (**2**)

**Figure S20.** HRESIMS spectrum of 4,8-*epi*-uralione G (**2**)

**Figure S21.** ECD spectrum of 4,8-*epi*-uralione G (**2**)

**Figure S22.**  $^1\text{H}$  NMR spectrum of uralione S (**3**) in MeOD

**Figure S23.**  $^{13}\text{C}$  NMR spectrum of uralione S (**3**) in MeOD

**Figure S24.** DEPT 135 spectrum of uralione S (**3**) in MeOD

**Figure S25.** HSQC spectrum of uralione S (**3**) in MeOD

**Figure S26.** HMBC spectrum of uralione S (**3**) in MeOD

**Figure S27.** ROESY spectrum of uralione S (**3**) in MeOD

**Figure S28.** IR spectrum of uralione S (**3**)

**Figure S29.** UV spectrum of uralione S (**3**)

**Figure S30.** HRESIMS spectrum of uralione S (**3**)

**Figure S31.** ECD spectrum of uralione S (**3**)

**Figure S32.** <sup>1</sup>H NMR spectrum of coccinone J (**4**) in MeOD

**Figure S33.** <sup>13</sup>C NMR spectrum of coccinone J (**4**) in MeOD

**Figure S34.** DEPT 135 spectrum of coccinone J (**4**) in MeOD

**Figure S35.** HSQC spectrum of coccinone J (**4**) in MeOD

**Figure S36.** HMBC spectrum of coccinone J (**4**) in MeOD

**Figure S37.** ROESY spectrum of coccinone J (**4**) in MeOD

**Figure S38.** IR spectrum of coccinone J (**4**)

**Figure S39.** UV spectrum of coccinone J (**4**)

**Figure S40.** HRESIMS spectrum of coccinone J (**4**)

**Figure S41.** ECD spectrum of coccinone J (**4**)

**Figure S42.** <sup>1</sup>H NMR spectrum of 6-*epi*-coccinone C (**5**) in MeOD

**Figure S43.** <sup>13</sup>C NMR spectrum of 6-*epi*-coccinone C (**5**) in MeOD

**Figure S44.** DEPT 135 spectrum of 6-*epi*-coccinone C (**5**) in MeOD

**Figure S45.** HSQC spectrum of 6-*epi*-coccinone C (**5**) in MeOD

**Figure S46.** HMBC spectrum of 6-*epi*-coccinone C (**5**) in MeOD

**Figure S47.** ROESY spectrum of 6-*epi*-coccinone C (**5**) in MeOD

**Figure S48.** IR spectrum of 6-*epi*-coccinone C (**5**)

**Figure S49.** UV spectrum of 6-*epi*-coccinone C (**5**)

**Figure S50.** HRESIMS spectrum of 6-*epi*-coccinone C (**5**)

**Figure S51.** ECD spectrum of 6-*epi*-coccinone C (**5**)

**Figure S52.** <sup>1</sup>H NMR spectrum of coccinone I (**6**) in MeOD

**Figure S53.** <sup>13</sup>C NMR spectrum of coccinone I (**6**) in MeOD

**Figure S54.** DEPT 135 spectrum of coccinone I (**6**) in MeOD

**Figure S55.** HSQC spectrum of coccinone I (**6**) in MeOD

**Figure S56.** HMBC spectrum of coccinone I (**6**) in MeOD

**Figure S57.** ROESY spectrum of coccinone I (**6**) in MeOD

**Figure S58.** IR spectrum of coccinone I (**6**)

**Figure S59.** UV spectrum of coccinone I (**6**)

**Figure S60.** HRESIMS spectrum of coccinone I (**6**)

**Figure S61.** ECD spectrum of coccinone I (**6**)

**Figure S62.** <sup>1</sup>H NMR spectrum of 36-hydroxy-guttifeone J (**7**) in MeOD

**Figure S63.** <sup>13</sup>C NMR spectrum of 36-hydroxy-guttifeone J (**7**) in MeOD

**Figure S64.** DEPT 135 spectrum of 36-hydroxy-guttifeone J (**7**) in MeOD

**Figure S65.** HSQC spectrum of 36-hydroxy-guttifeone J (**7**) in MeOD

**Figure S66.** HMBC spectrum of 36-hydroxy-guttifeone J (**7**) in MeOD

**Figure S67.** ROESY spectrum of 36-hydroxy-guttifeone J (**7**) in MeOD

**Figure S68.** IR spectrum of 36-hydroxy-guttifeone J (**7**)

**Figure S69.** UV spectrum of 36-hydroxy-guttifeone J (**7**)

**Figure S70.** HRESIMS spectrum of 36-hydroxy-guttifeone J (**7**)

**Figure S71.** ECD spectrum of 36-hydroxy-guttifeone J (**7**)

**Figure S72.** <sup>1</sup>H NMR spectrum of multiflorone I (**8**) in MeOD



**Figure S73.**  $^{13}\text{C}$  NMR spectrum of multiflorone I (**8**) in MeOD

**Figure S74.** DEPT 135 spectrum of multiflorone I (**8**) in MeOD

**Figure S75.** HSQC spectrum of multiflorone I (**8**) in MeOD

**Figure S76.** HMBC spectrum of multiflorone I (**8**) in MeOD

**Figure S77.** ROESY spectrum of multiflorone I (**8**) in MeOD

**Figure S78.** IR spectrum of multiflorone I (**8**)

**Figure S79.** UV spectrum of multiflorone I (**8**)

**Figure S80.** HRESIMS spectrum of multiflorone I (**8**)

**Figure S81.** ECD spectrum of multiflorone I (**8**)

**Figure S82.**  $^1\text{H}$  NMR spectrum of garciniagifolone F (**9**) in MeOD

**Figure S83.**  $^{13}\text{C}$  NMR spectrum of garciniagifolone F (**9**) in MeOD

**Figure S84.** DEPT 135 spectrum of garciniagifolone F (**9**) in MeOD

**Figure S85.** HSQC spectrum of garciniagifolone F (**9**) in MeOD

**Figure S86.** HMBC spectrum of garciniagifolone F (**9**) in MeOD

**Figure S87.** ROESY spectrum of garciniagifolone F (**9**) in MeOD

**Figure S88.** IR spectrum of garciniagifolone F (**9**)

**Figure S89.** UV spectrum of garciniagifolone F (**9**)

**Figure S90.** HRESIMS spectrum of garciniagifolone F (**9**)

**Figure S91.** ECD spectrum of garciniagifolone F (**9**)

**Figure S92.**  $^1\text{H}$  NMR spectrum of 36-hydroxy-garciniagifolone F (**10**) in MeOD

**Figure S93.**  $^{13}\text{C}$  NMR spectrum of 36-hydroxy-garciniagifolone F (**10**) in MeOD

**Figure S94.** DEPT 135 spectrum of 36-hydroxy-garciniagifolone F (**10**) in MeOD

**Figure S95.** HSQC spectrum of 36-hydroxy-garciniagifolone F (**10**) in MeOD

**Figure S96.** HMBC spectrum of 36-hydroxy-garciniagifolone F (**10**) in MeOD

**Figure S97.** ROESY spectrum of 36-hydroxy-garciniagifolone F (**10**) in MeOD

**Figure S98.** IR spectrum of 36-hydroxy-garciniagifolone F (**10**)

**Figure S99.** UV spectrum of 36-hydroxy-garciniagifolone F (**10**)

**Figure S100.** HRESIMS spectrum of 36-hydroxy-garciniagifolone F (**10**)

**Figure S101.** ECD spectrum of 36-hydroxy-garciniagifolone F (**10**)

**Figure S102.** Preparative-HPLC program image of BA2

**Figure S103.** Preparative -HPLC program image of BF2

**Figure S104.** Preparative -HPLC program image of BF3

**Figure S105.** Preparative -HPLC program image of BF4B

**Figure S106.** Preparative -HPLC program image of BF4D

**Figure S107.** Preparative -HPLC program image of GD

**Figure S1.** Structures of the known compounds isolated from *Garcinia cambogia*.

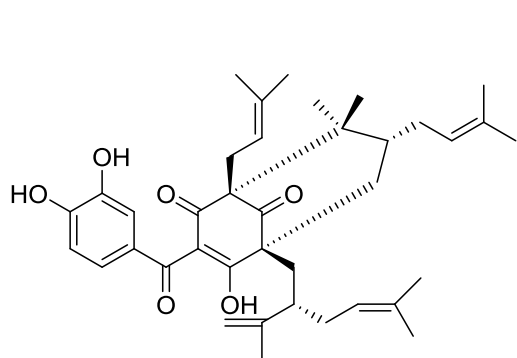

**11**

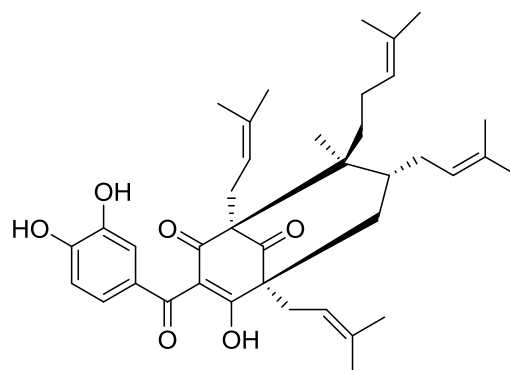

**12**

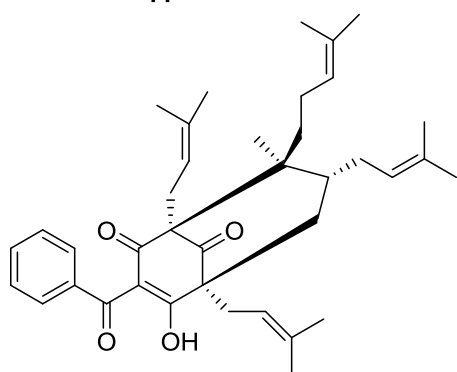

**13**

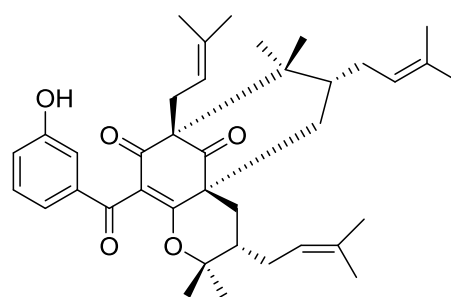

**14**

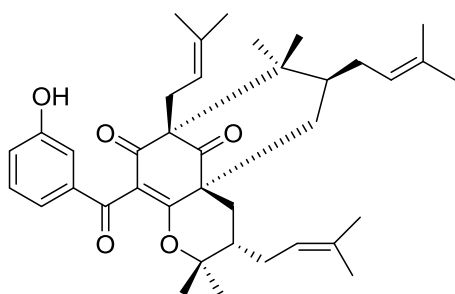

**15**

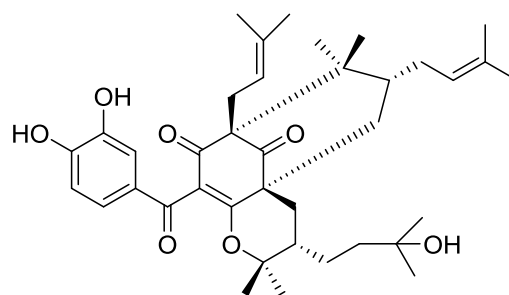

**16**

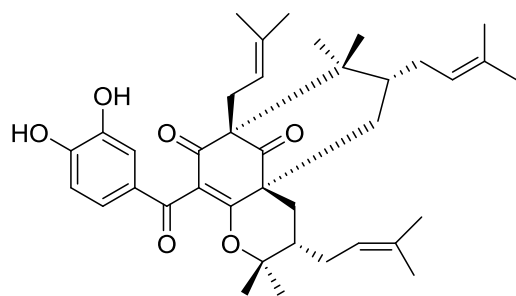

**17**

**Figure S2.**  $^1\text{H}$  NMR spectrum of 4,8-*epi*-uralione **1** in MeOD

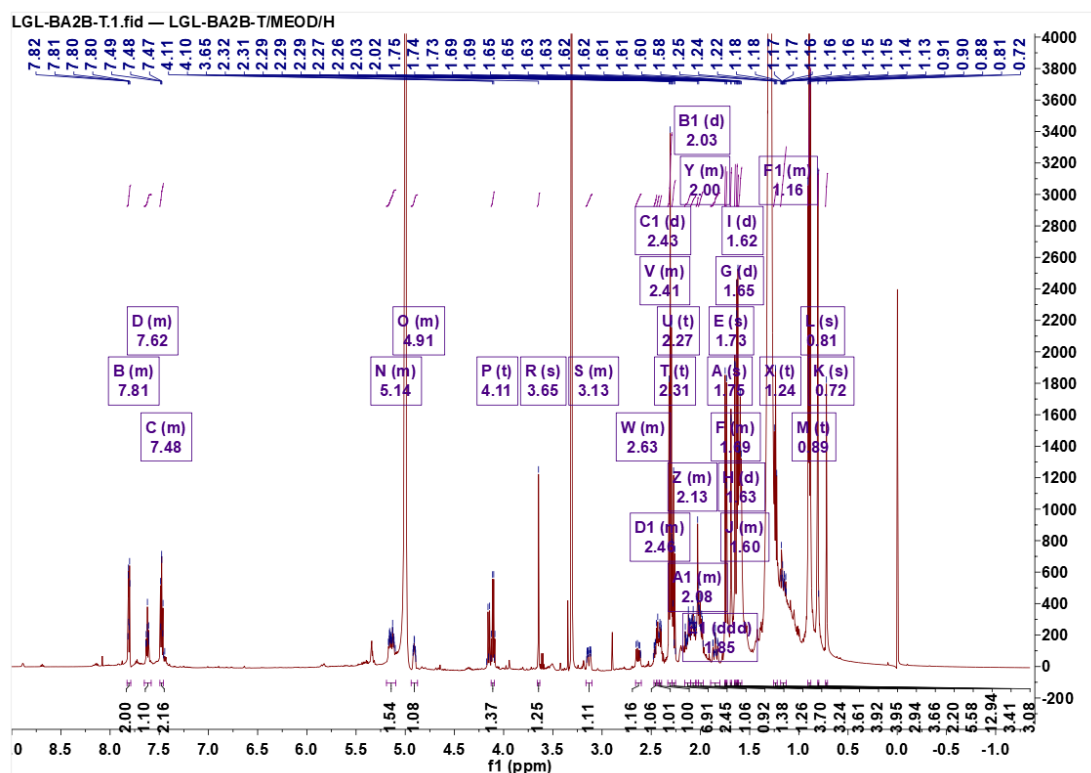

**Figure S3.**  $^{13}\text{C}$  NMR spectrum of 4,8-*epi*-uralione **1** in MeOD

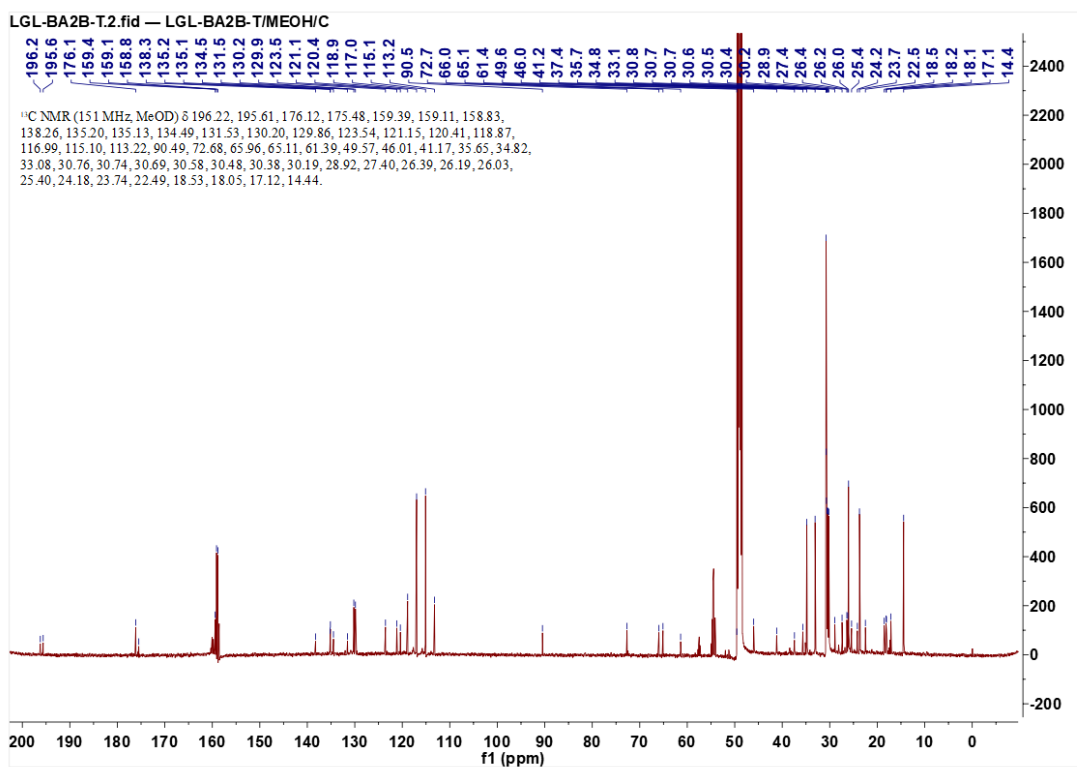

**Figure S4.** DEPT 135 spectrum of 4,8-*epi*-uralione F (**1**) in MeOD

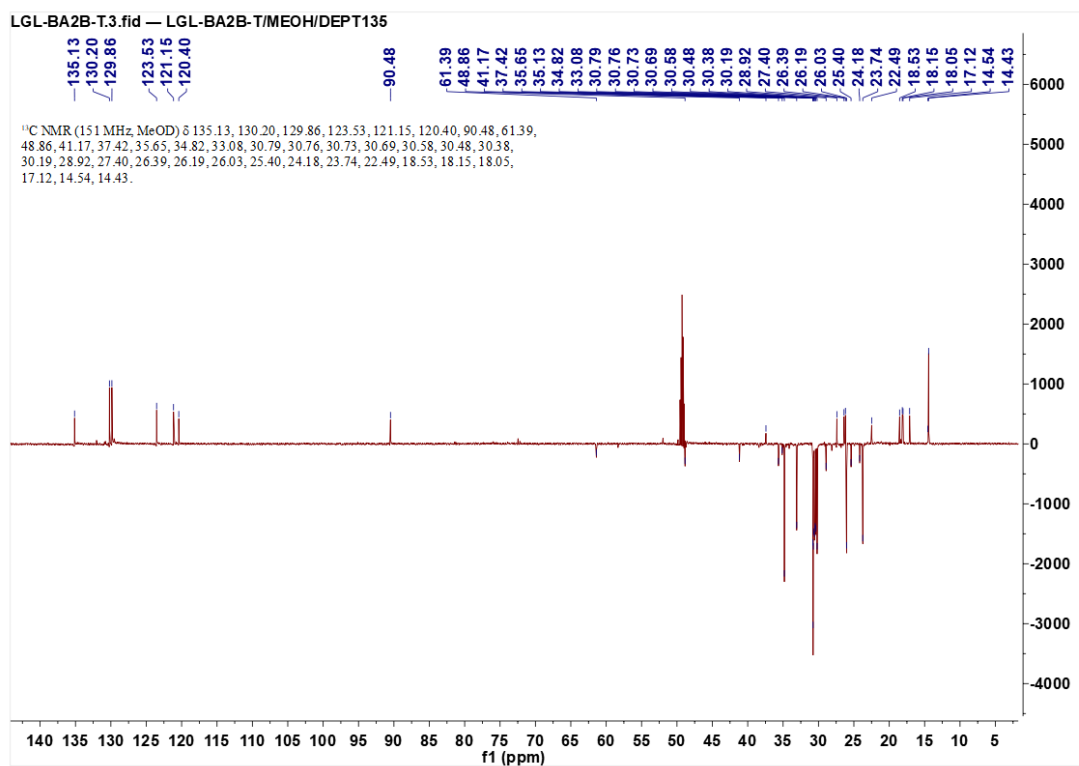

**Figure S5.** HSQC spectrum of 4,8-*epi*-uralione F (**1**) in MeOD

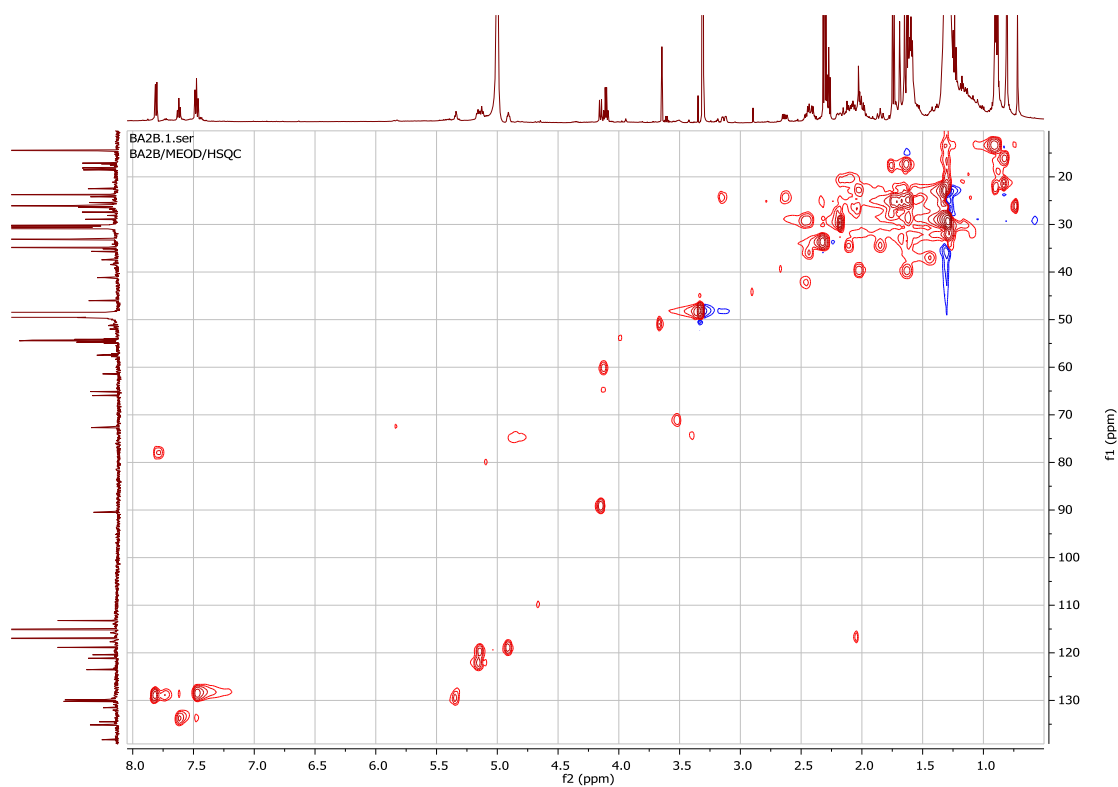

**Figure S6.** HMBC spectrum of 4,8-*epi*-urallone F (**1**) in MeOD

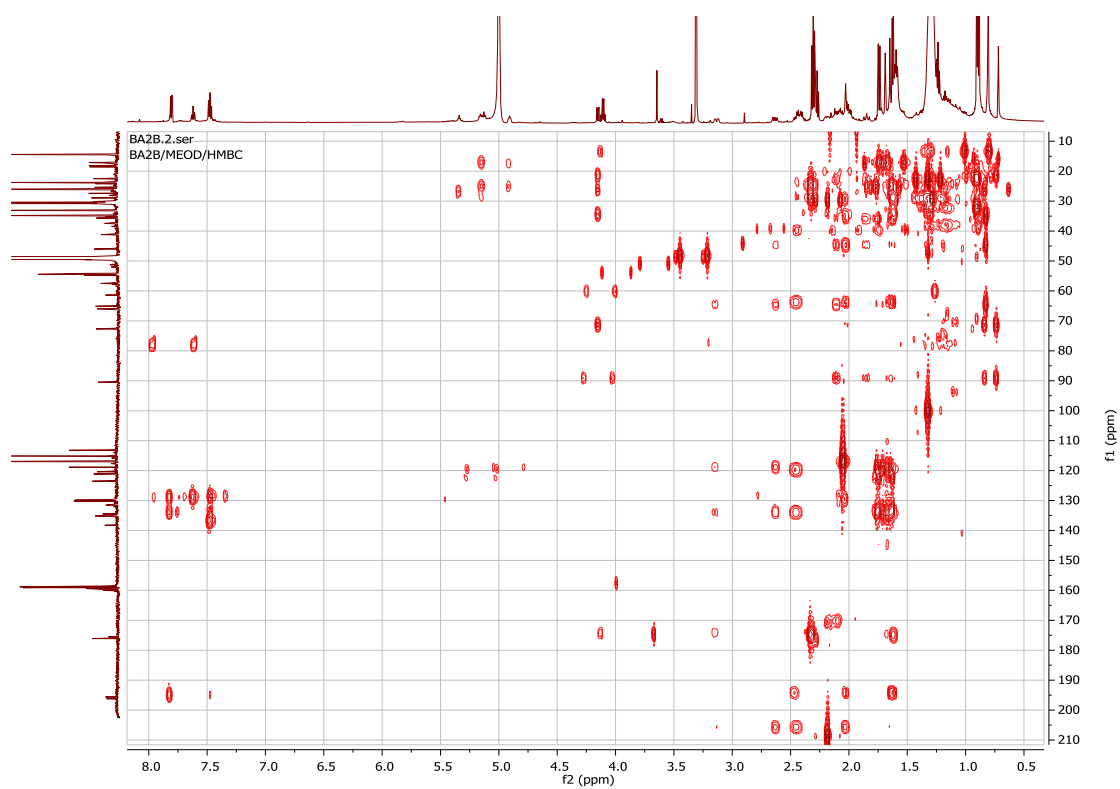

**Figure S7.** ROESY spectrum of 4,8-*epi*-urallone F (**1**) in MeOD

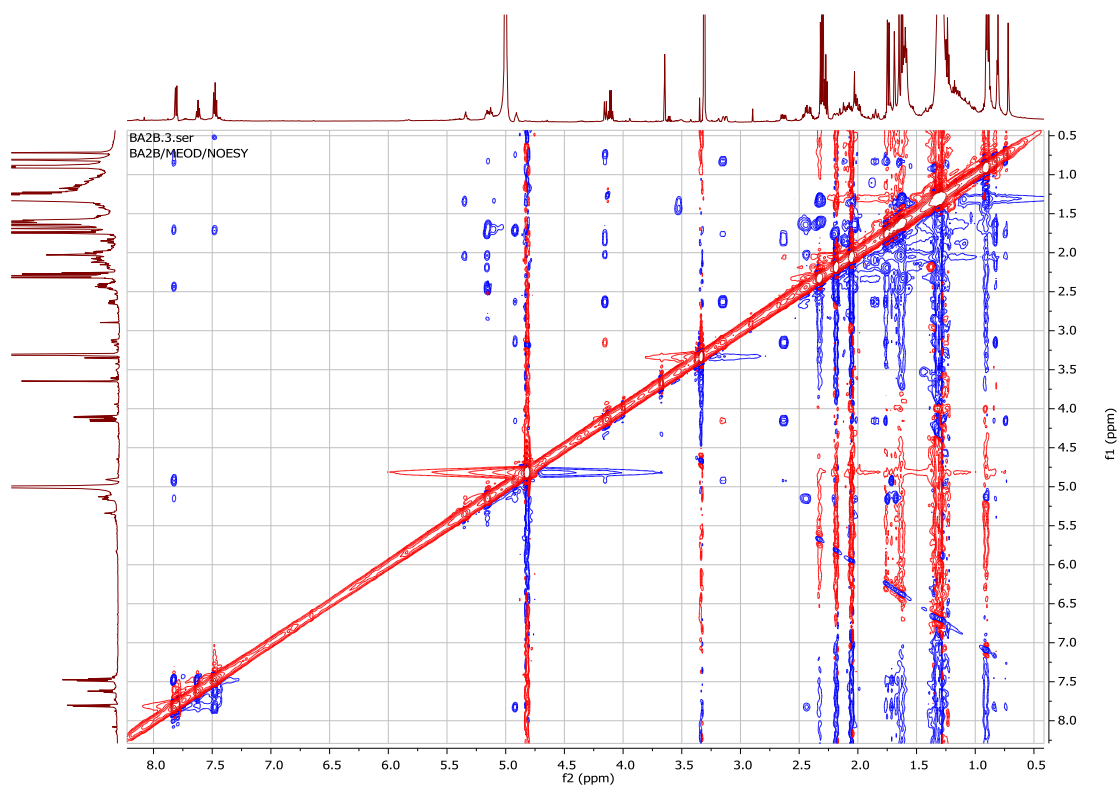

**Figure S8.** IR spectrum of 4,8-*epi*-uralione F (1)

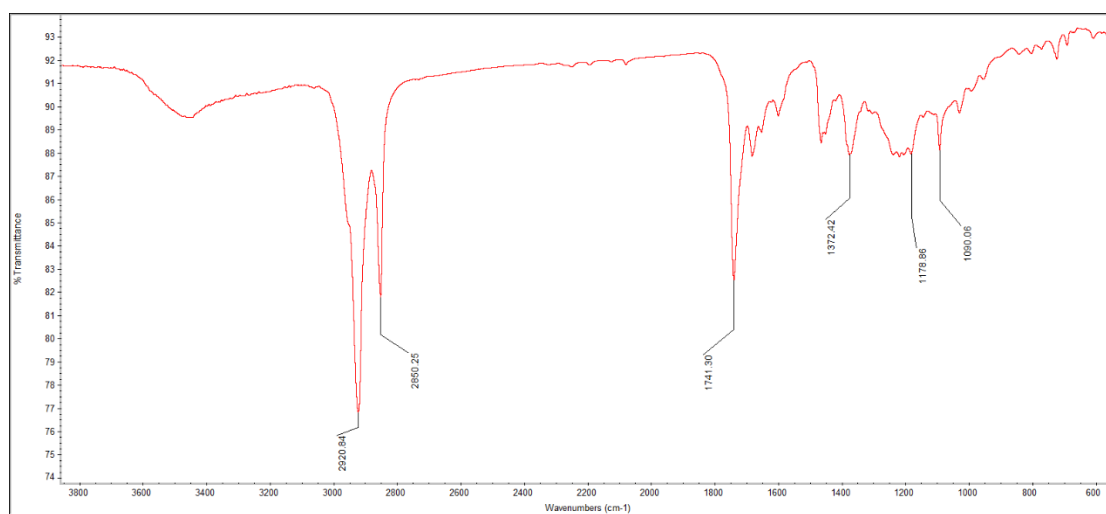

**Figure S9.** UV spectrum of 4,8-*epi*-uralione F (1)

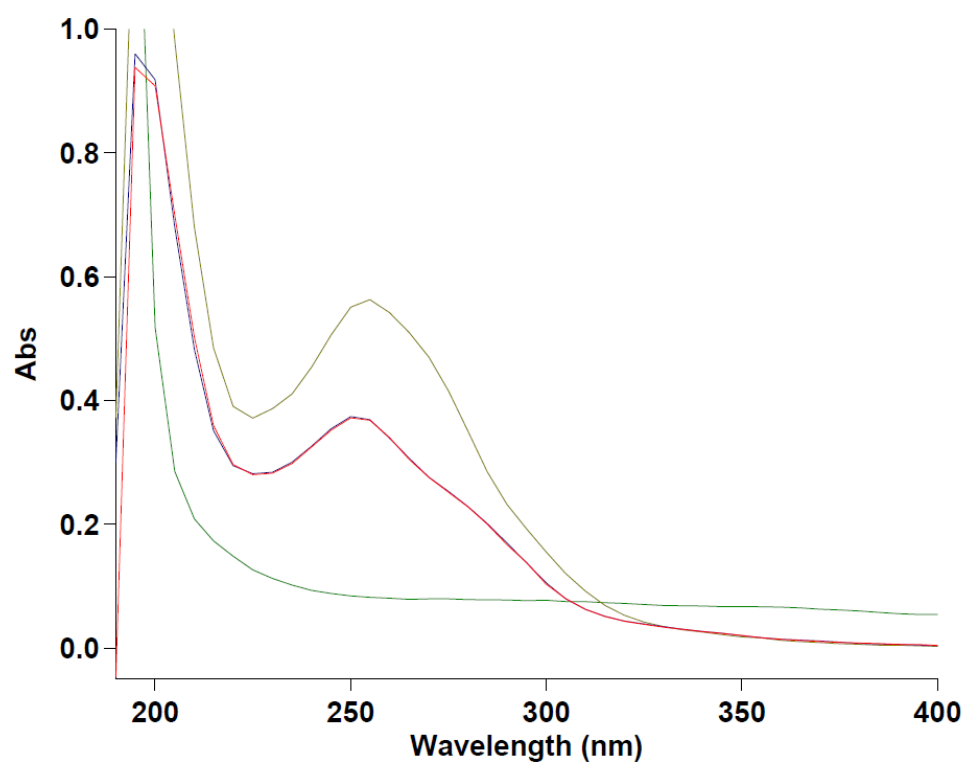

**Figure S10.** HRESIMS spectrum of 4,8-*epi*-uralione F (1)

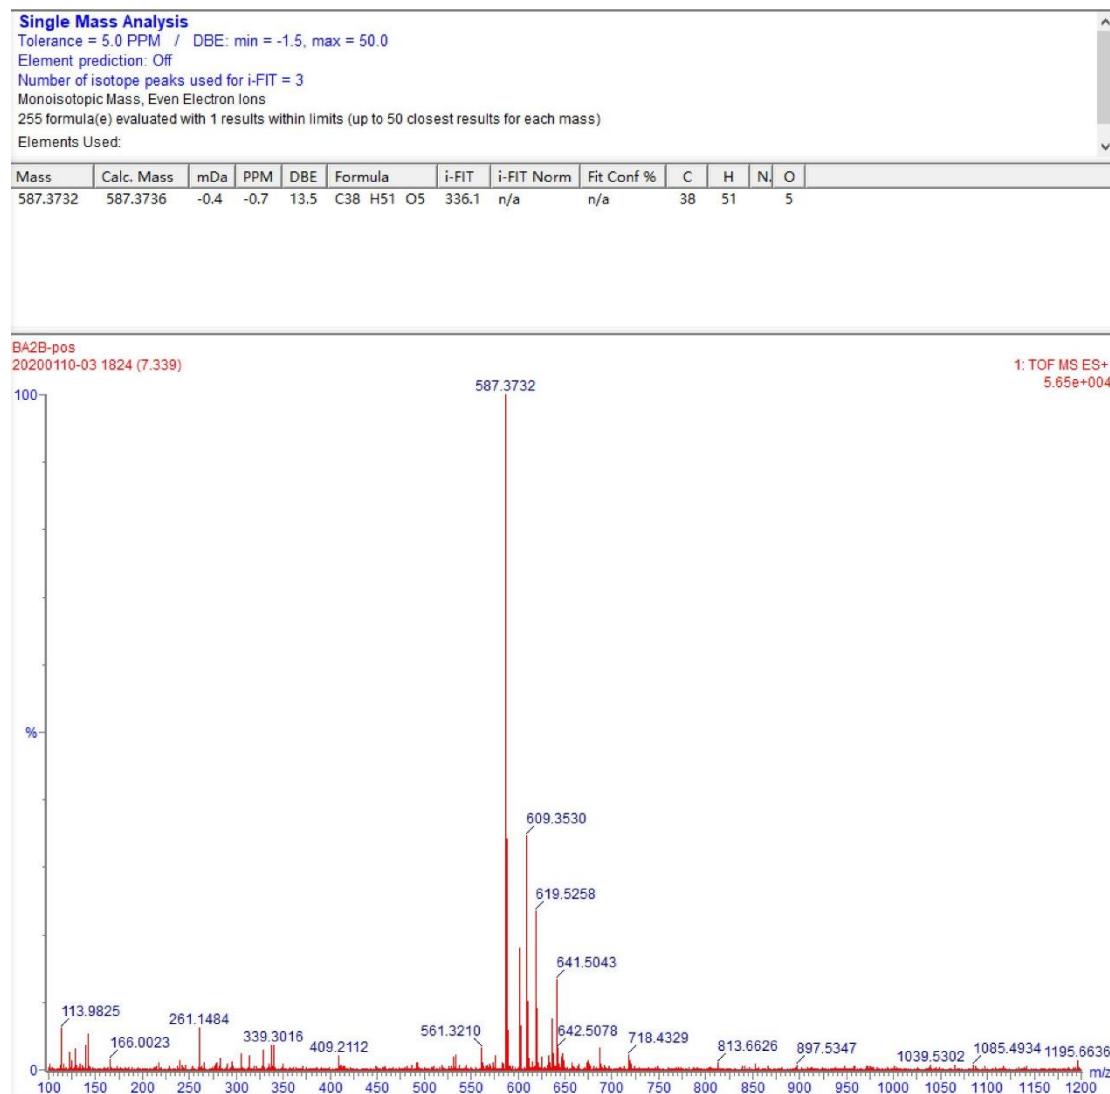



Figure S11. ECD spectrum of 4,8-*epi*-uralione **1**

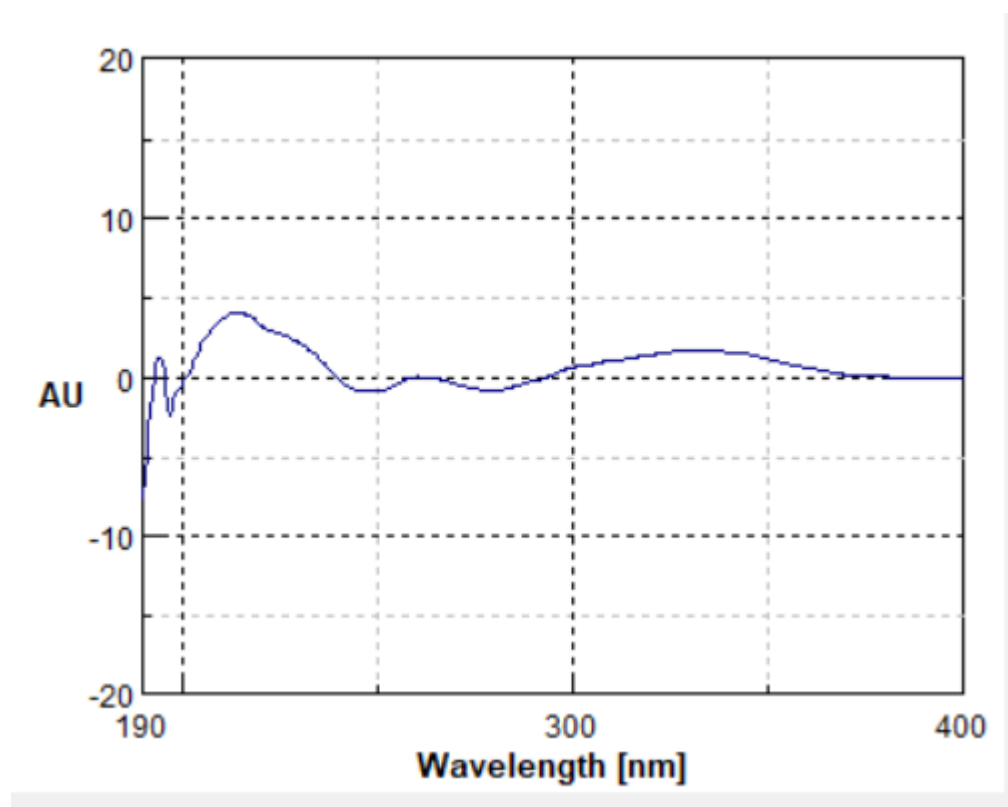

Figure S12.  $^1\text{H}$  NMR spectrum of 4,8-*epi*-uralione **2** in MeOD

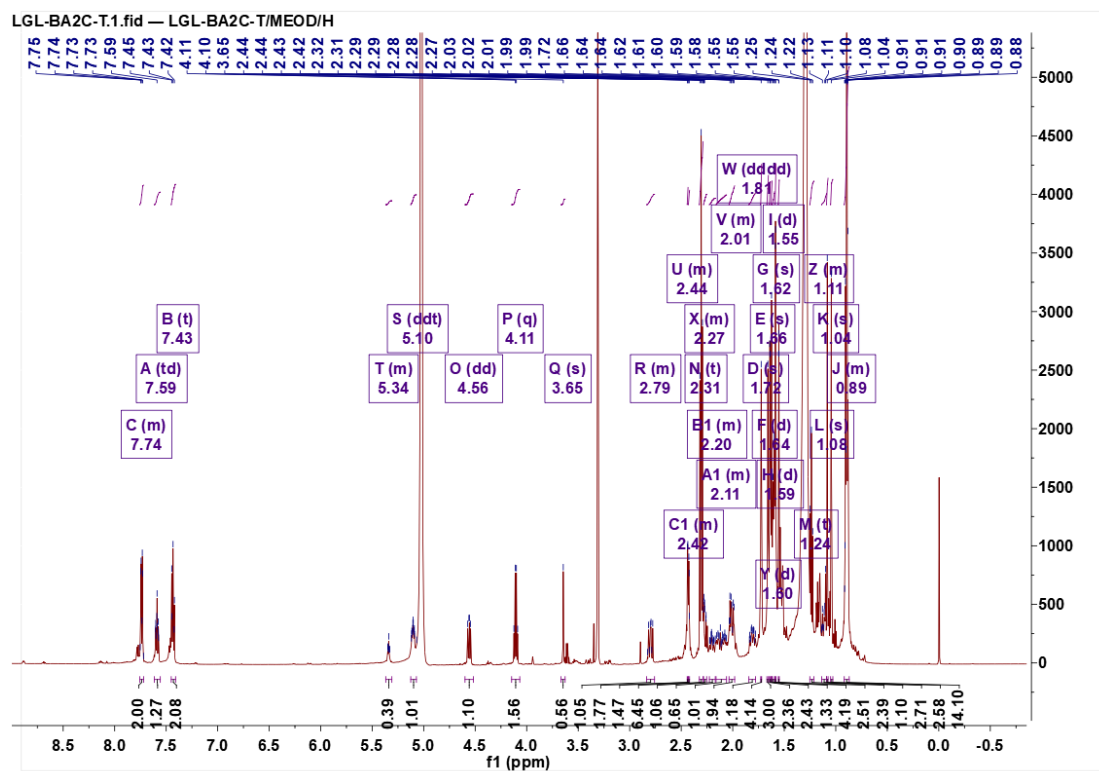

**Figure S13.**  $^{13}\text{C}$  NMR spectrum of 4,8-*epi*-uralione G (**2**) in MeOD

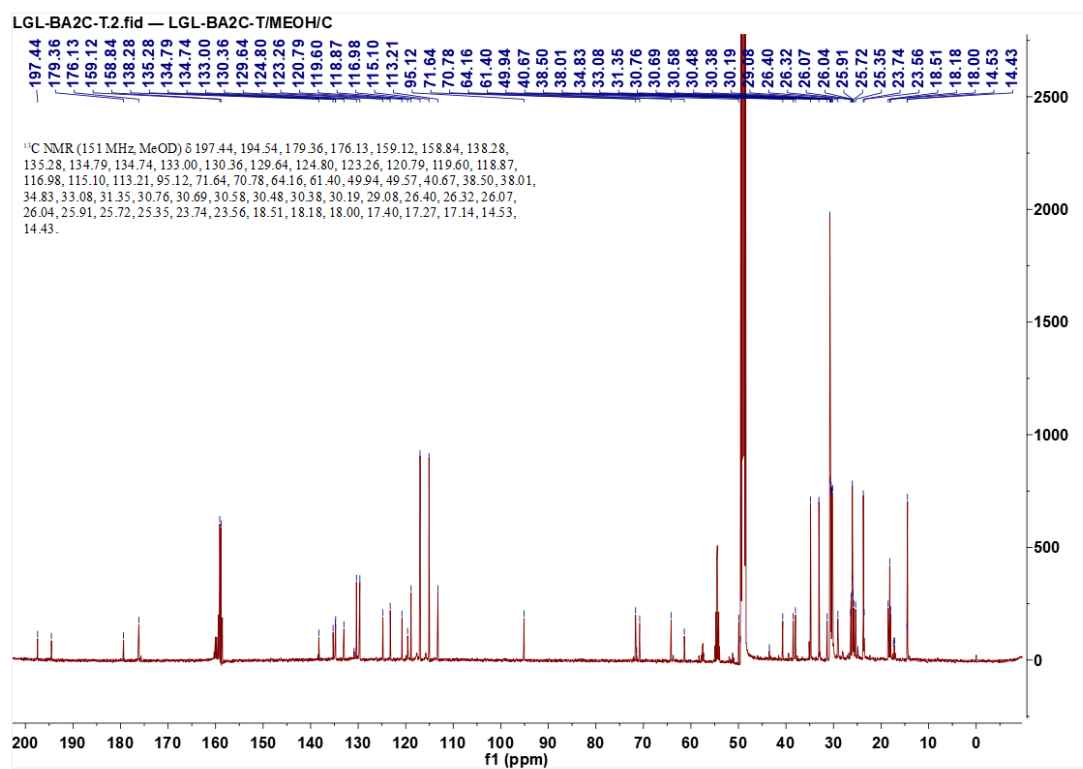

**Figure S14.** DEPT 135 spectrum of 4,8-*epi*-uralione G (**2**) in MeOD

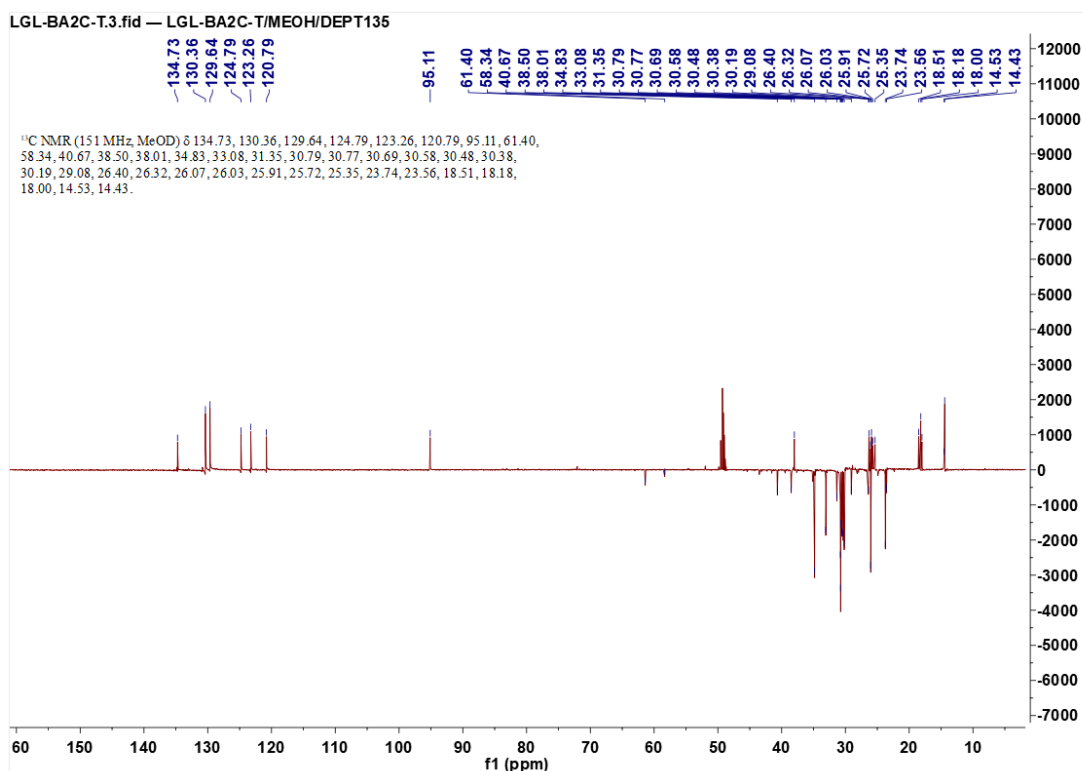

**Figure S15.** HSQC spectrum of 4,8-*epi*-uralione G (**2**) in MeOD

LGL-BA2C.5.ser — LGL-BA2C/MEOD/HSQC

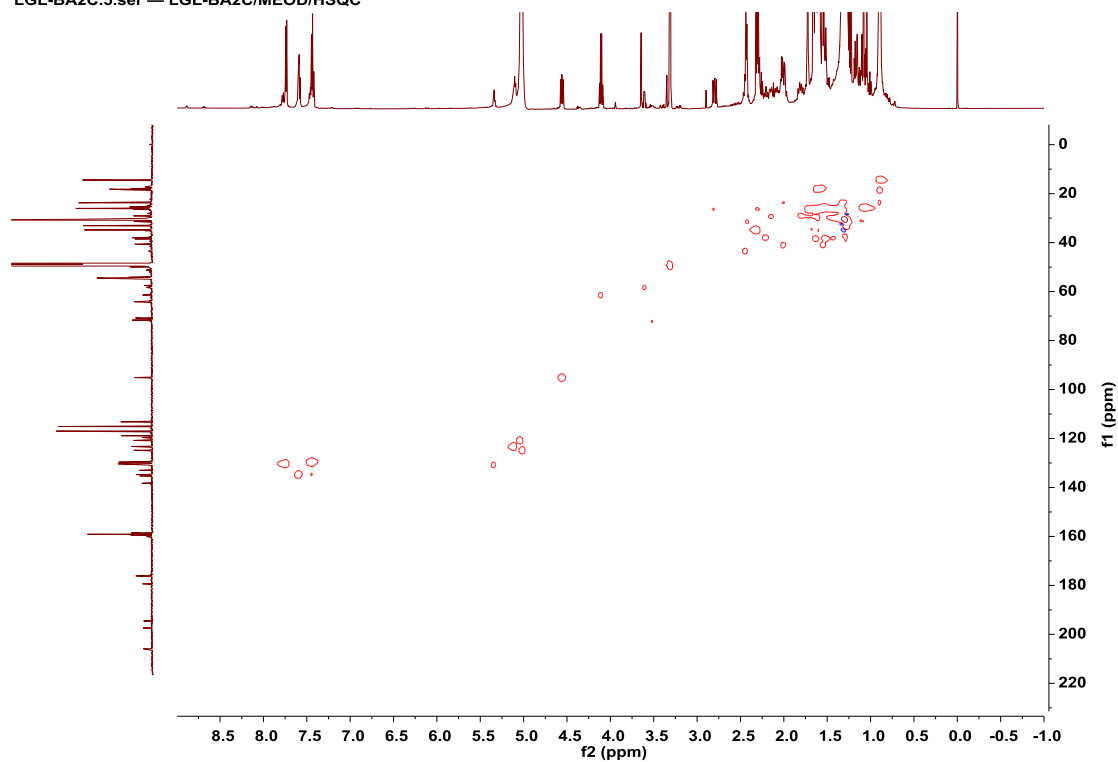

**Figure S16.** HMBC spectrum of 4,8-*epi*-uralione G (**2**) in MeOD

LGL-BA2C.6.ser — LGL-BA2C/MEOD/HMBC

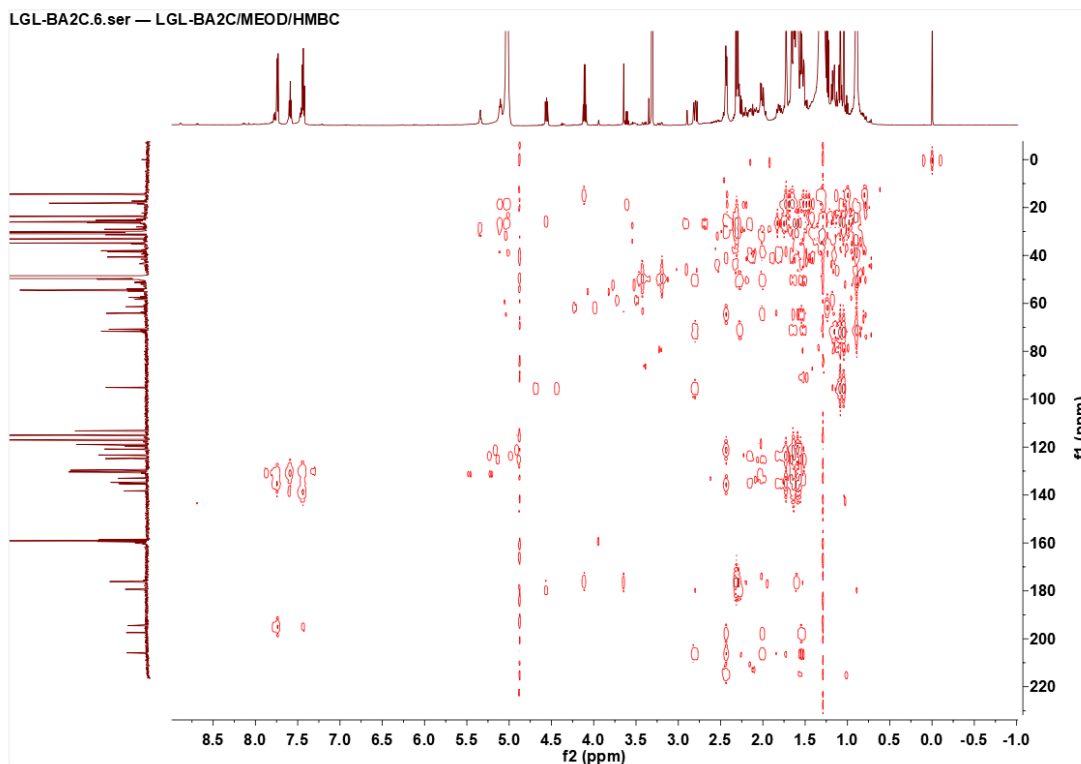

**Figure S17.** ROESY spectrum of 4,8-*epi*-uralione G (**2**) in MeOD

LGL-BA2C.8.1.2rr — LGL-BA2C/MEOD/ROESY

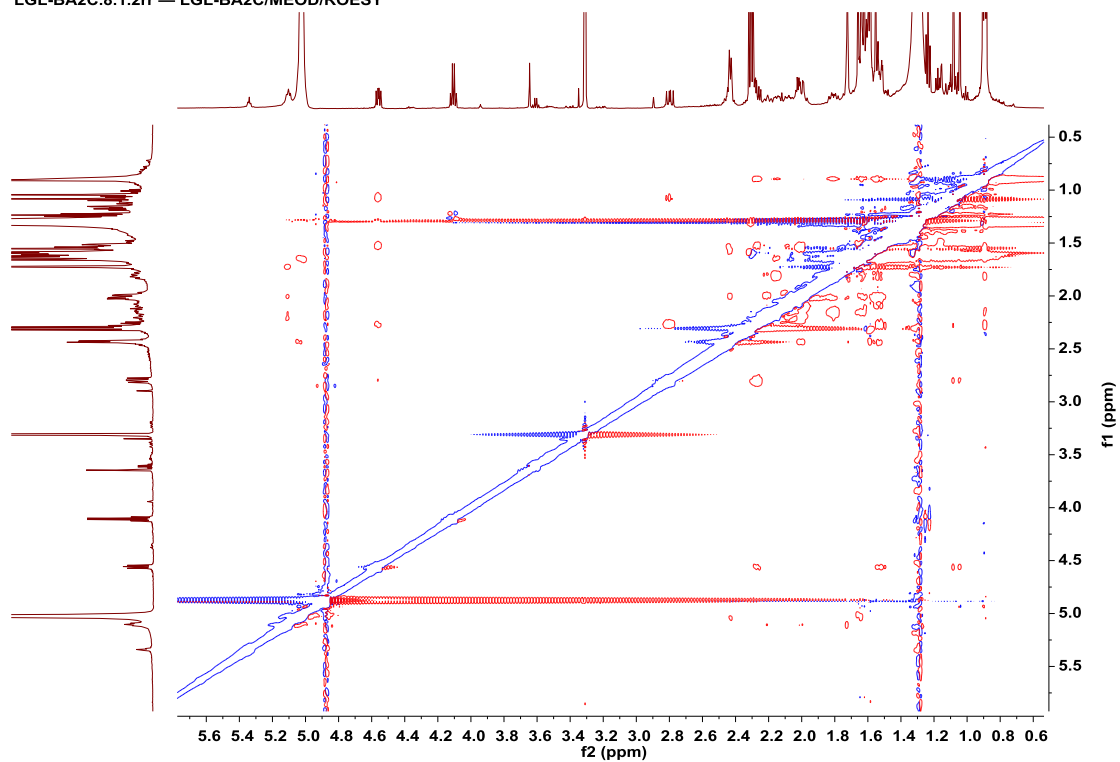

**Figure S18.** IR spectrum of 4,8-*epi*-uralione G (**2**)

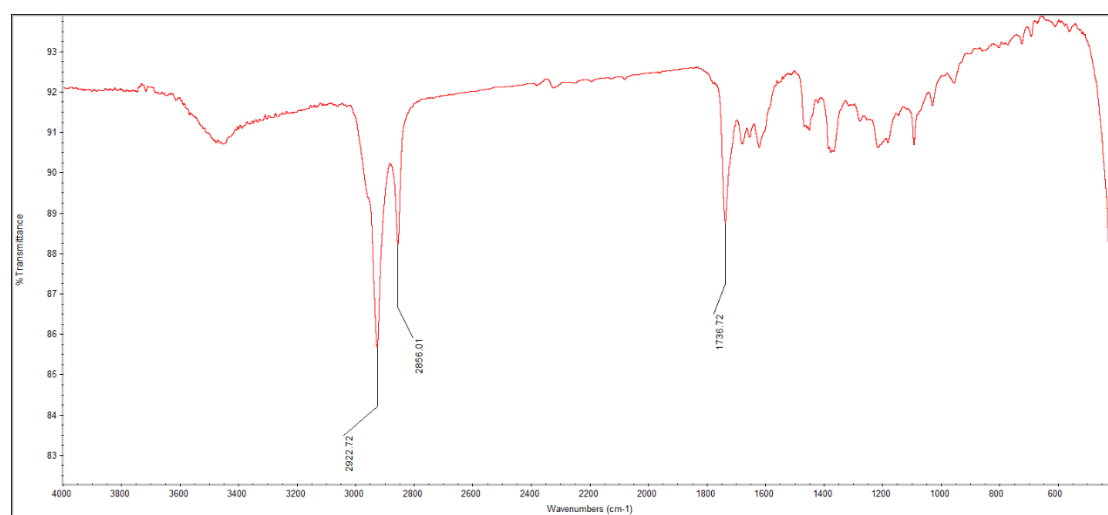

Figure S19. UV spectrum of 4,8-*epi*-uralione G (2)

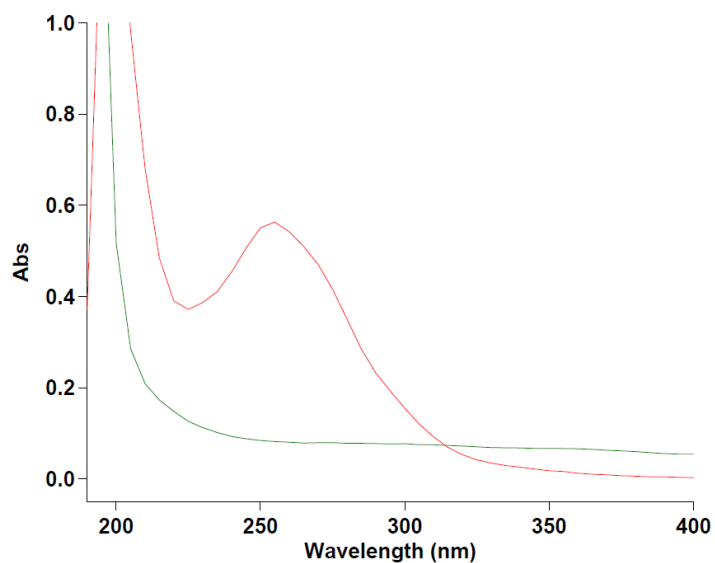

Figure S20. HRESIMS spectrum of 4,8-*epi*-uralione G (2)

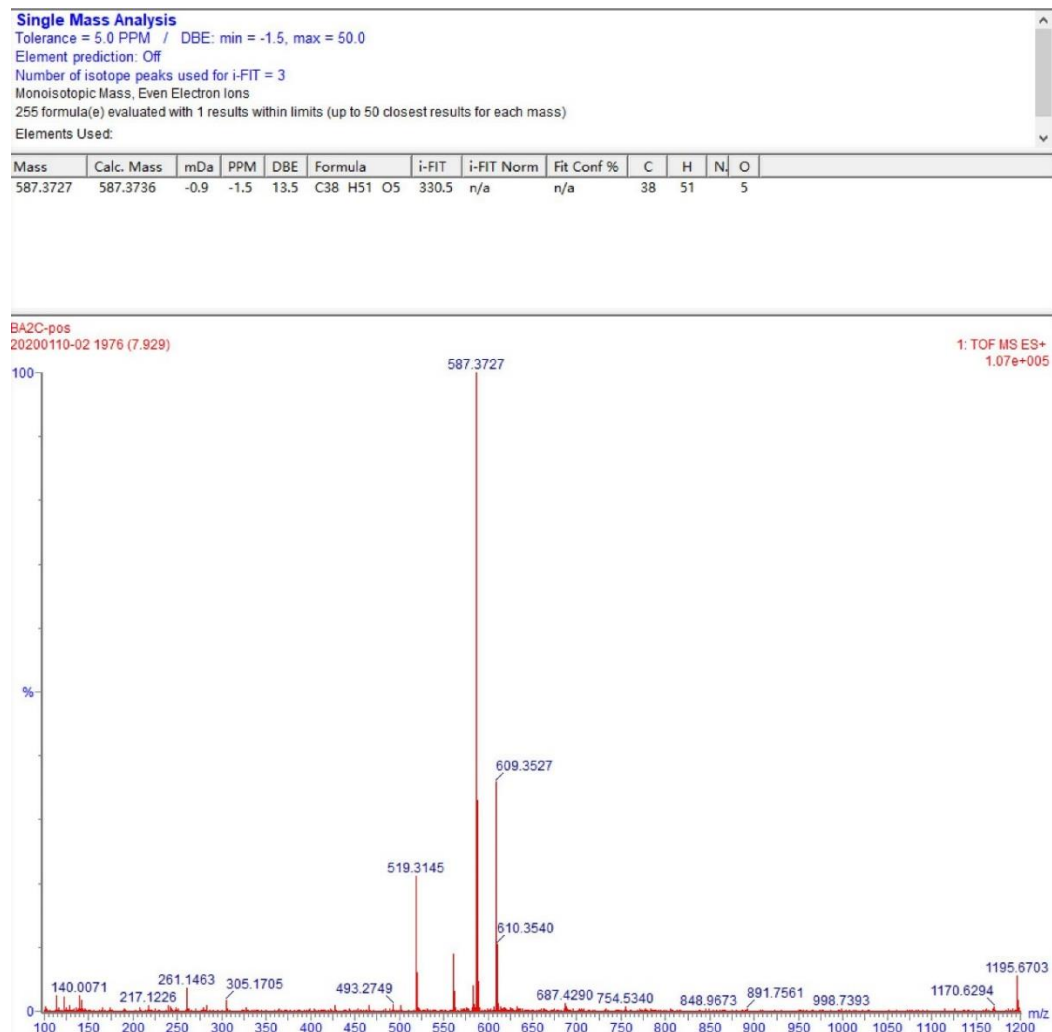

Figure S21. ECD spectrum of 4,8-*epi*-uralione G (2)

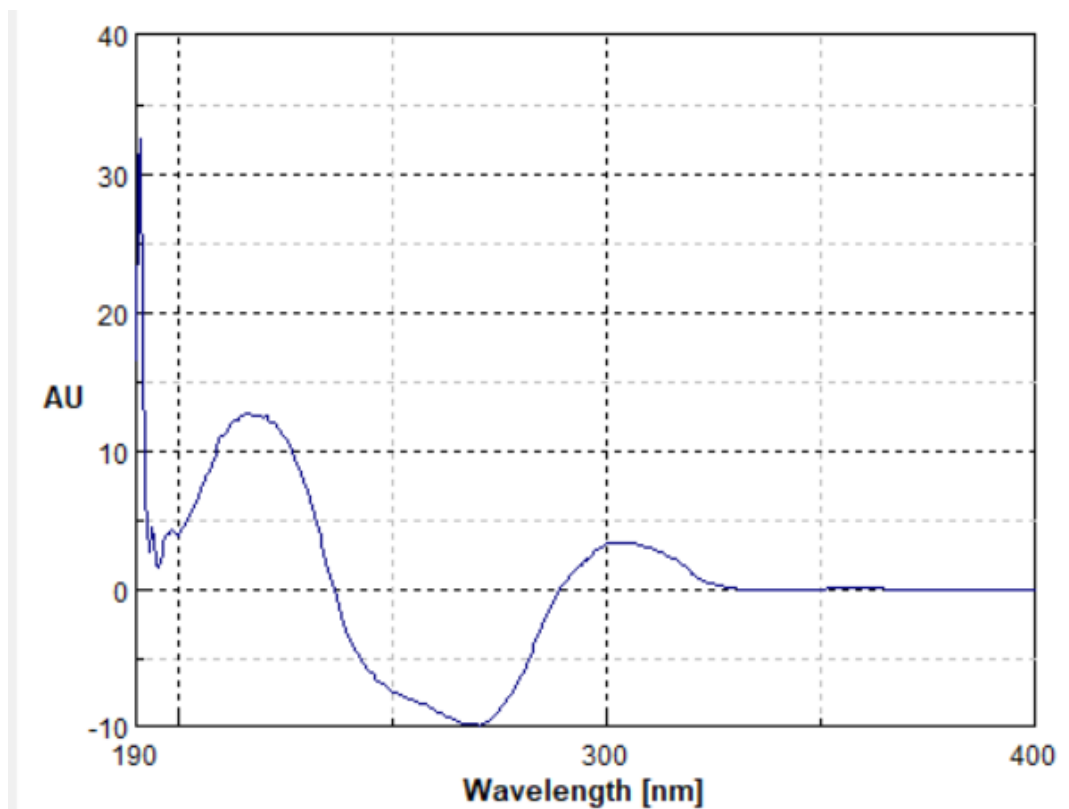

Figure S22.  $^1\text{H}$  NMR spectrum of uralione S (3) in MeOD

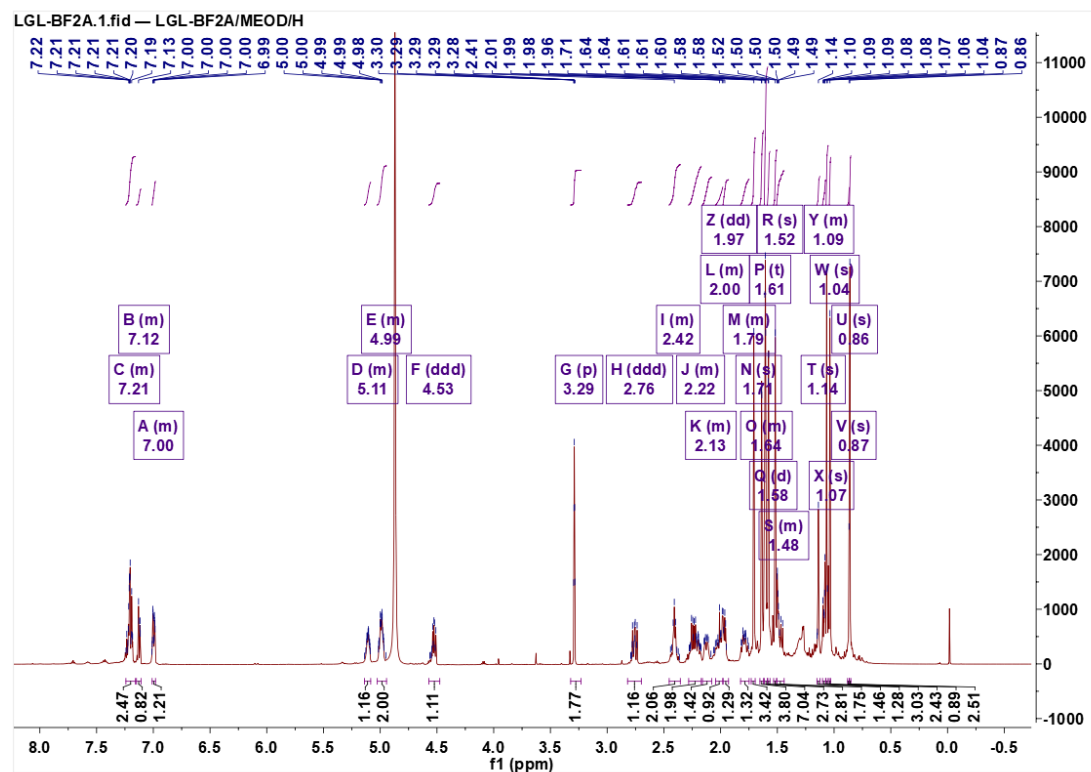

**Figure S23.**  $^{13}\text{C}$  NMR spectrum of uralione S (**3**) in MeOD

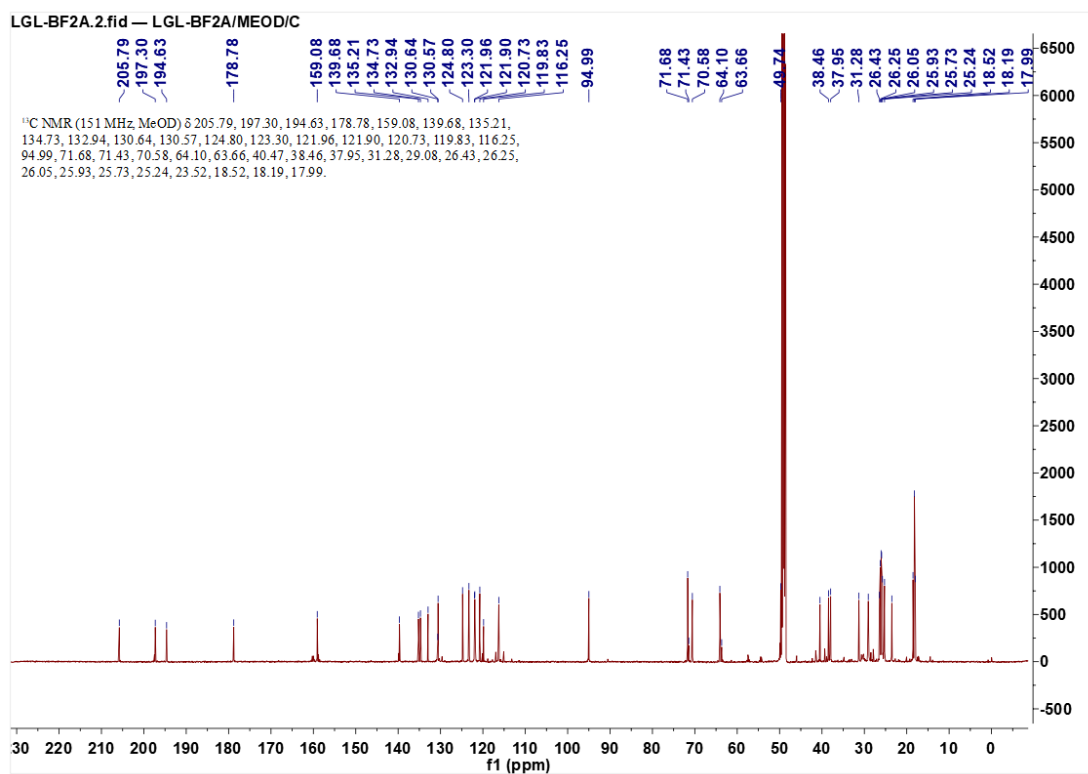

**Figure S24.** DEPT 135 spectrum of uralione S (**3**) in MeOD

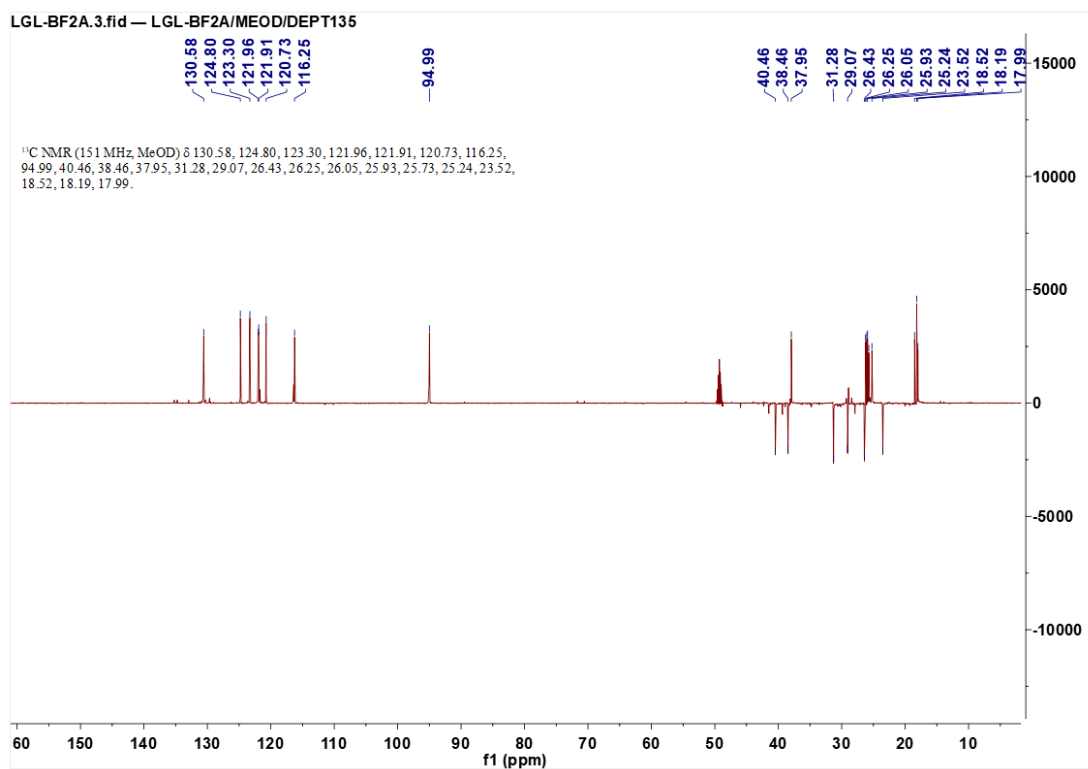

**Figure S25.** HSQC spectrum of uralione S (**3**) in MeOD

BF2A.1.ser — BF2A/MEOD/HSQC

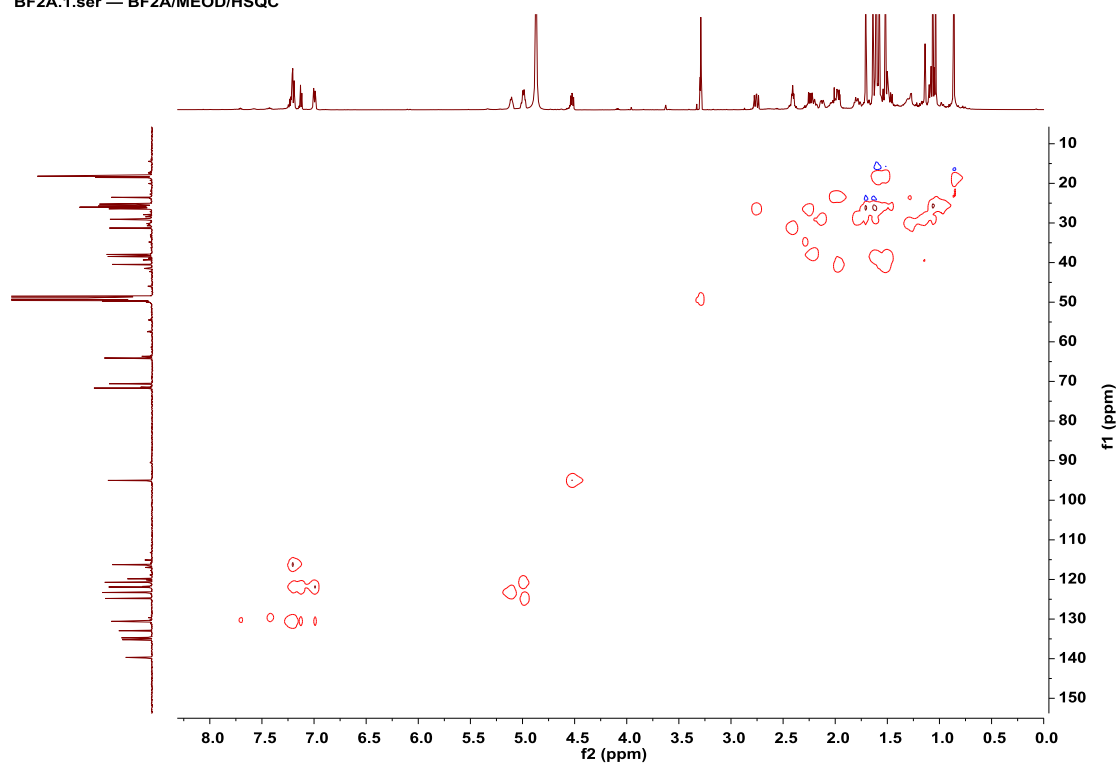

**Figure S26.** HMBC spectrum of uralione S (**3**) in MeOD

BF2A.2.ser — BF2A/MEOD/HMBC

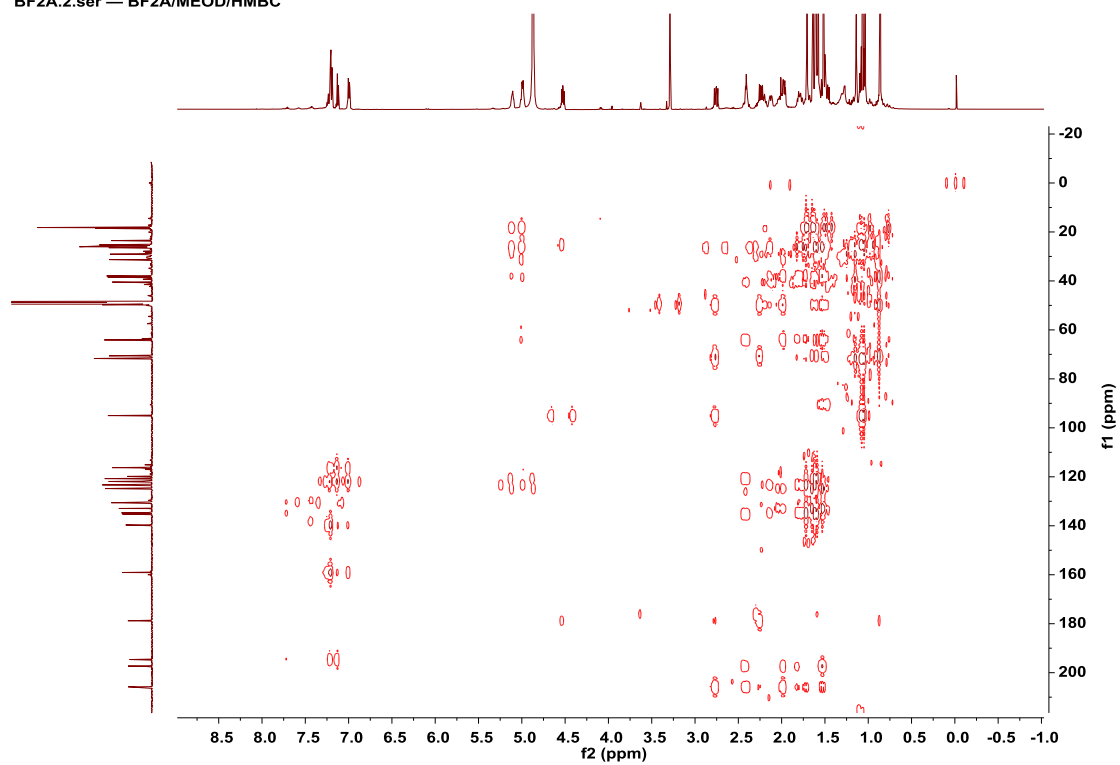



**Figure S27. ROESY spectrum of uralione S (3) in MeOD**

BF2A.3.ser — BF2A/MEOD/NOESY

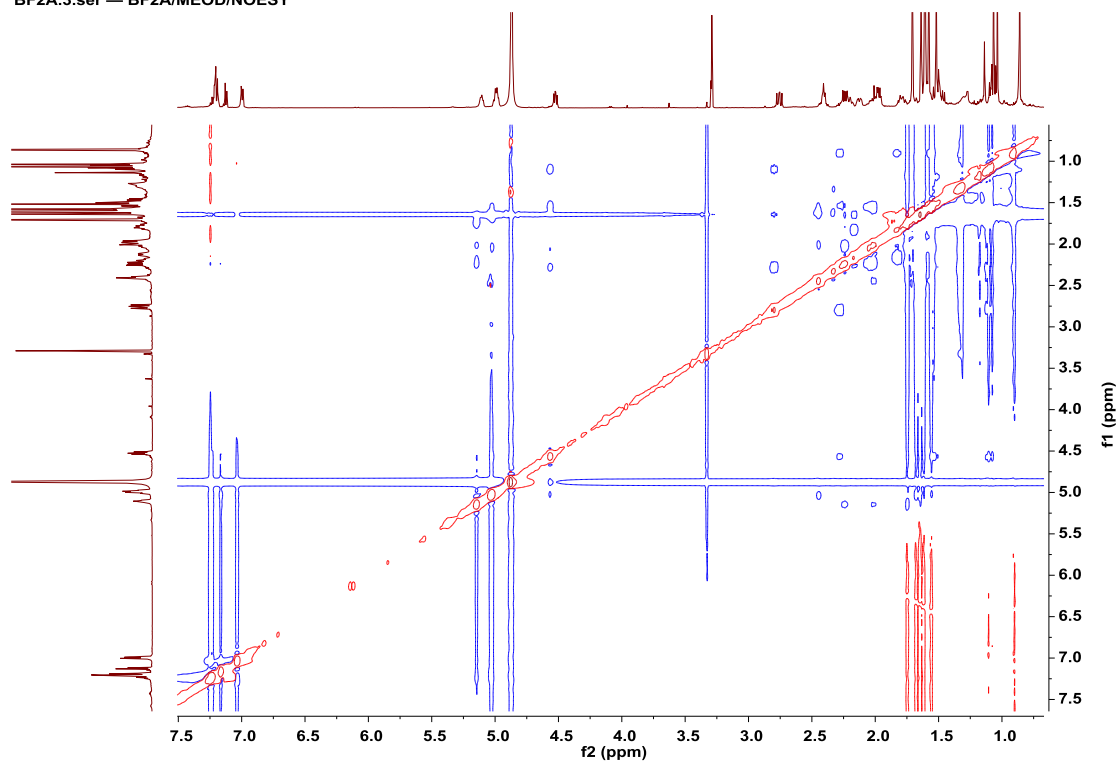

**Figure S28. IR spectrum of uralione S (3)**

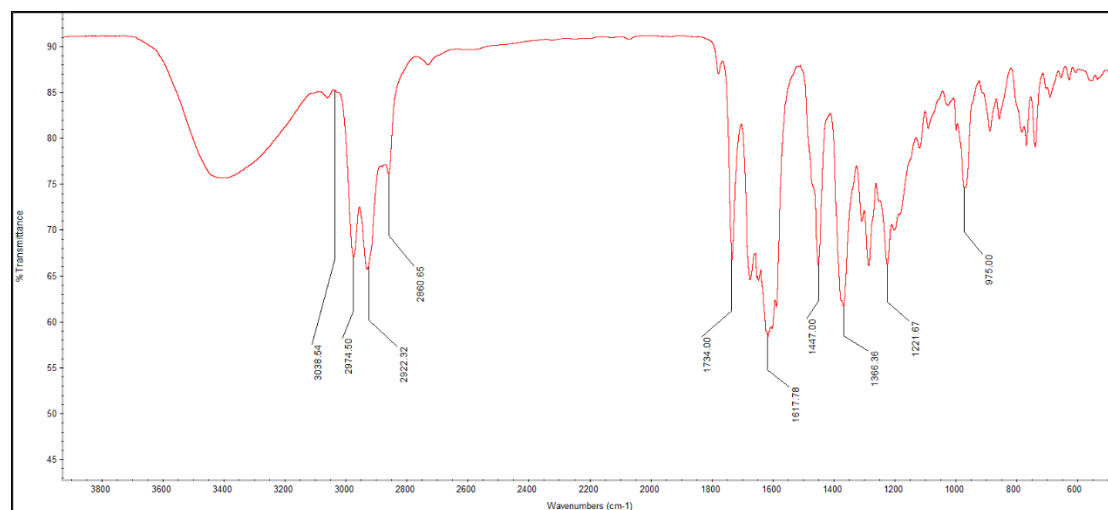

Figure S29. UV spectrum of uralione S (3)

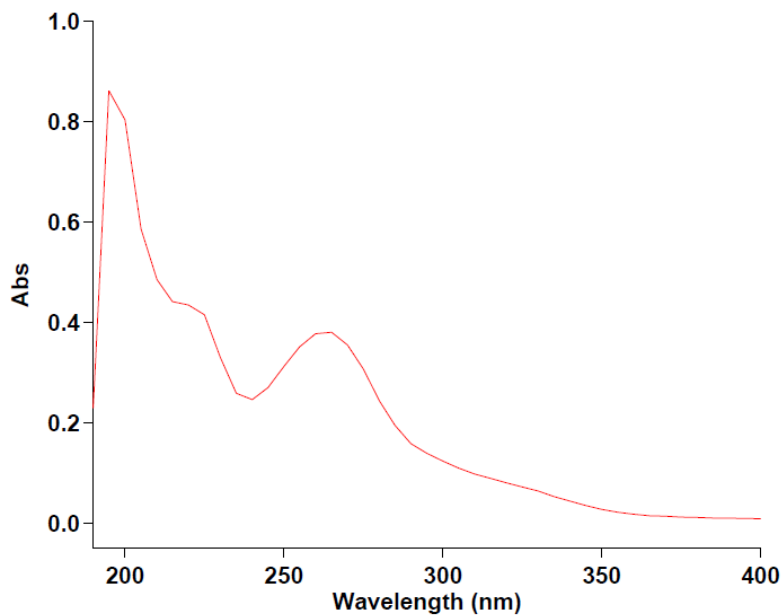

Figure S30. HRESIMS spectrum of uralione S (3)

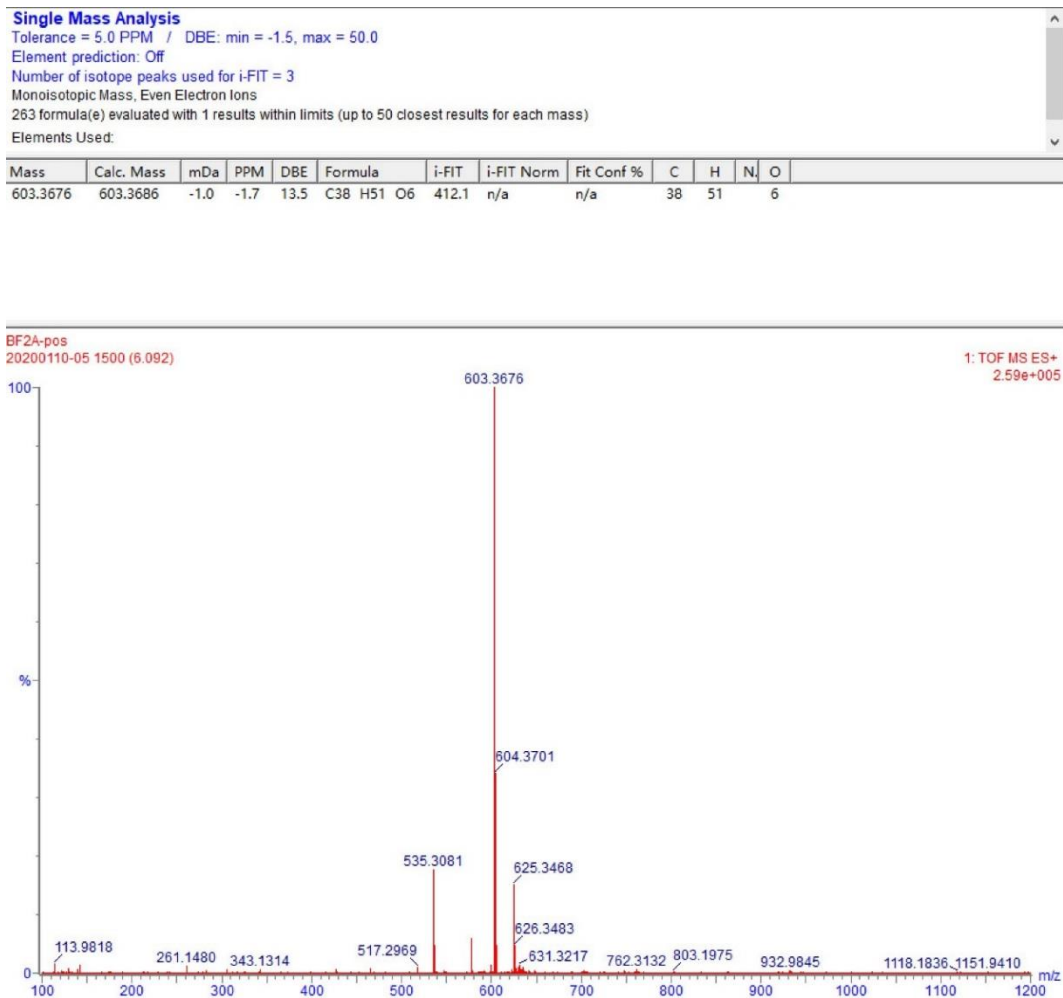

Figure S31. ECD spectrum of uralione S (3)

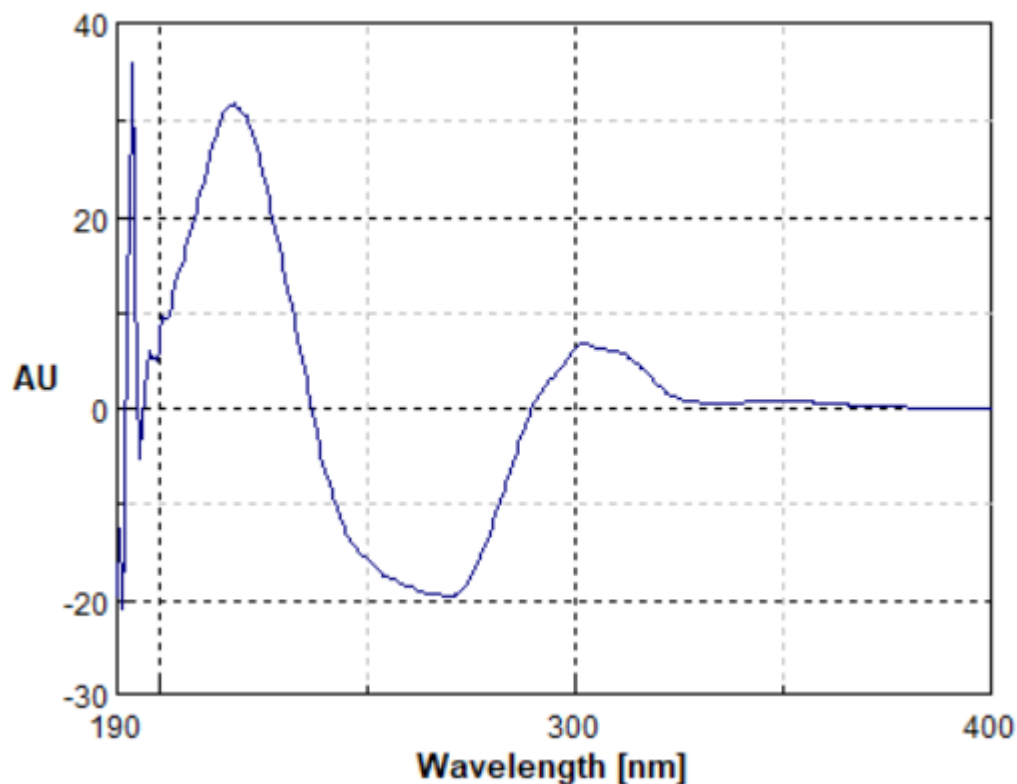

Figure S32.  $^1\text{H}$  NMR spectrum of coccinone J (4) in MeOD

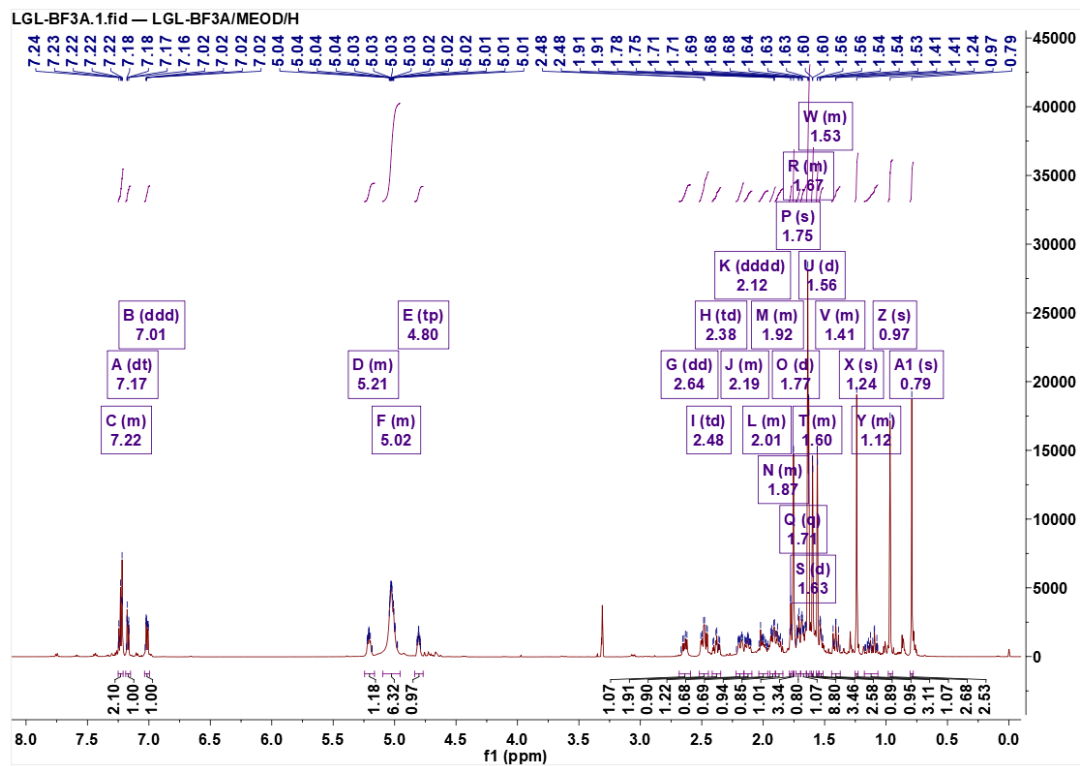

**Figure S33.**  $^{13}\text{C}$  NMR spectrum of coccinone J (**4**) in MeOD

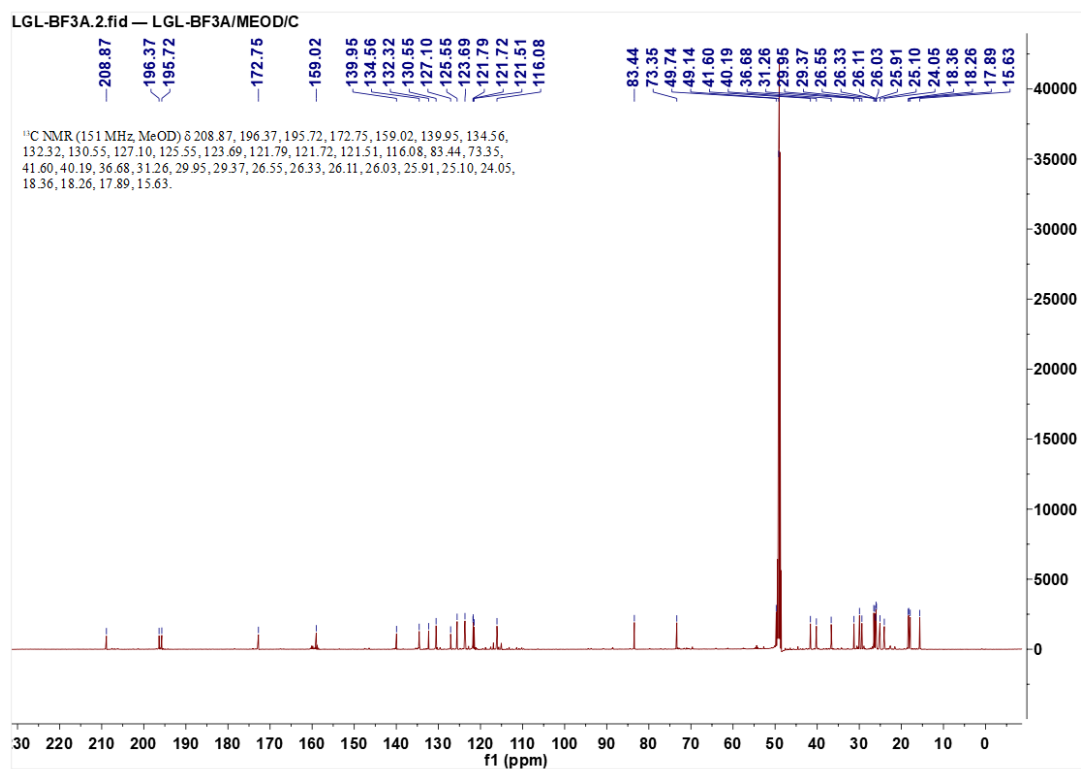

**Figure S34.** DEPT 135 spectrum of coccinone J (**4**) in MeOD

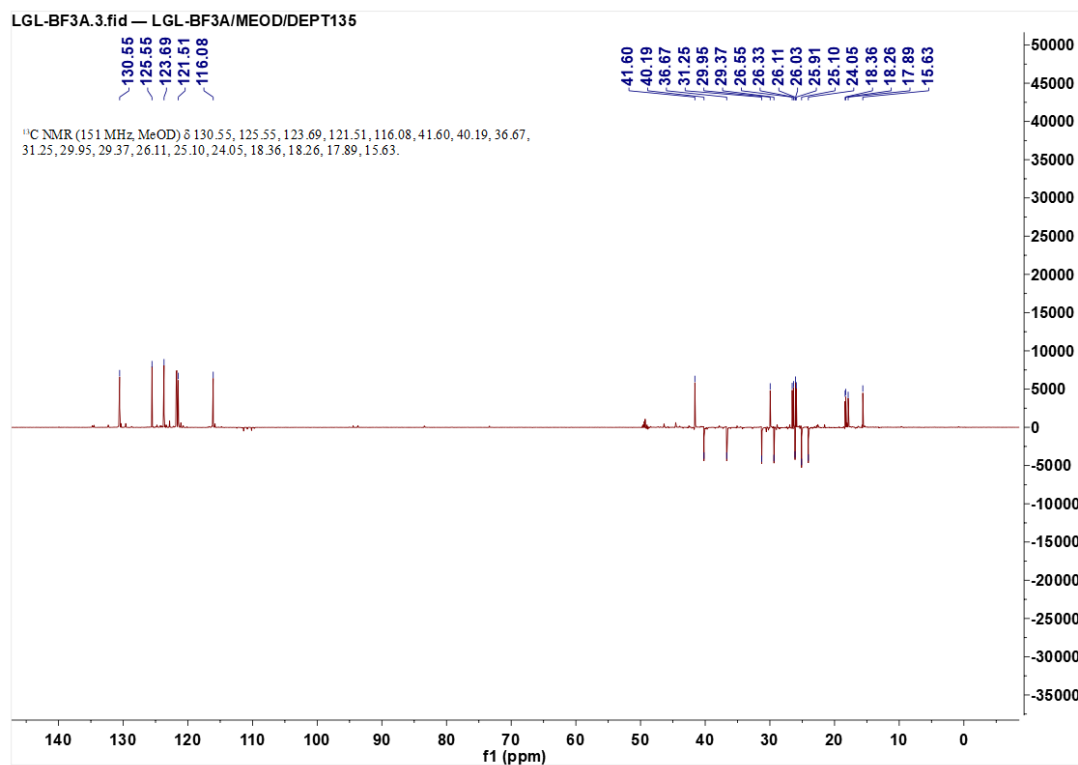

**Figure S35.** HSQC spectrum of coccinone J (**4**) in MeOD

BF3A.1.ser — BF3A/MEOD/HSQC

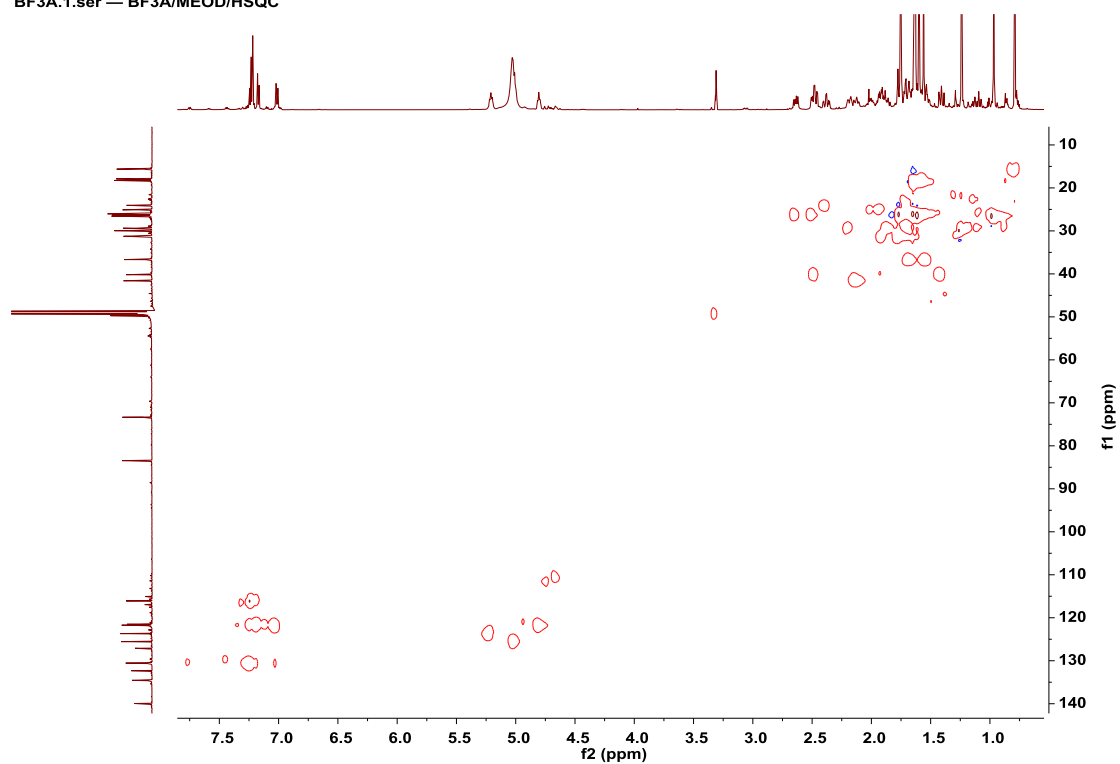

**Figure S36.** HMBC spectrum of coccinone J (**4**) in MeOD

BF3A.2.ser — BF3A/MEOD/HMBC

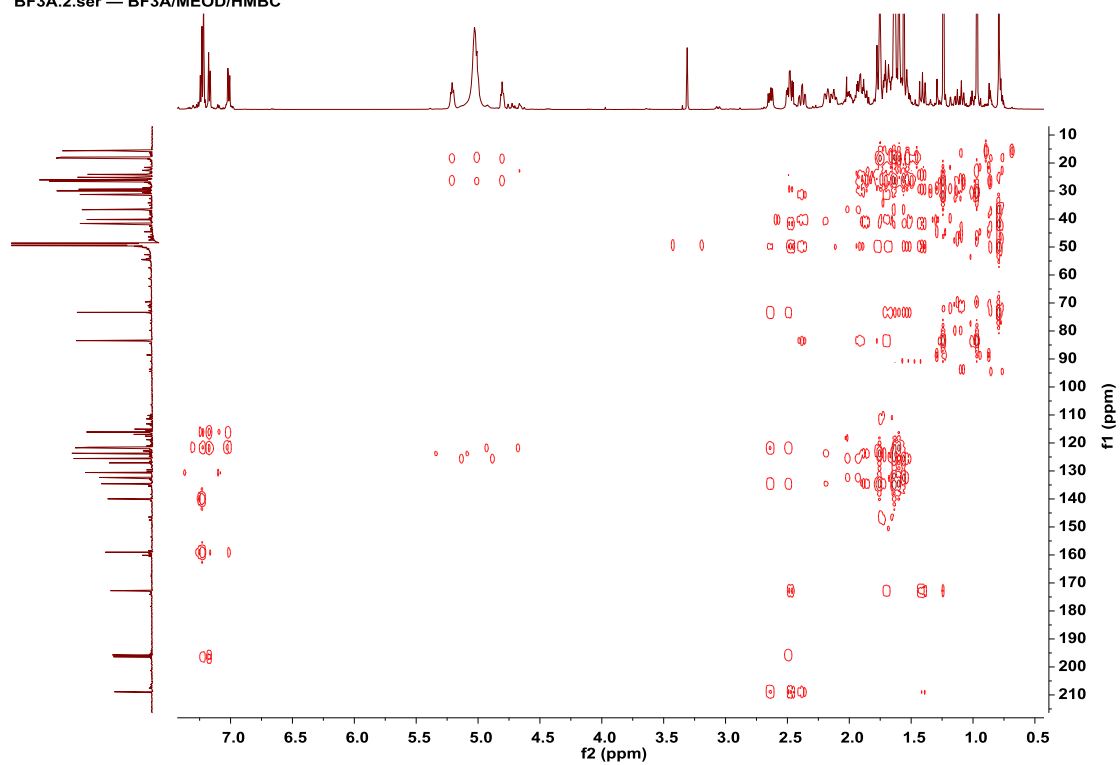

**Figure S37.** ROESY spectrum of coccinone J (**4**) in MeOD

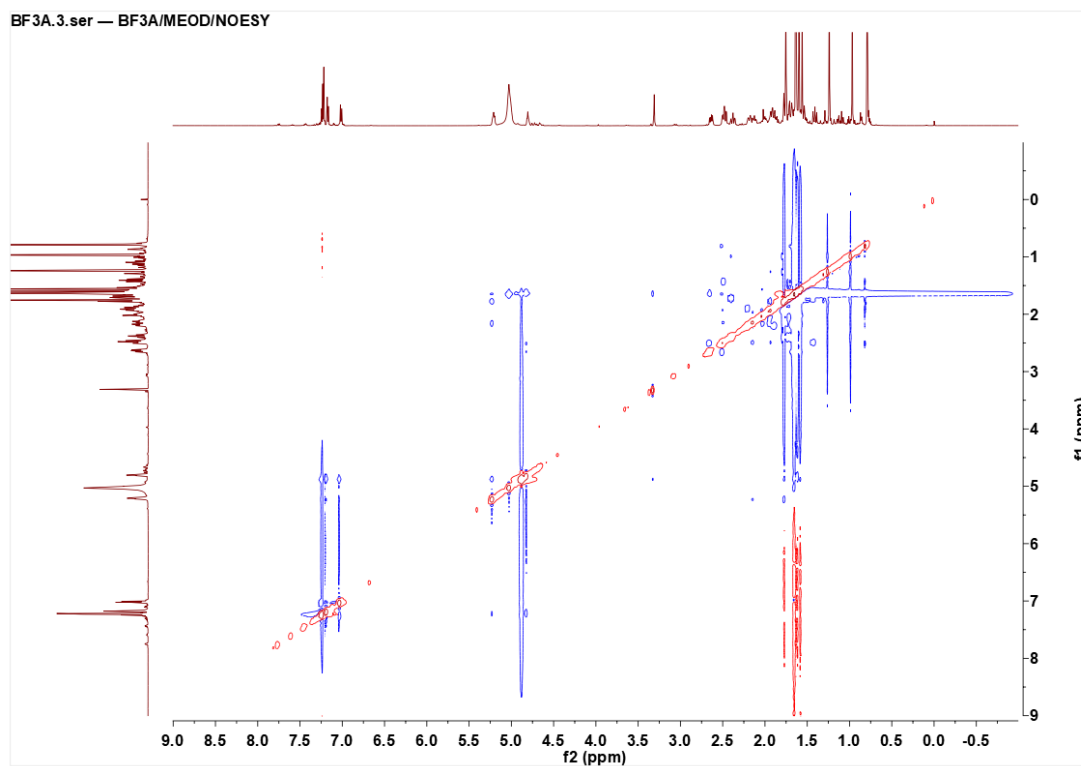

**Figure S38.** IR spectrum of coccinone J (**4**)

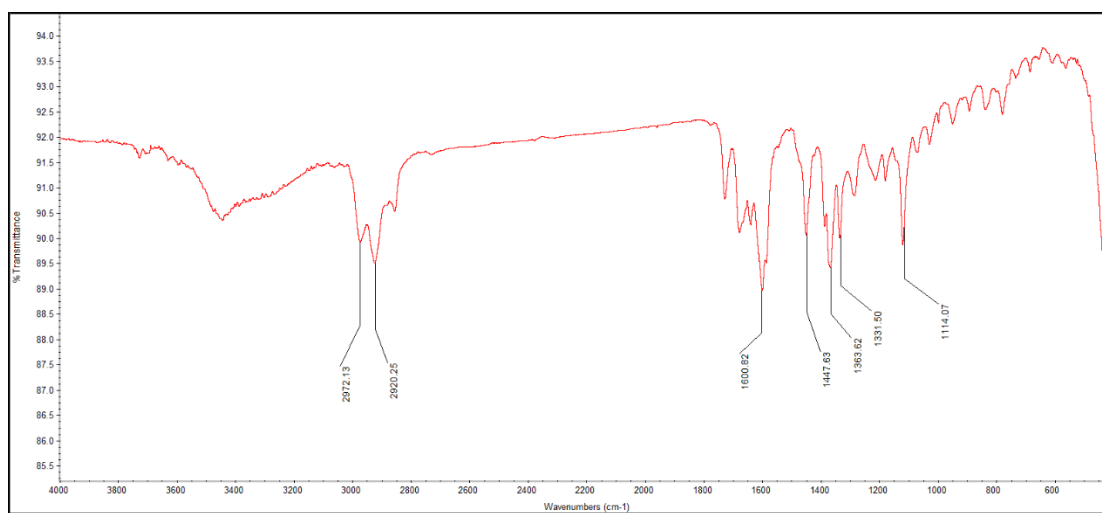

Figure S39. UV spectrum of coccinone J (4)

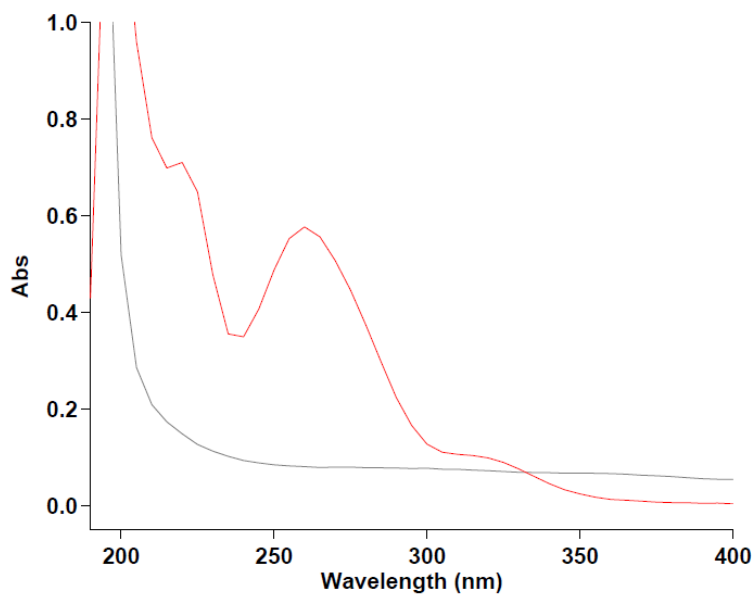

Figure S40. HRESIMS spectrum of coccinone J (4)

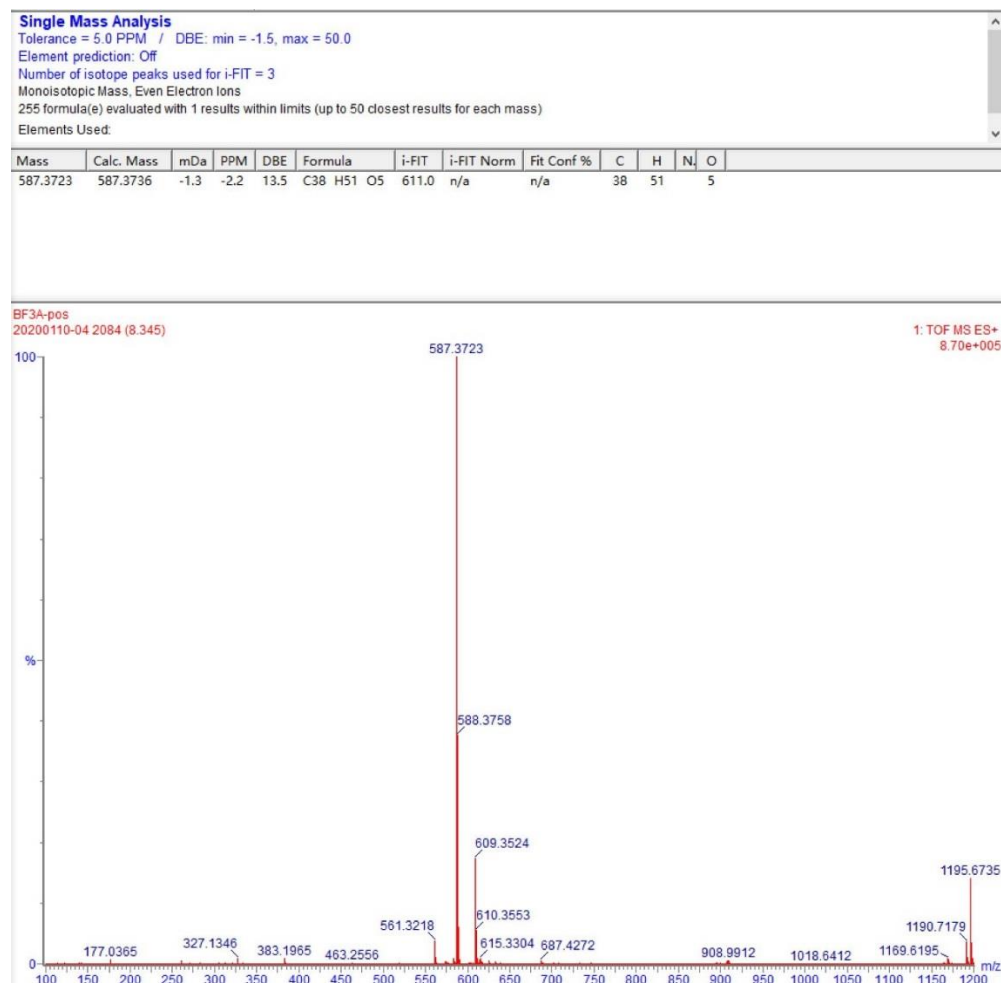

Figure S41. ECD spectrum of coccinone J (4)

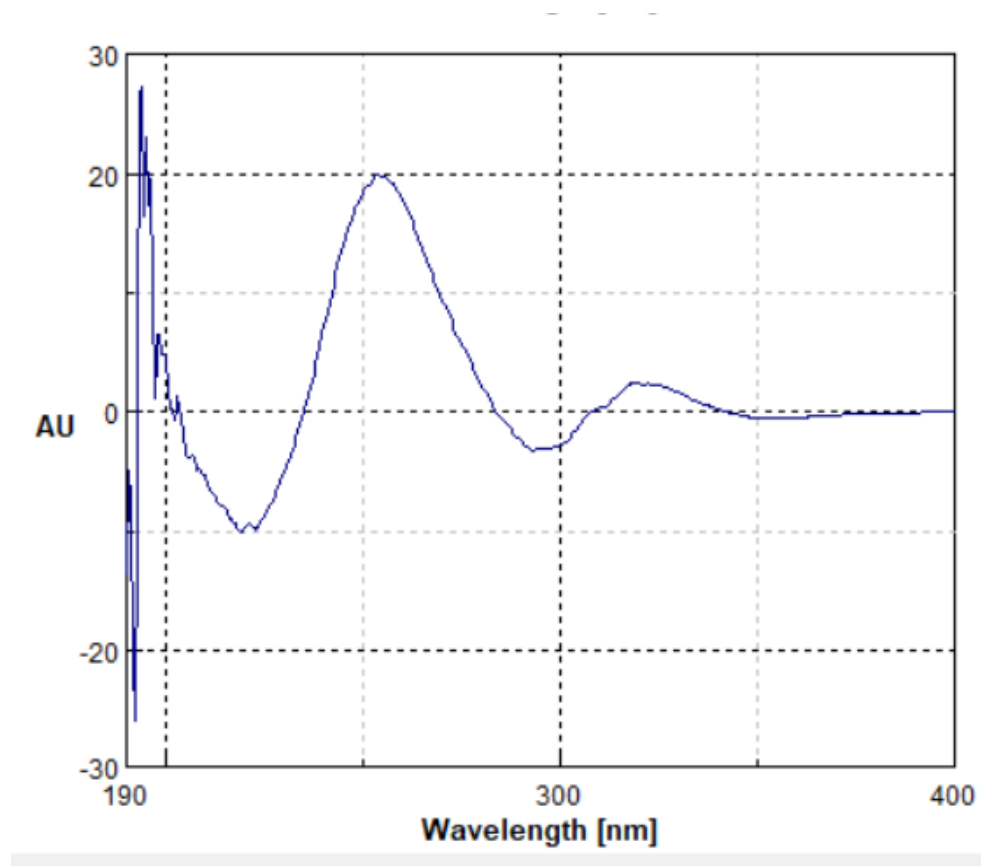

Figure S42.  $^1\text{H}$  NMR spectrum of 6-*epi*-coccinone C (5) in MeOD

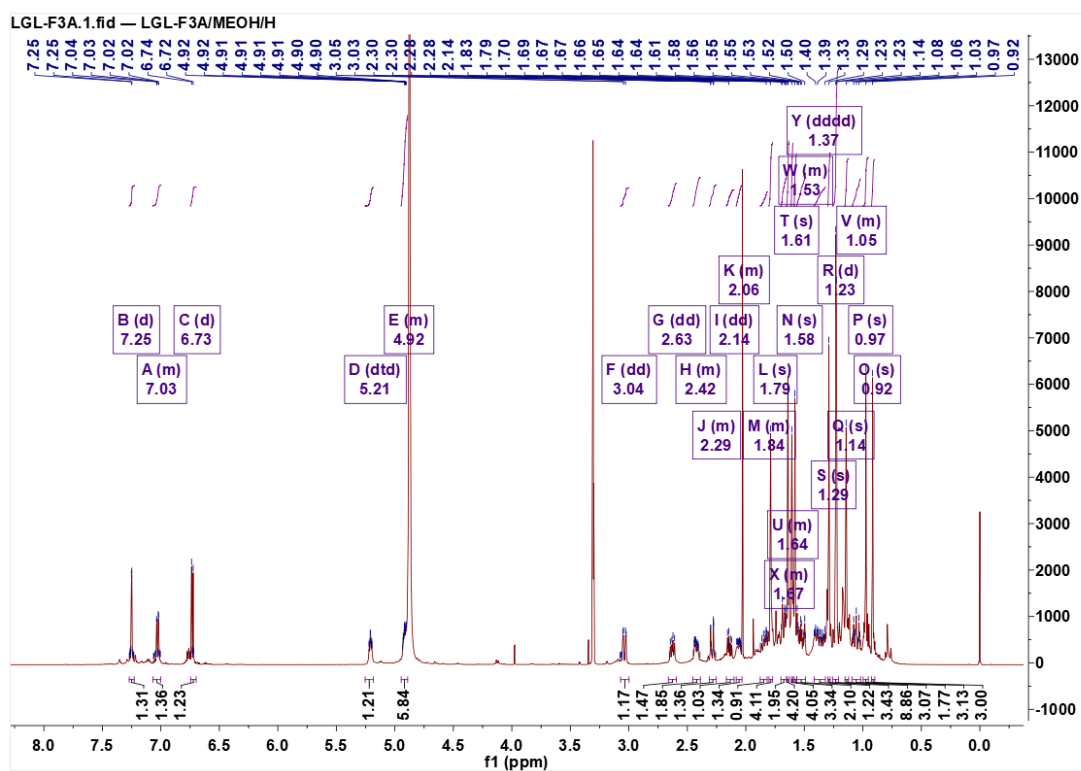



**Figure S43.**  $^{13}\text{C}$  NMR spectrum of 6-*epi*-coccinone C (**5**) in MeOD

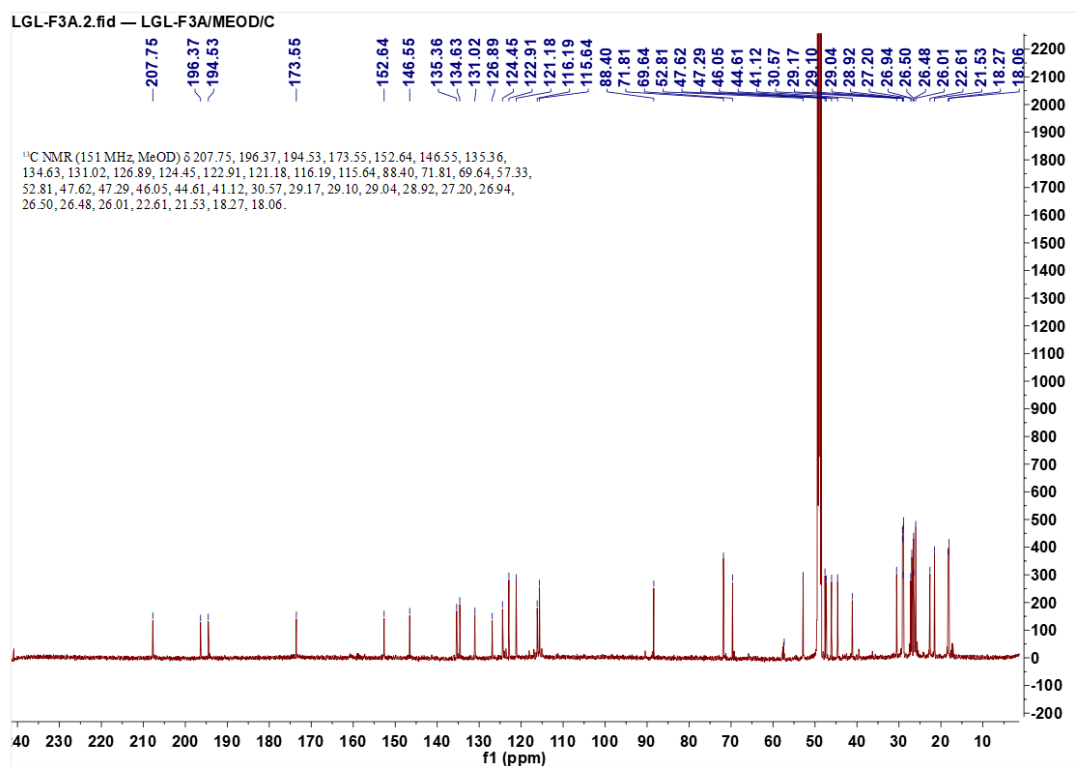

**Figure S44.** DEPT 135 spectrum of 6-*epi*-coccinone C (**5**) in MeOD

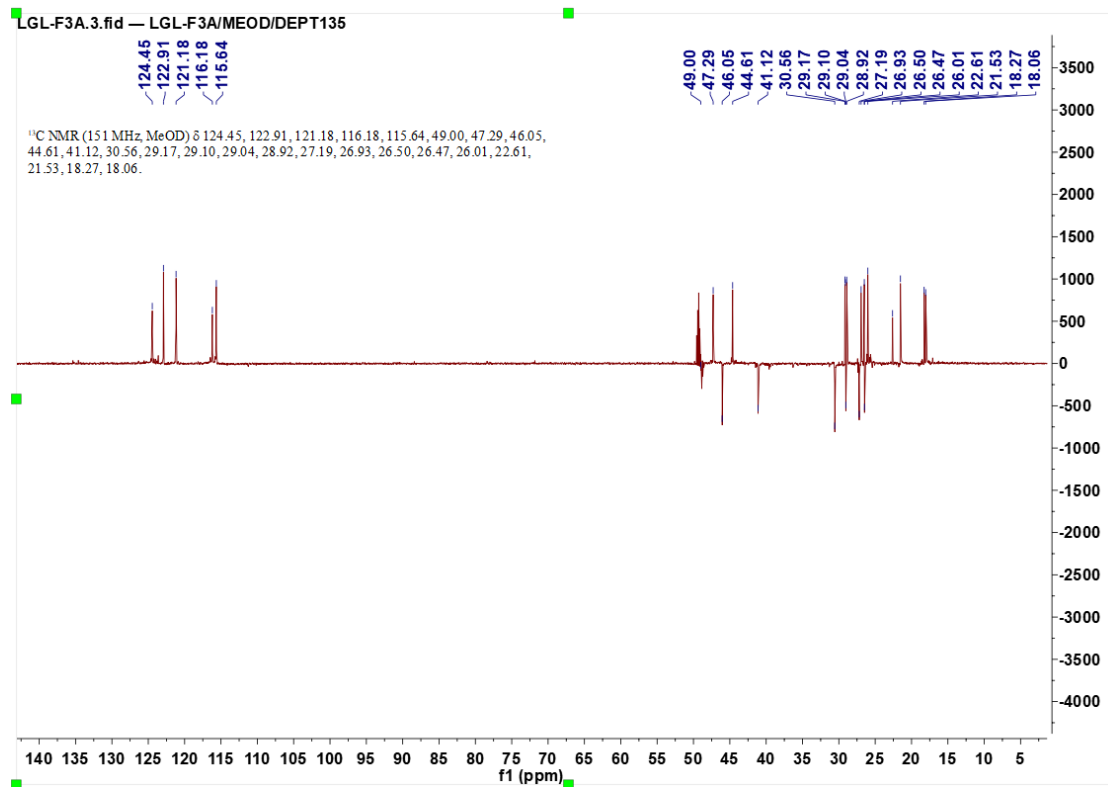

**Figure S45.** HSQC spectrum of 6-*epi*-coccinone C (5) in MeOD

LGL-F3A.4.ser — LGL-F3A/MeOD/HSQC

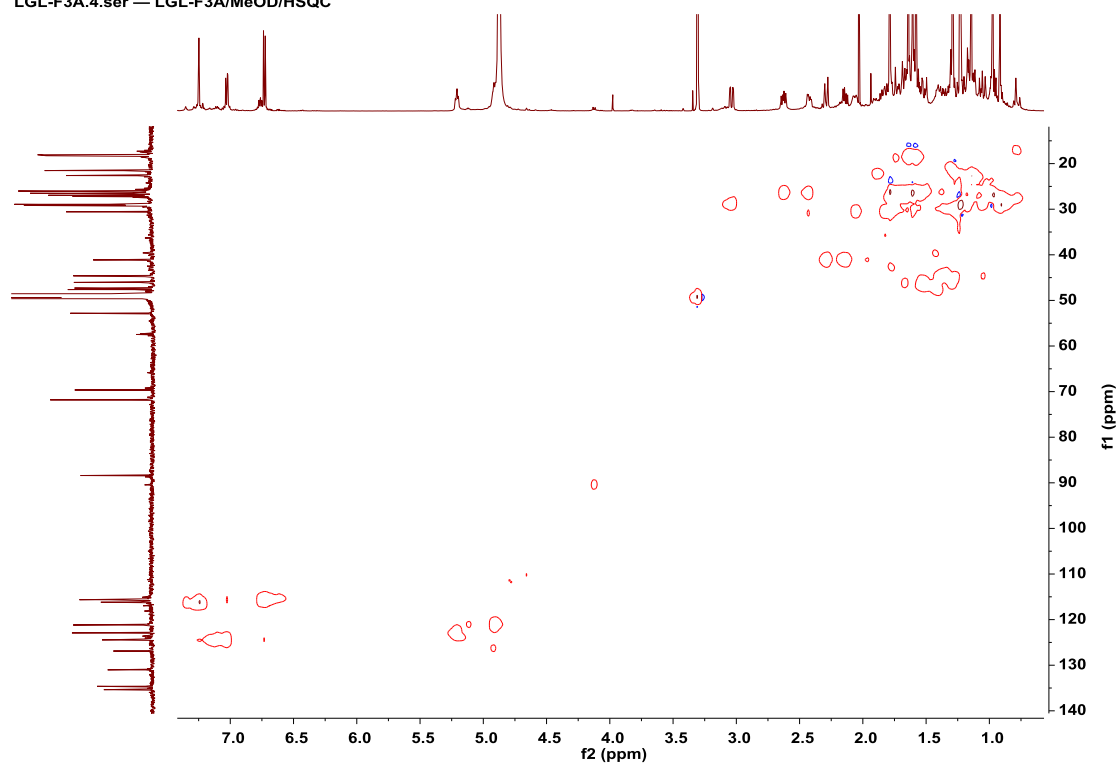

**Figure S46.** HMBC spectrum of 6-*epi*-coccinone C (5) in MeOD

LGL-F3A.5.ser — LGL-F3A/MeOD/HMBC

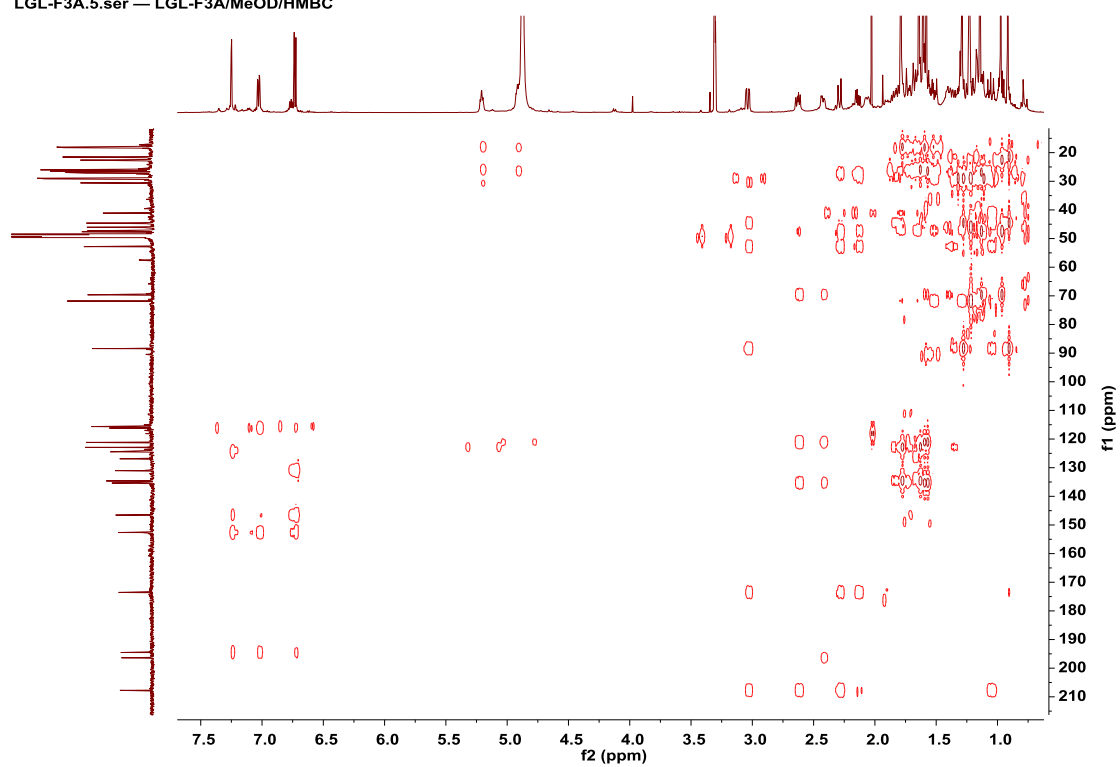

**Figure S47.** ROESY spectrum of 6-*epi*-coccinone C (**5**) in MeOD

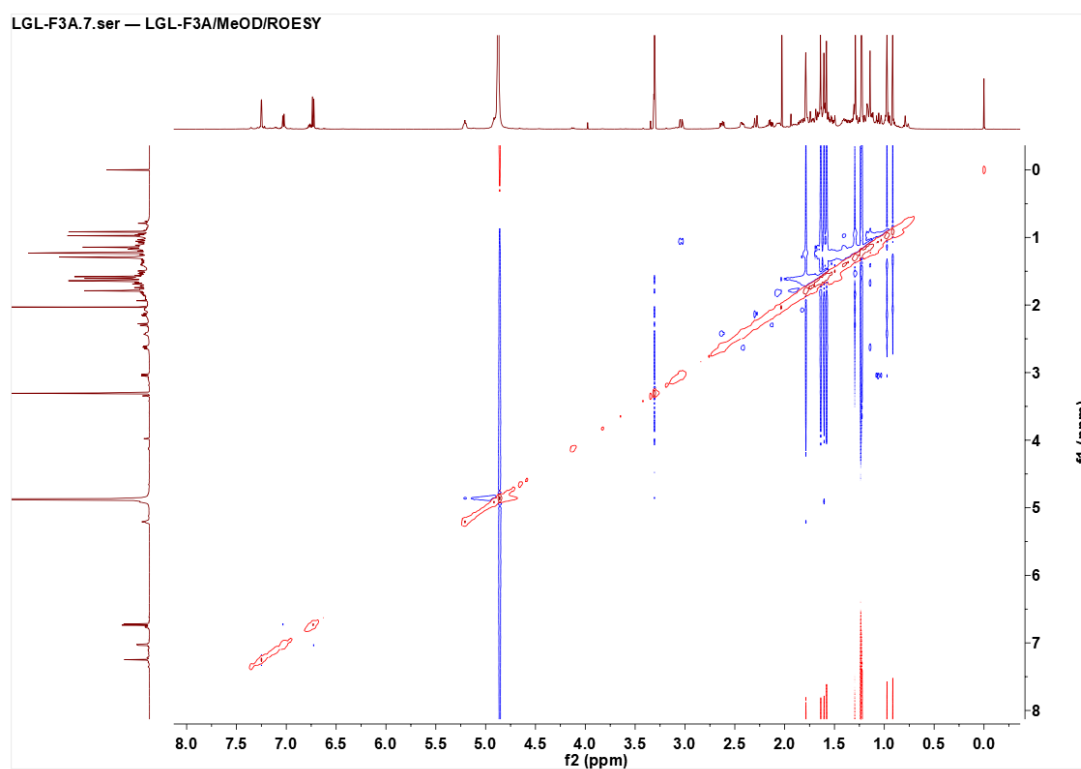

**Figure S48.** IR spectrum of 6-*epi*-coccinone C (**5**)

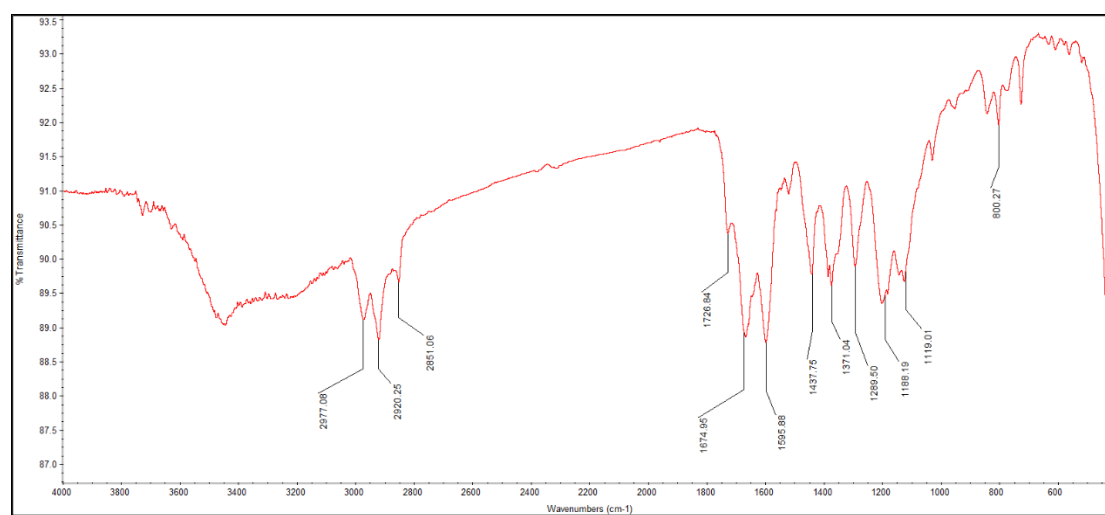

Figure S49. UV spectrum of 6-*epi*-coccinone C (5)

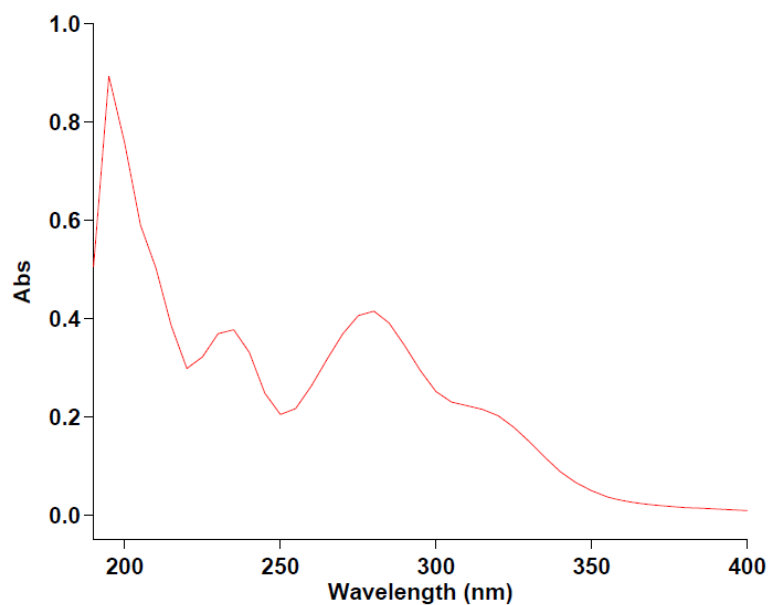

Figure S50. HRESIMS spectrum of 6-*epi*-coccinone C (5)

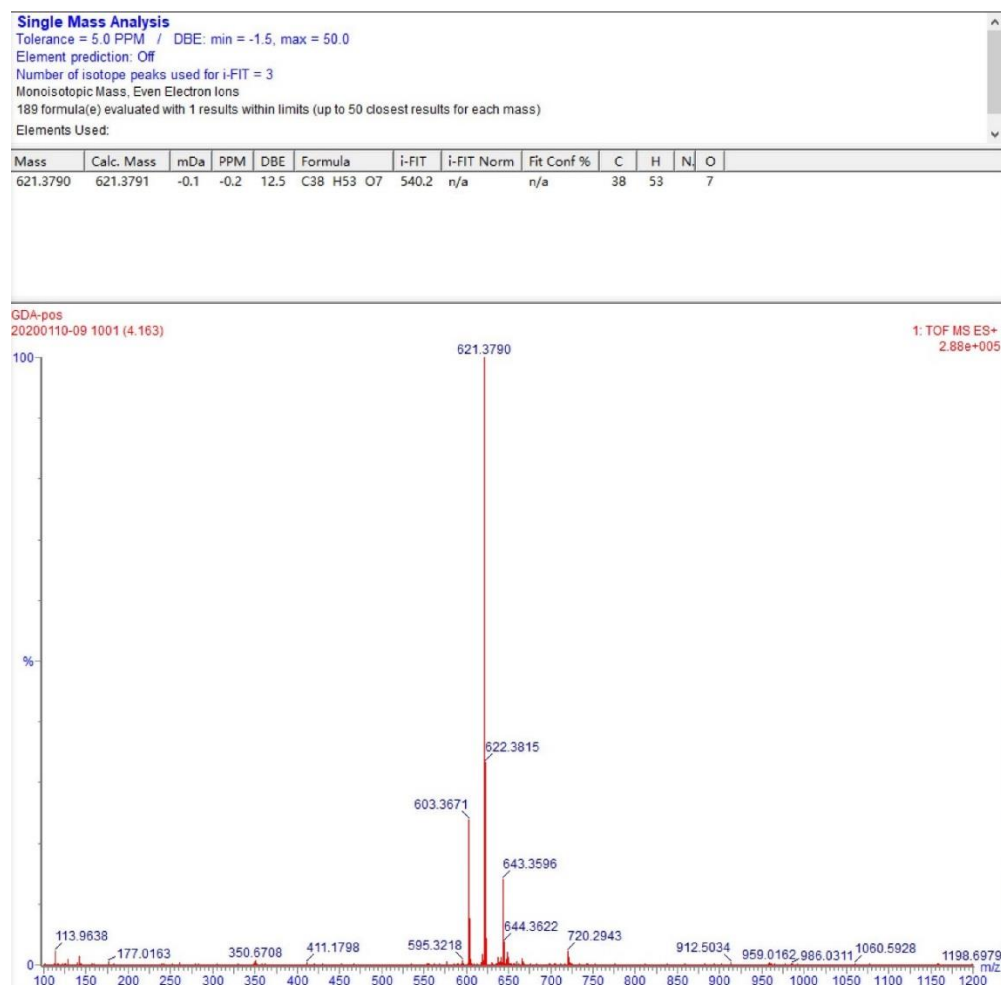

Figure S51. ECD spectrum of 6-*epi*-coccinone C (5)

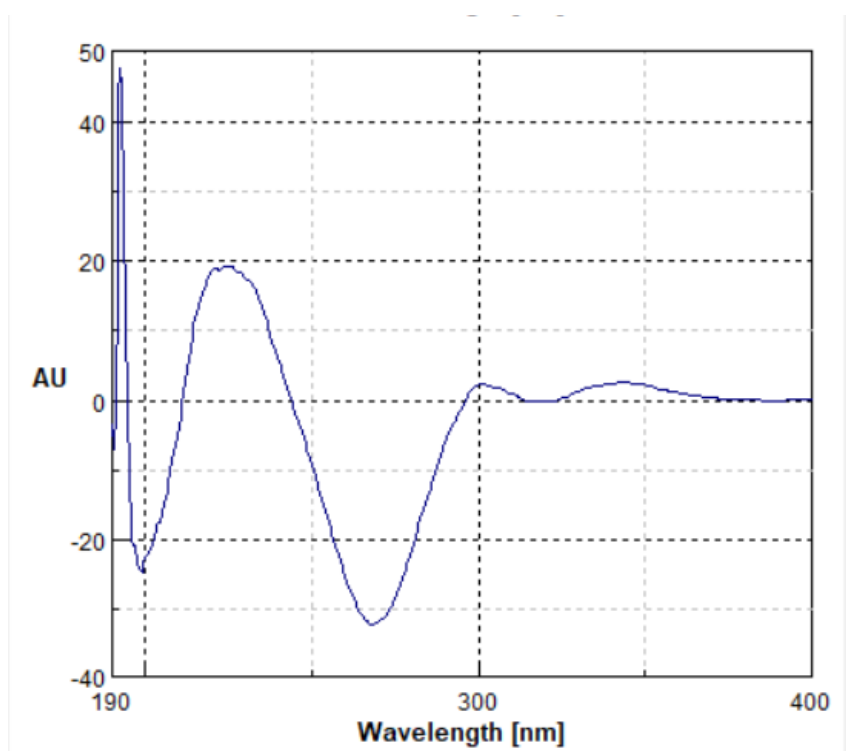

Figure S52.  $^1\text{H}$  NMR spectrum of coccinone I (6) in MeOD

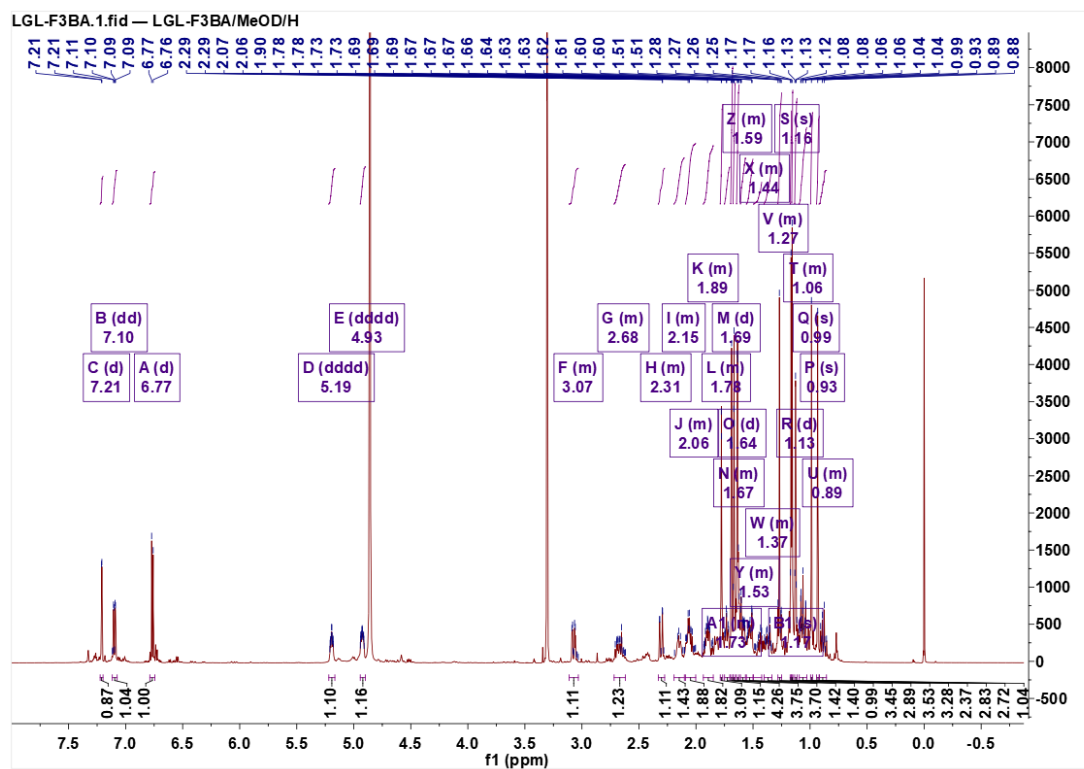

**Figure S53.**  $^{13}\text{C}$  NMR spectrum of coccinone I (**6**) in MeOD

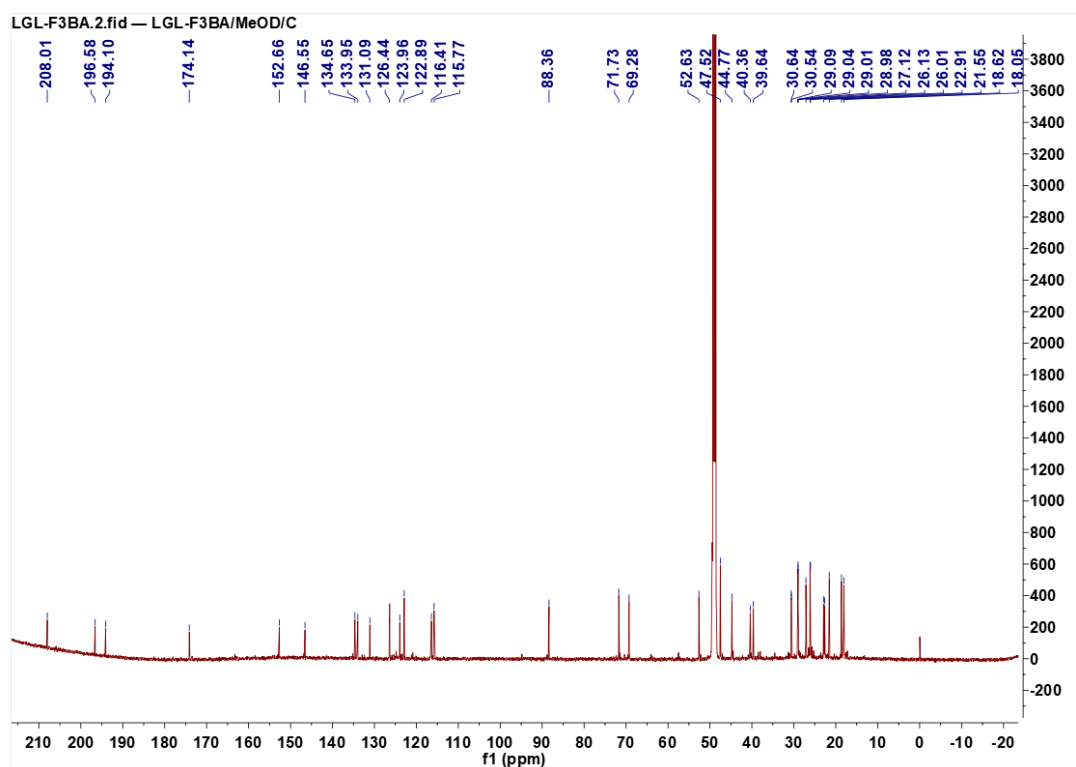

**Figure S54.** DEPT 135 spectrum of coccinone I (**6**) in MeOD

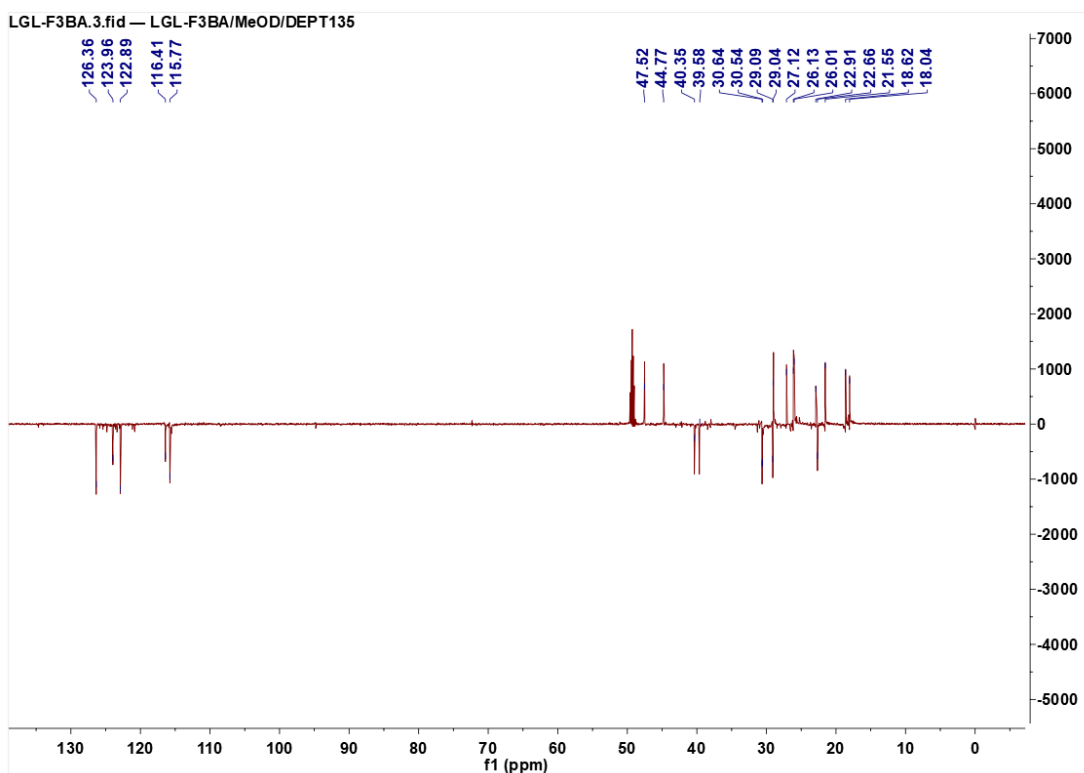

Figure S55. HSQC spectrum of coccinone I (**6**) in MeOD

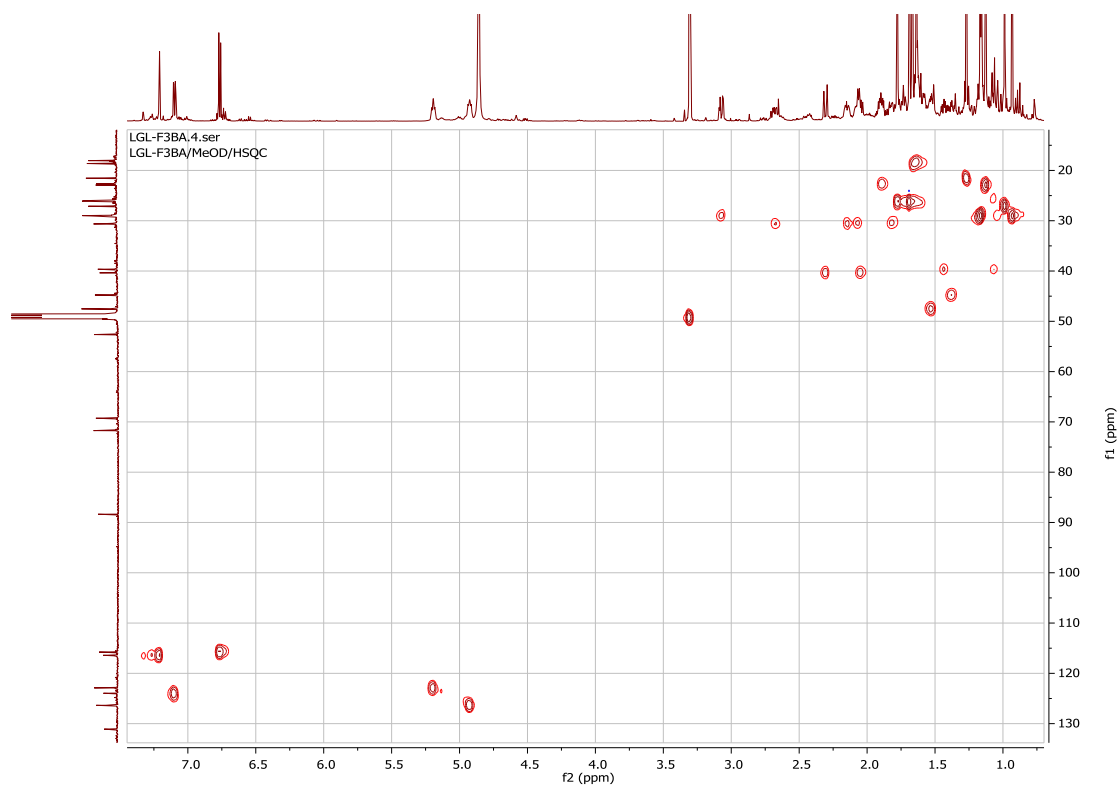

Figure S56. HMBC spectrum of coccinone I (**6**) in MeOD

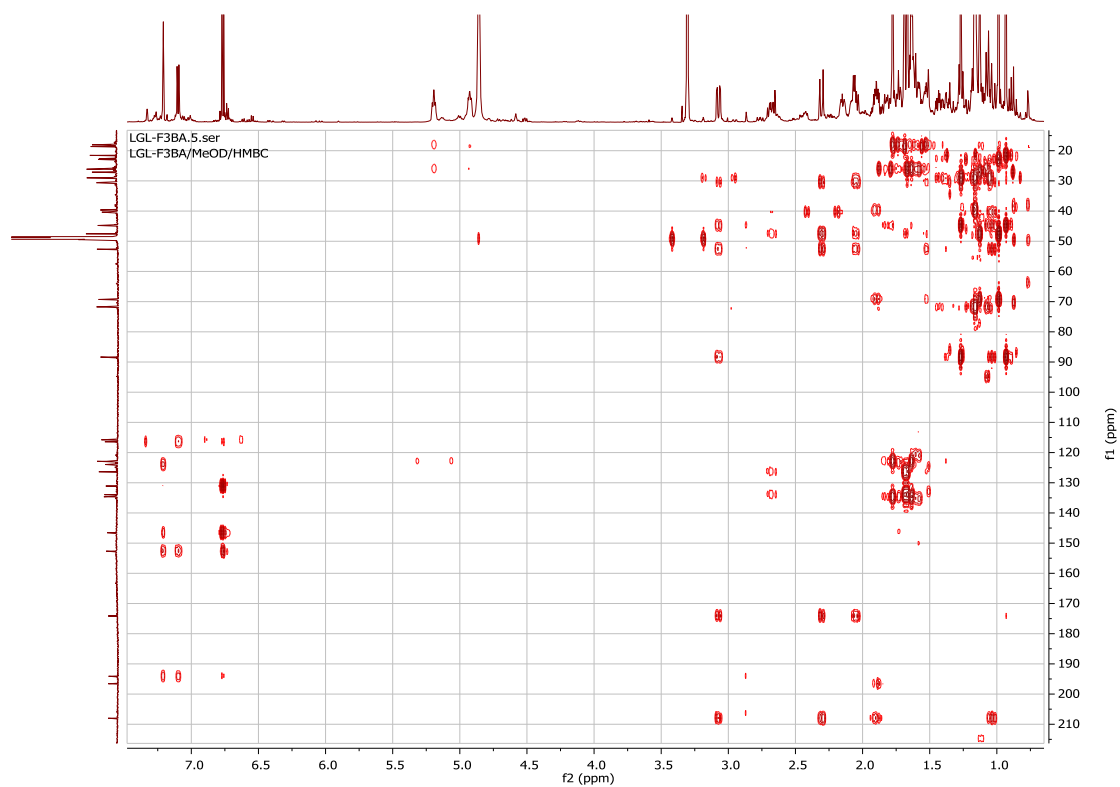

Figure S57. ROESY spectrum of coccinone I (6) in MeOD

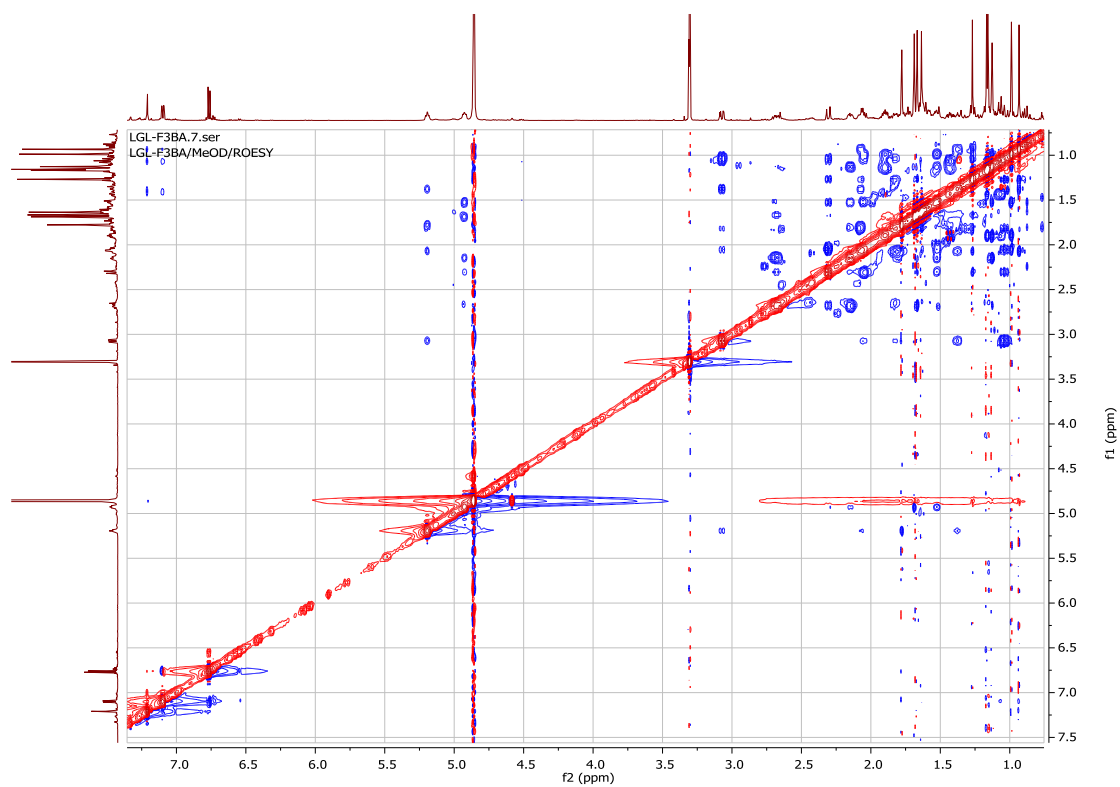

Figure S58. IR spectrum of coccinone I (6)

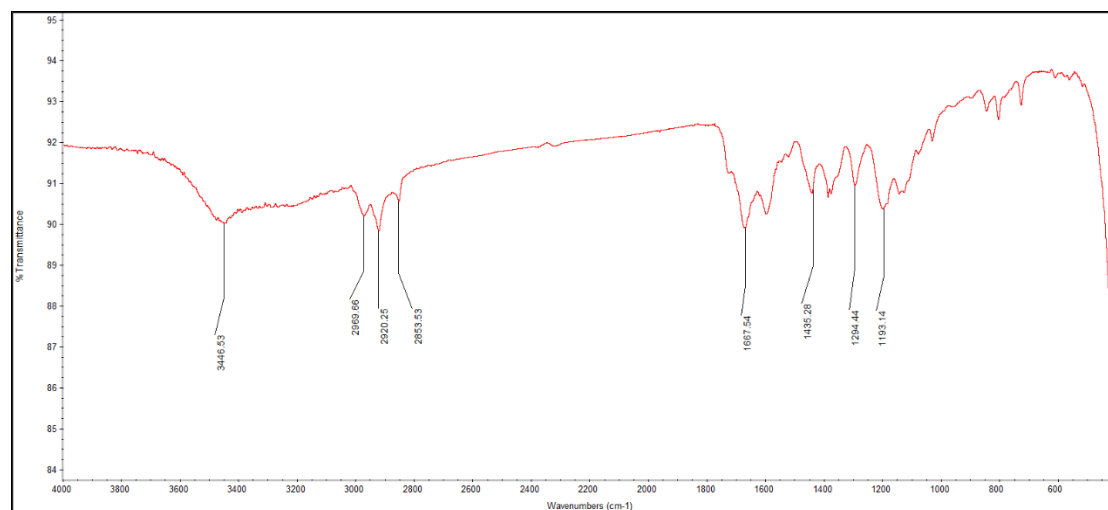



Figure S59. UV spectrum of coccinone I (6)

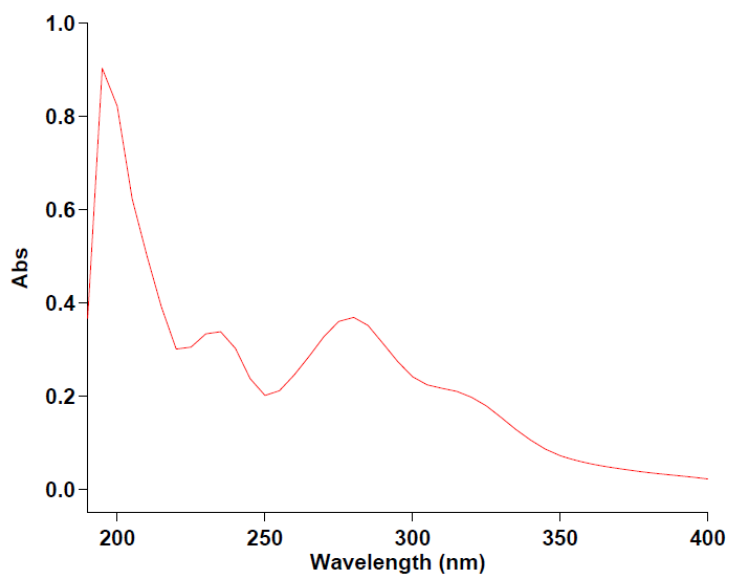

Figure S60. HRESIMS spectrum of coccinone I (6)

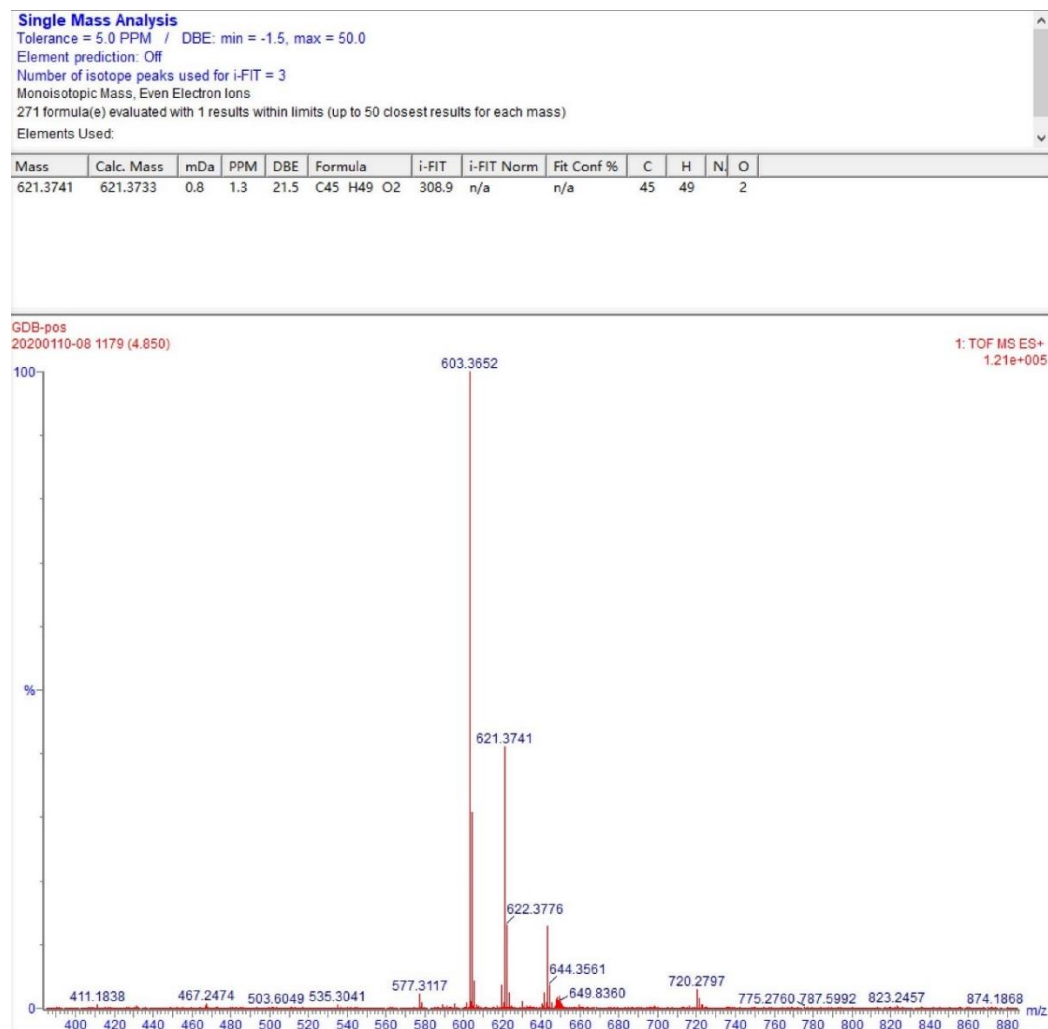

Figure S61. ECD spectrum of coccinone I (6)

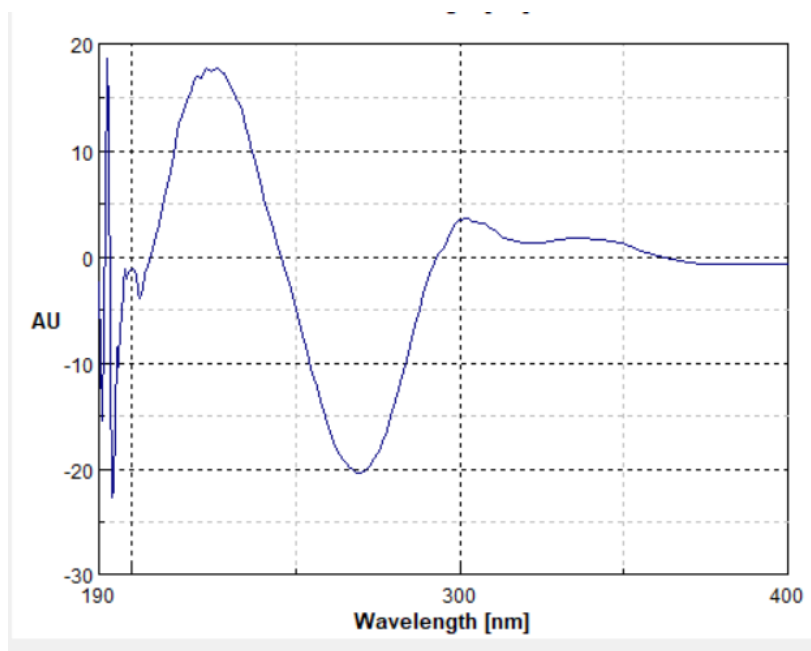

Figure S62.  $^1\text{H}$  NMR spectrum of 36-hydroxy-guttifeone J (7) in MeOD

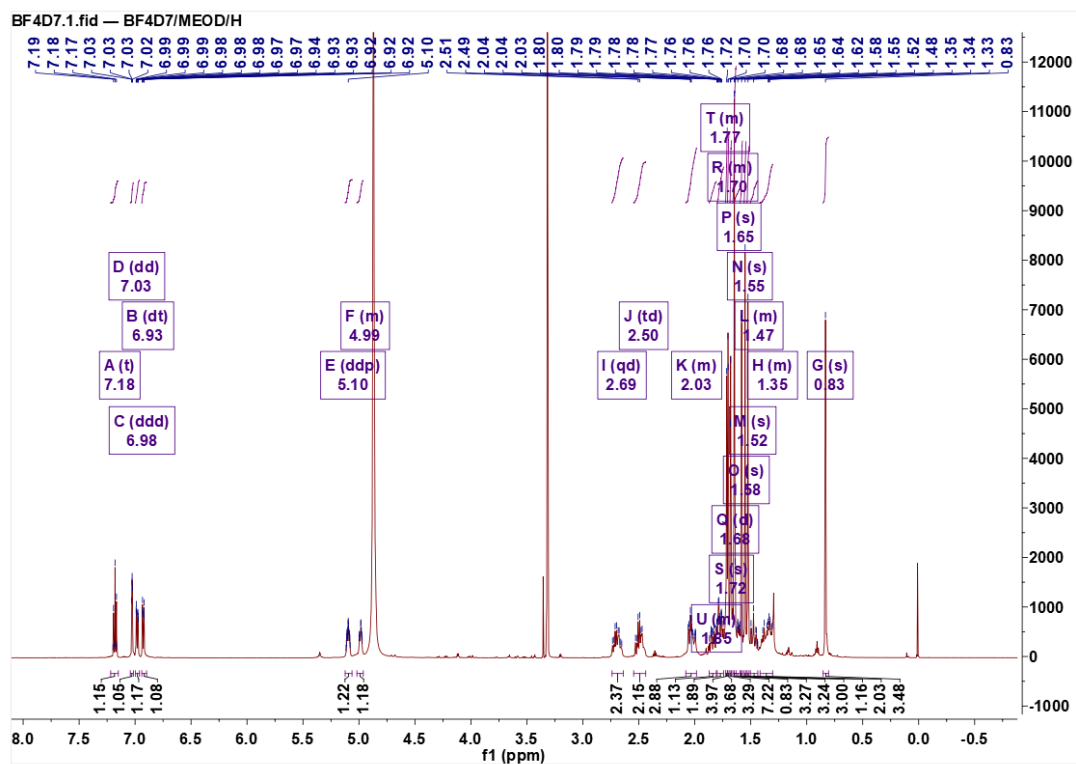

**Figure S63.**  $^{13}\text{C}$  NMR spectrum of 36-hydroxy-guttifeone J (**7**) in MeOD

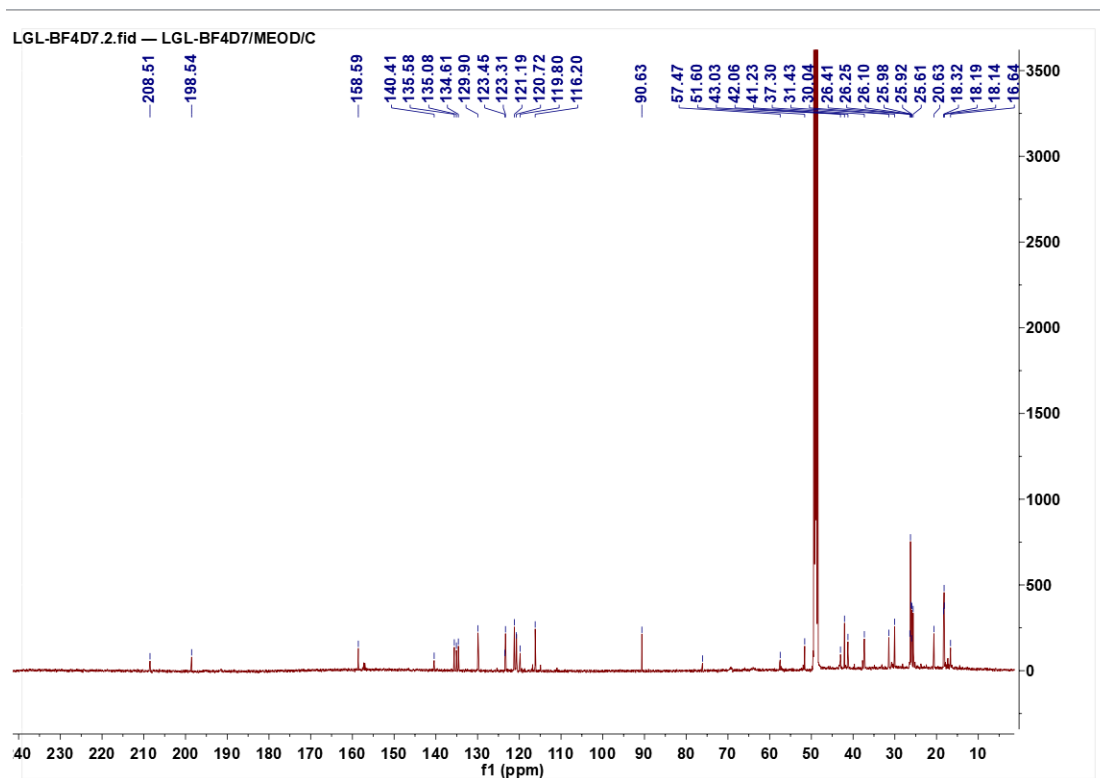

**Figure S64.** DEPT 135 spectrum of 36-hydroxy-guttifeone J (**7**) in MeOD

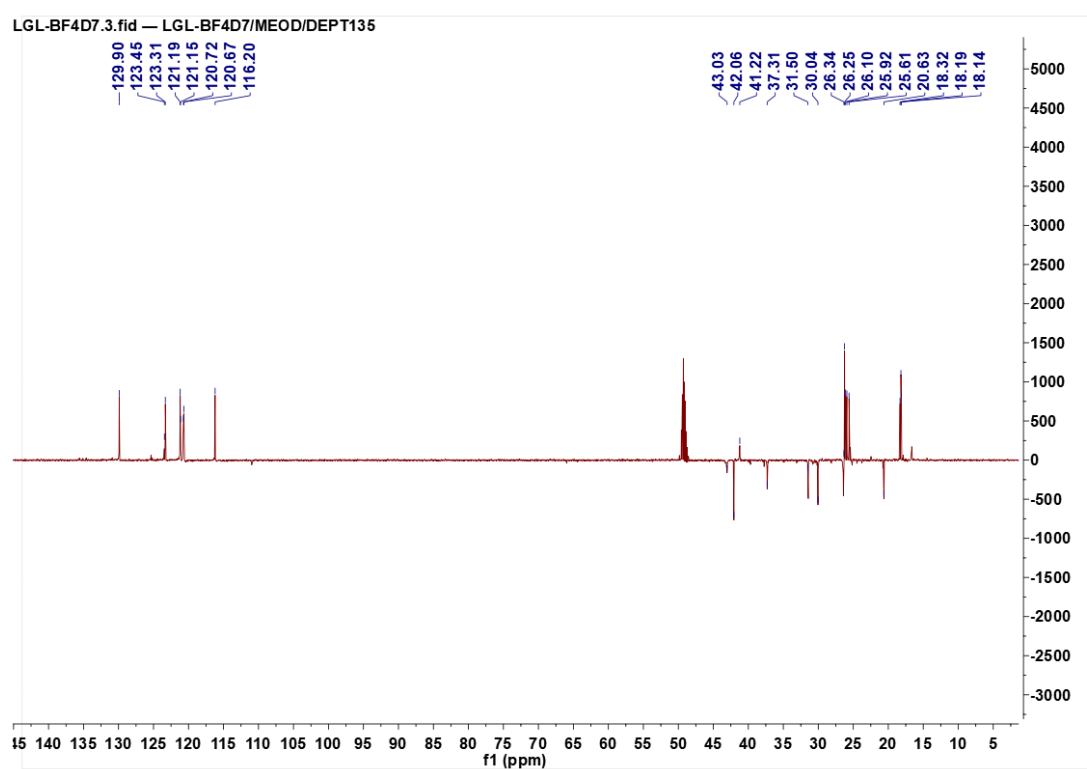

Figure S65. HSQC spectrum of 36-hydroxy-guttifeone J (7) in MeOD

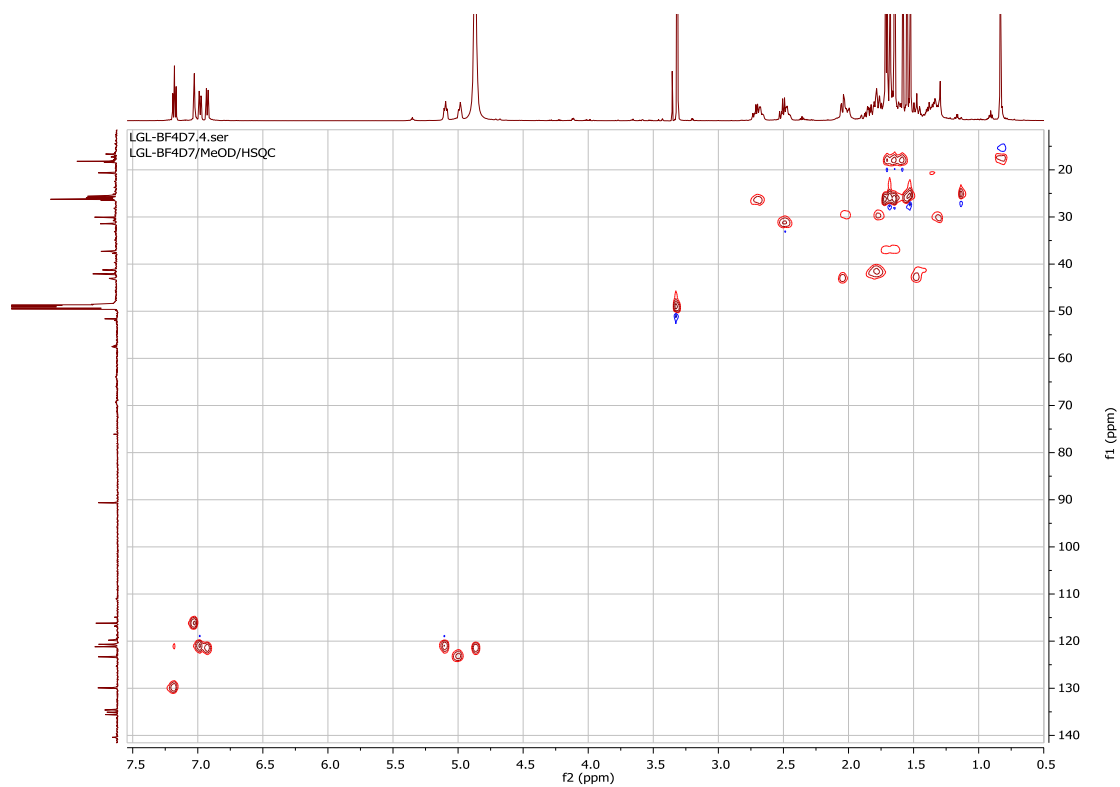

Figure S66. HMBC spectrum of 36-hydroxy-guttifeone J (7) in MeOD

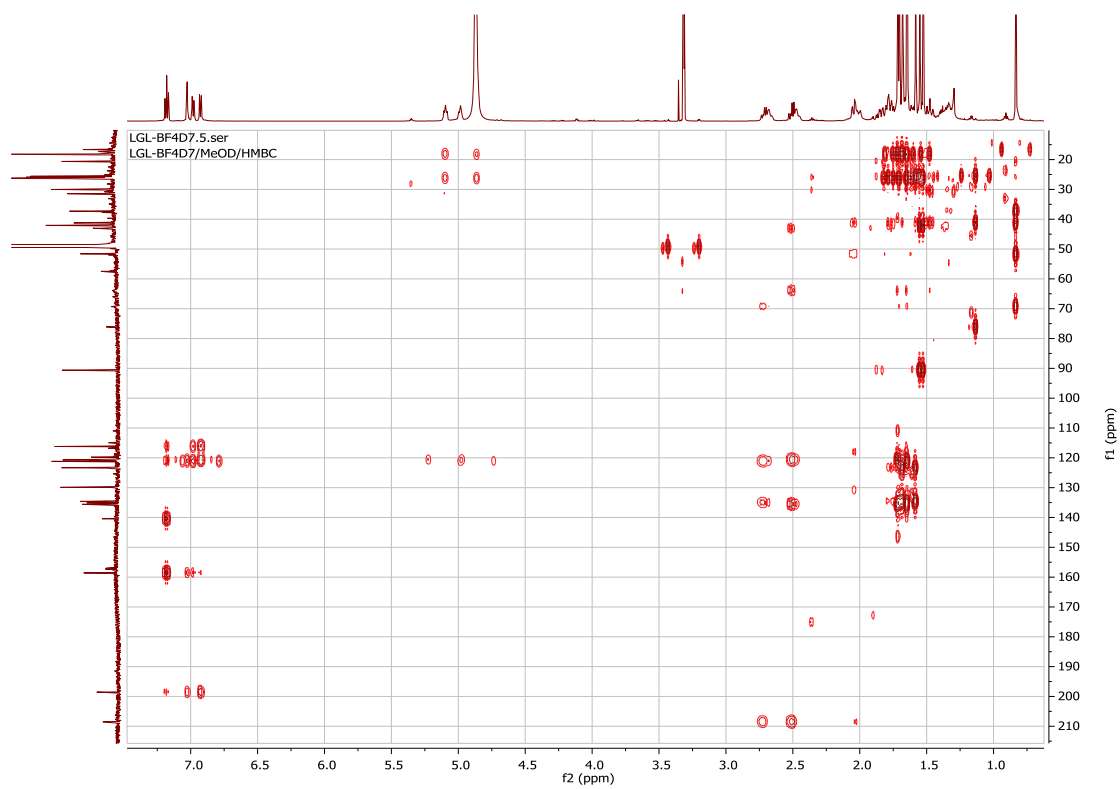

**Figure S67.** ROESY spectrum of 36-hydroxy-guttifeone J (**7**) in MeOD

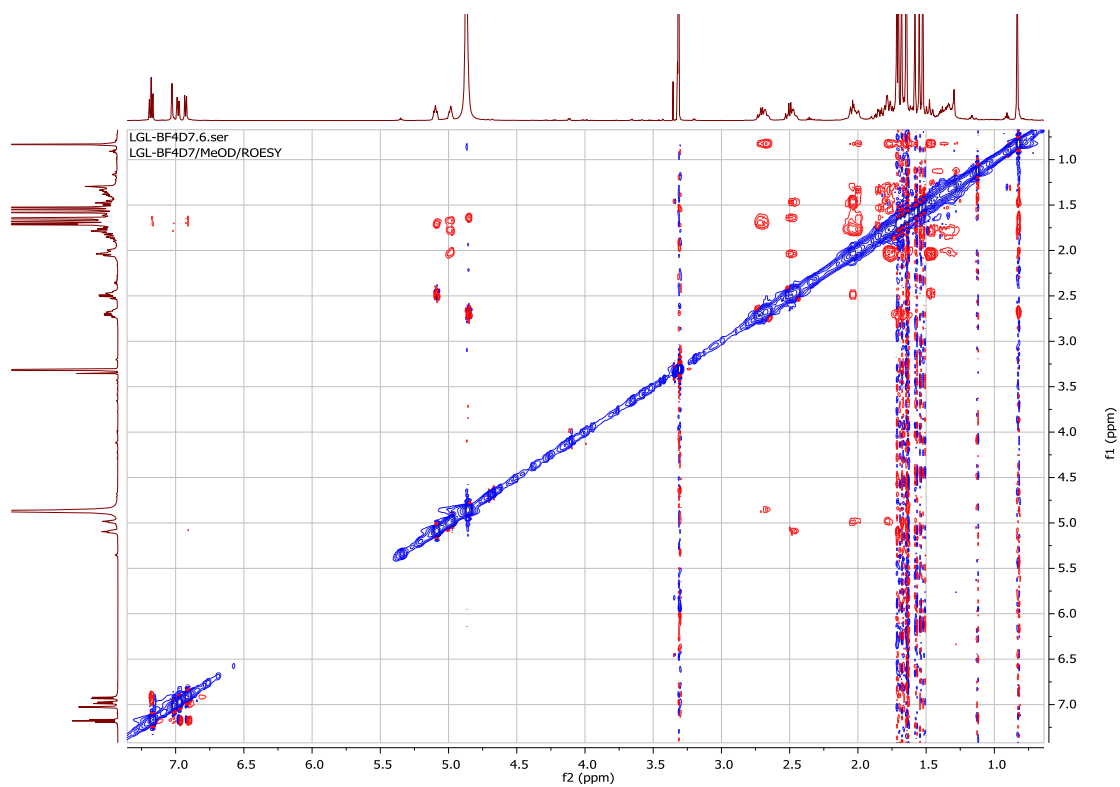

**Figure S68.** IR spectrum of 36-hydroxy-guttifeone J (**7**)

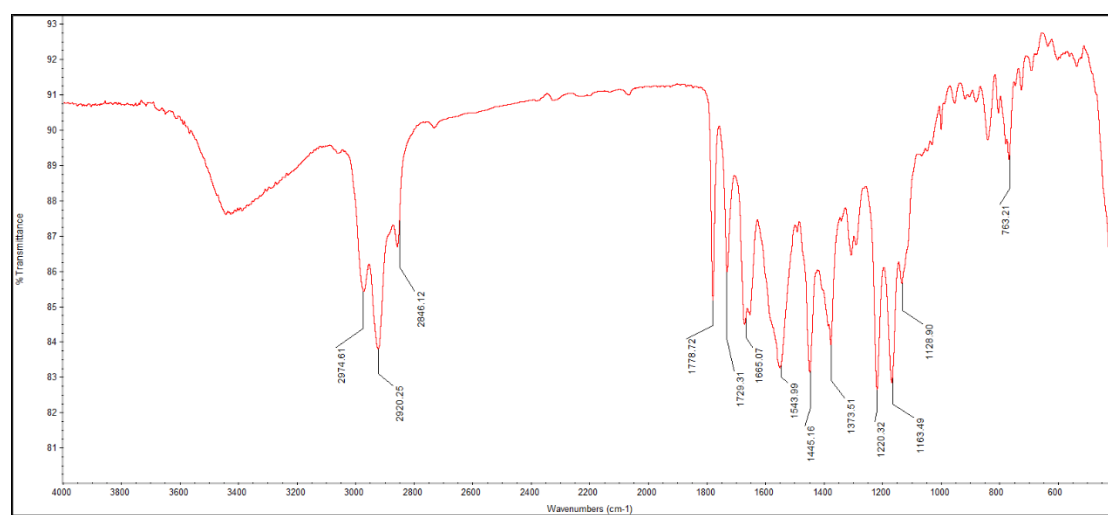

**Figure S69.** UV spectrum of 36-hydroxy-guttifeone J (7)

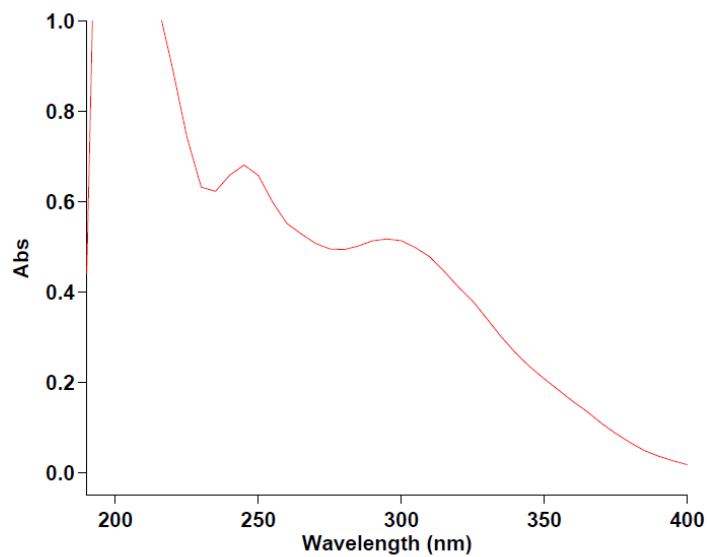

**Figure S70.** HRESIMS spectrum of 36-hydroxy-guttifeone J (7)

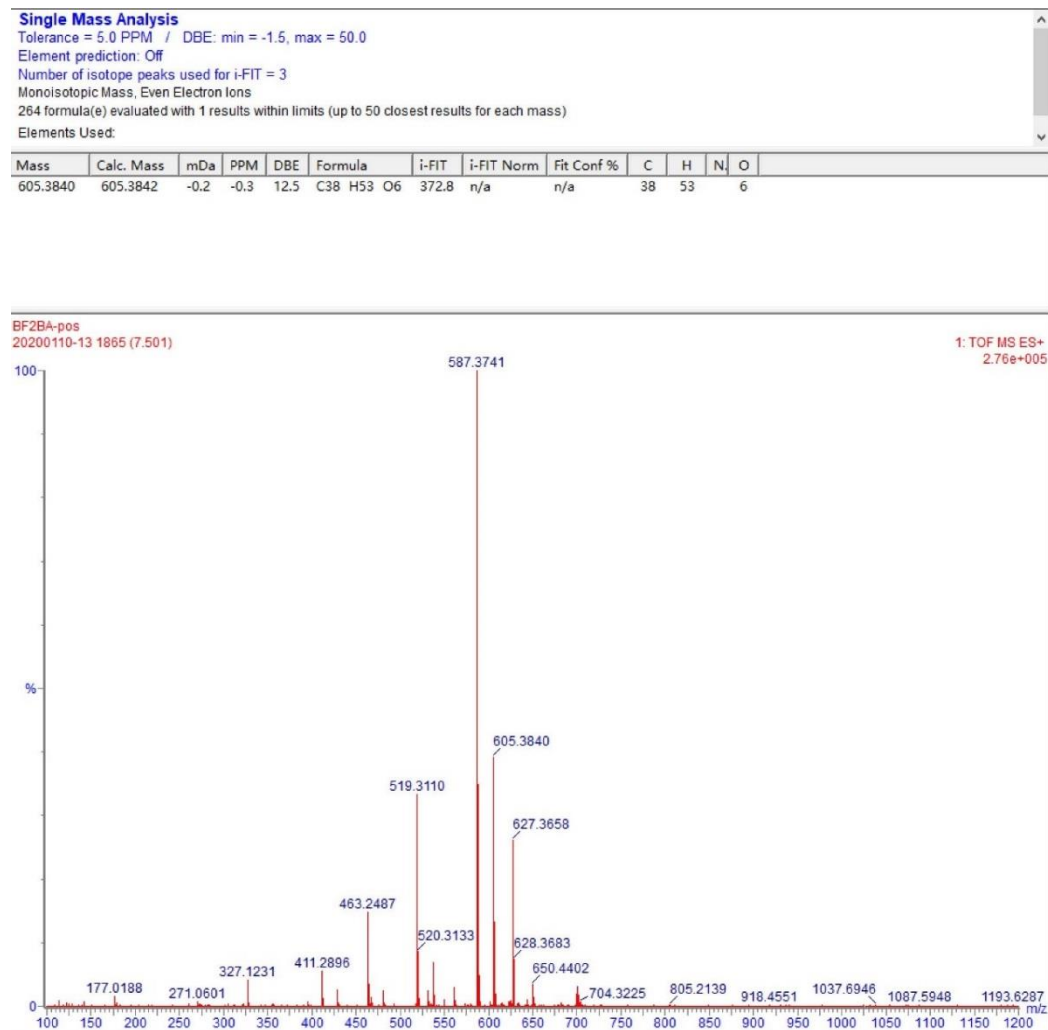

Figure S71. ECD spectrum of 36-hydroxy-guttifeone J (**7**)

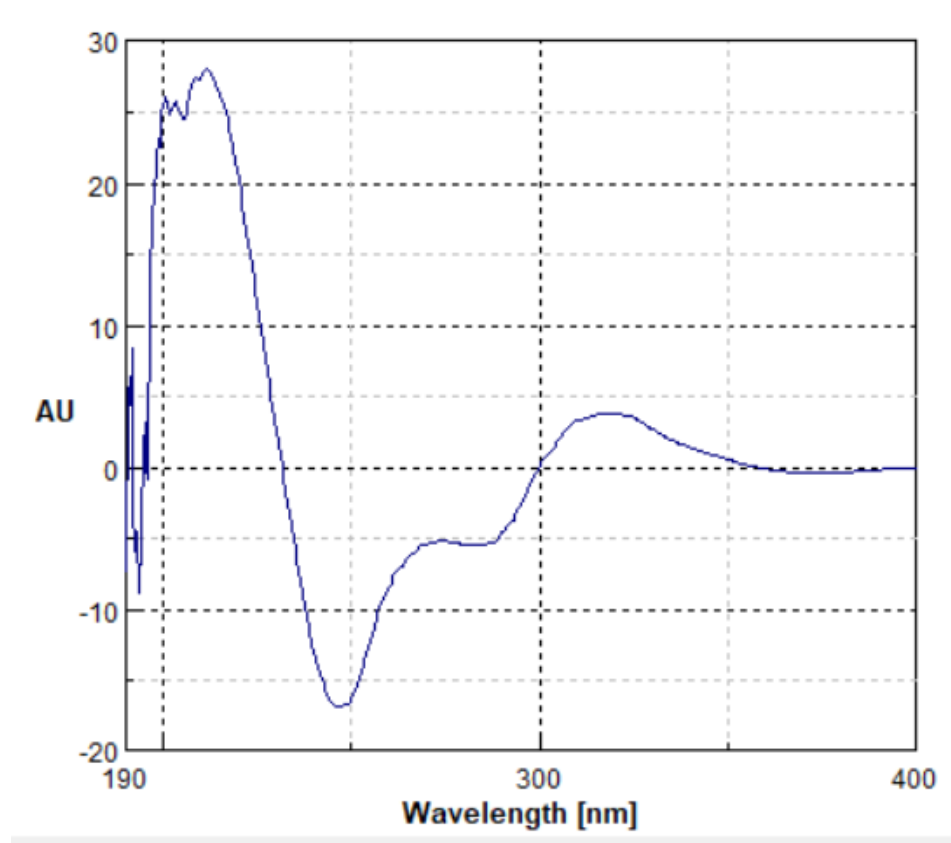

Figure S72.  $^1\text{H}$  NMR spectrum of multiflorone I (**8**) in MeOD

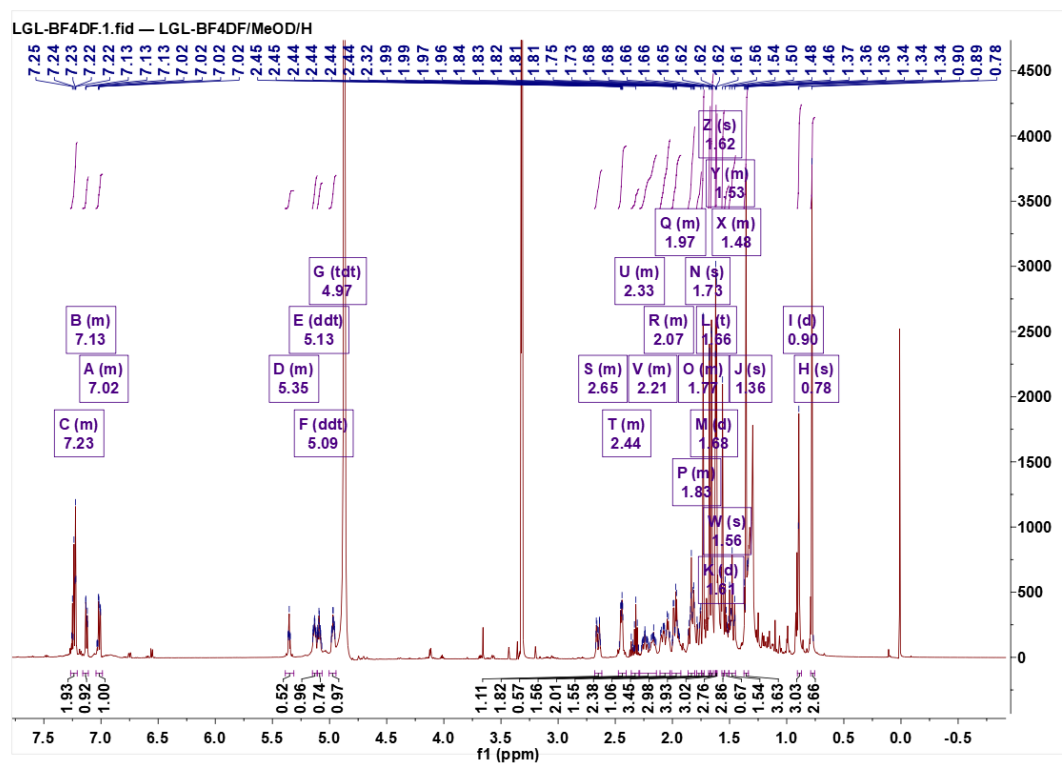

Figure S73.  $^{13}\text{C}$  NMR spectrum of multiflorone I (**8**) in MeOD

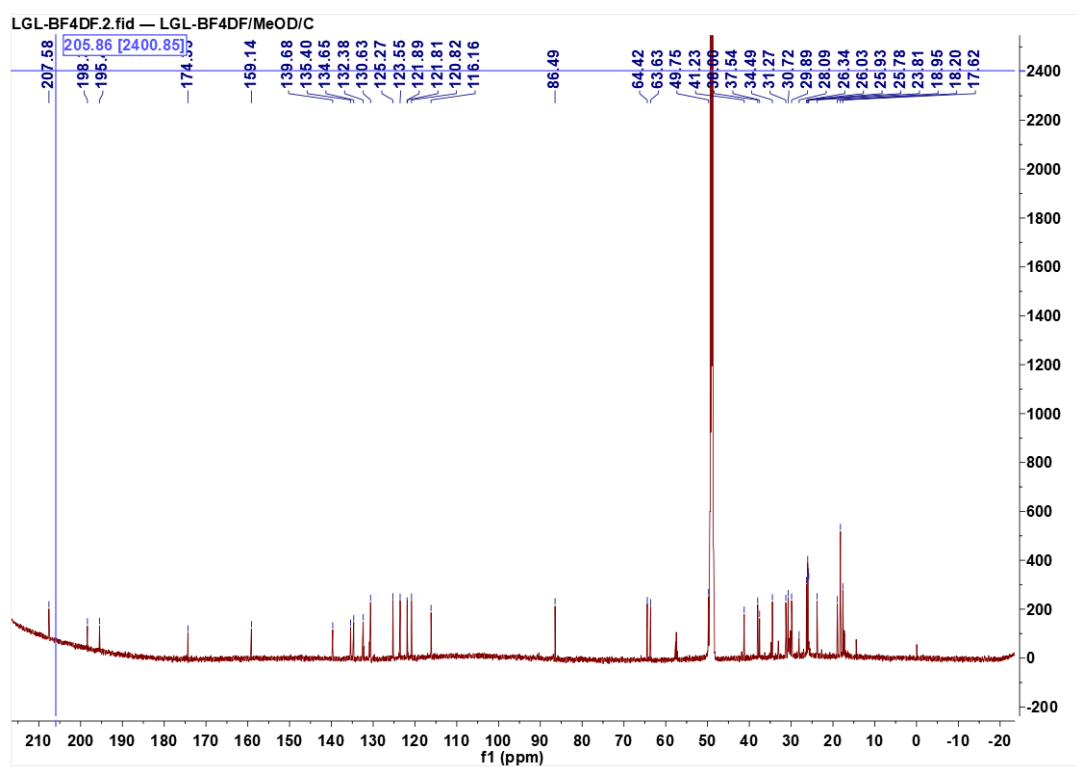

Figure S74. DEPT 135 spectrum of multiflorone I (**8**) in MeOD

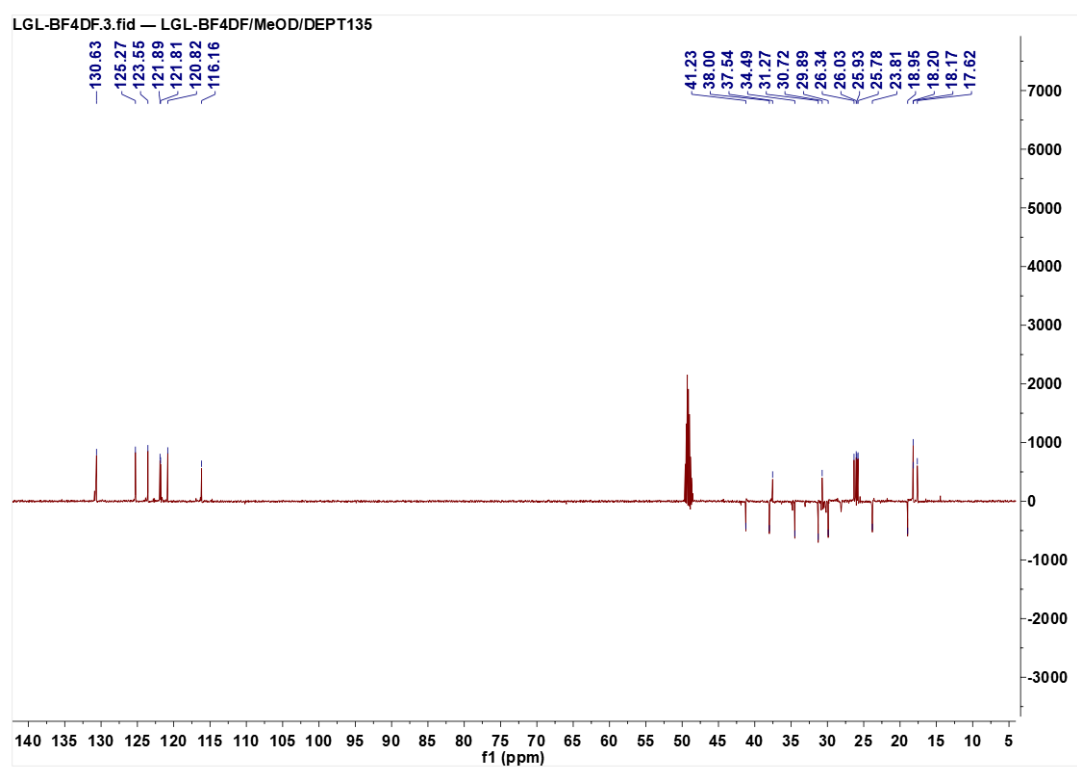



Figure S75. HSQC spectrum of multiflorone I (**8**) in MeOD

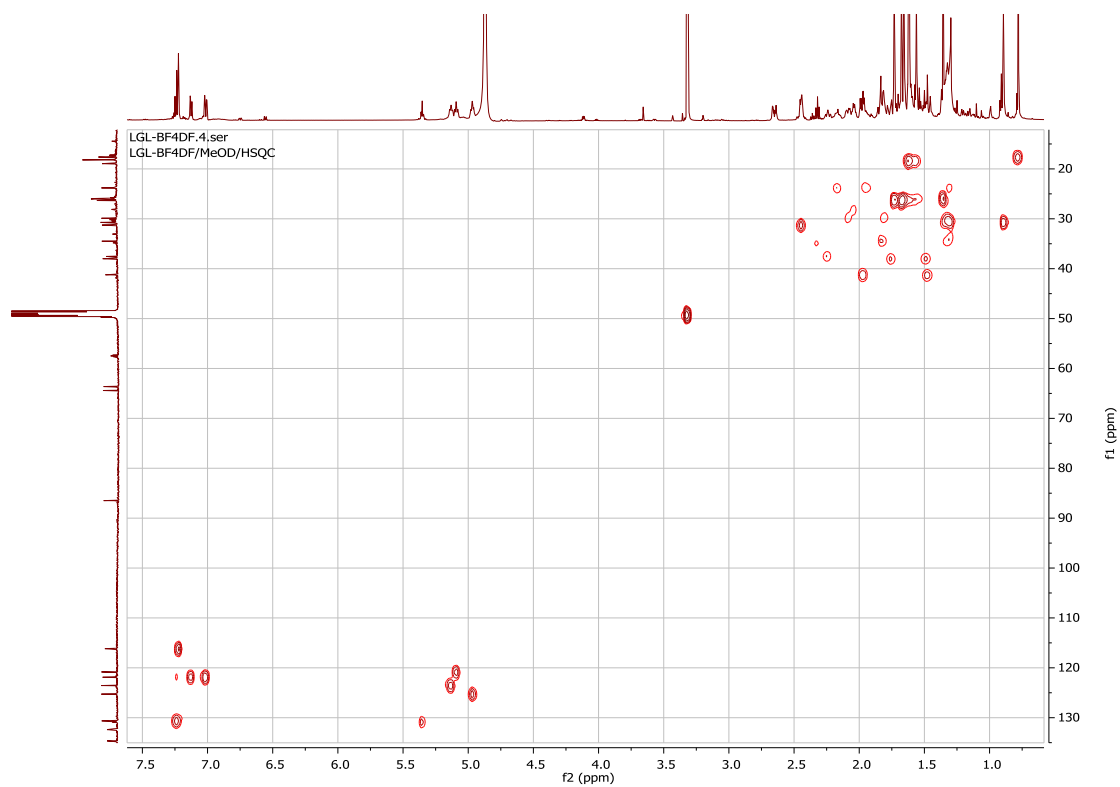

Figure S76. HMBC spectrum of multiflorone I (**8**) in MeOD

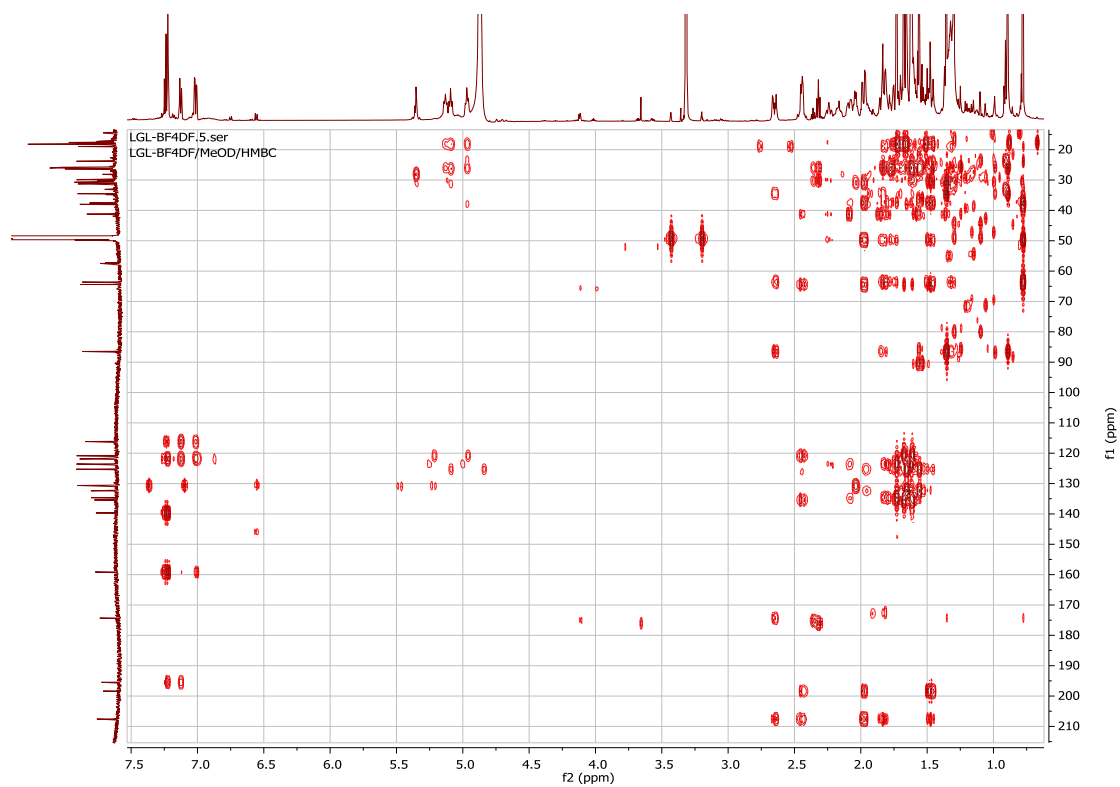

**Figure S77.** ROESY spectrum of multiflorone I (**8**) in MeOD

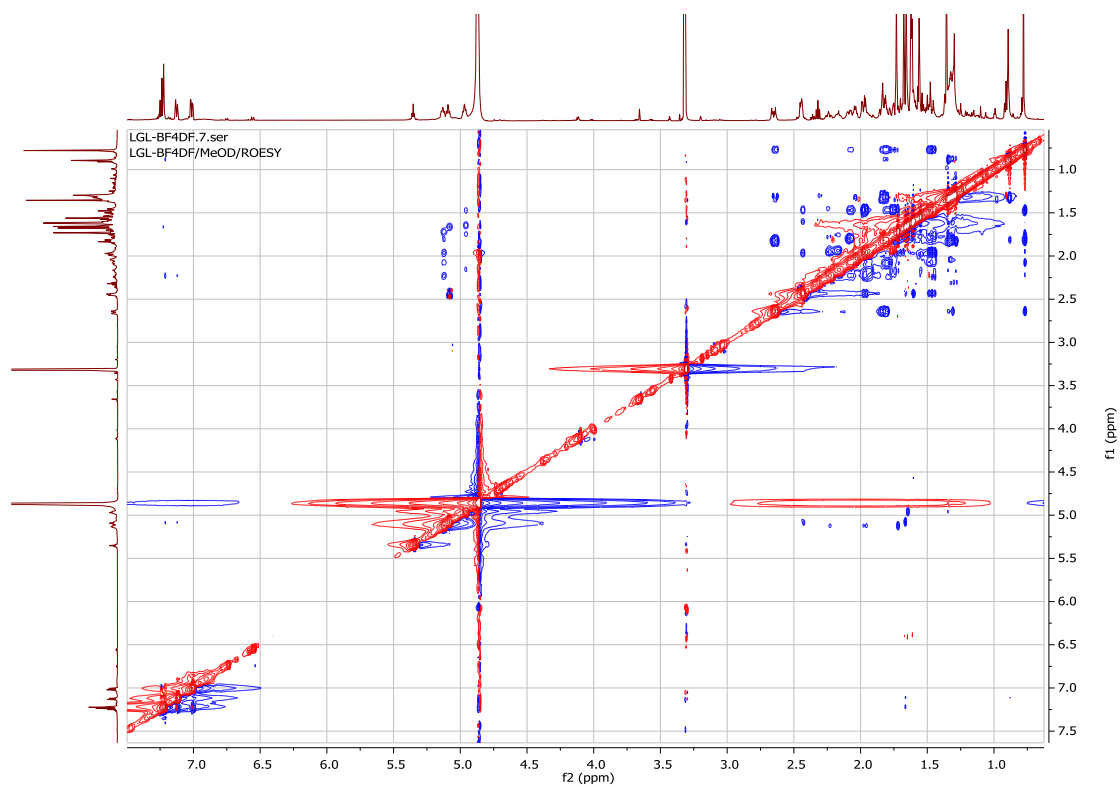

**Figure S78.** IR spectrum of multiflorone I (**8**)

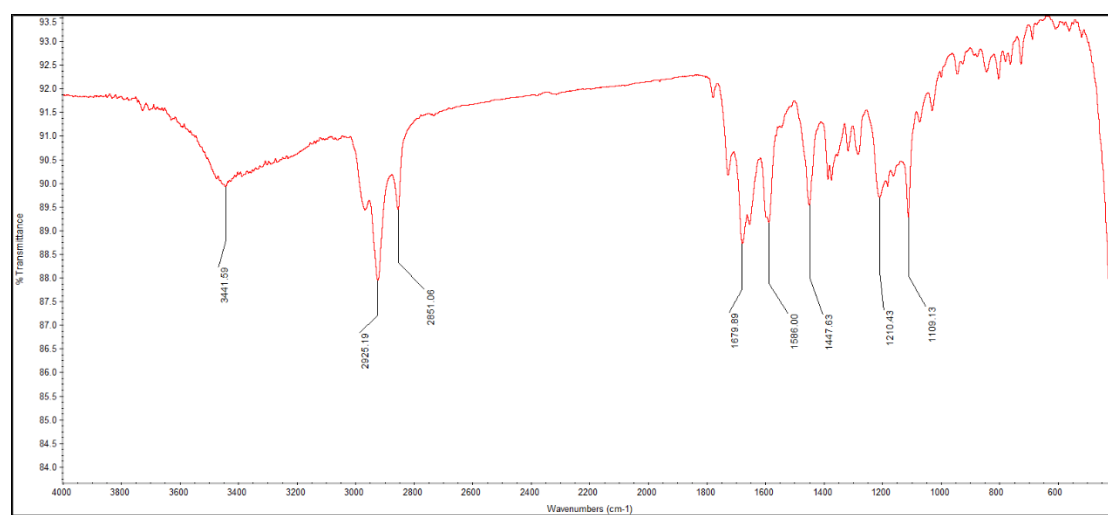

Figure S79. UV spectrum of multiflorone I (8)

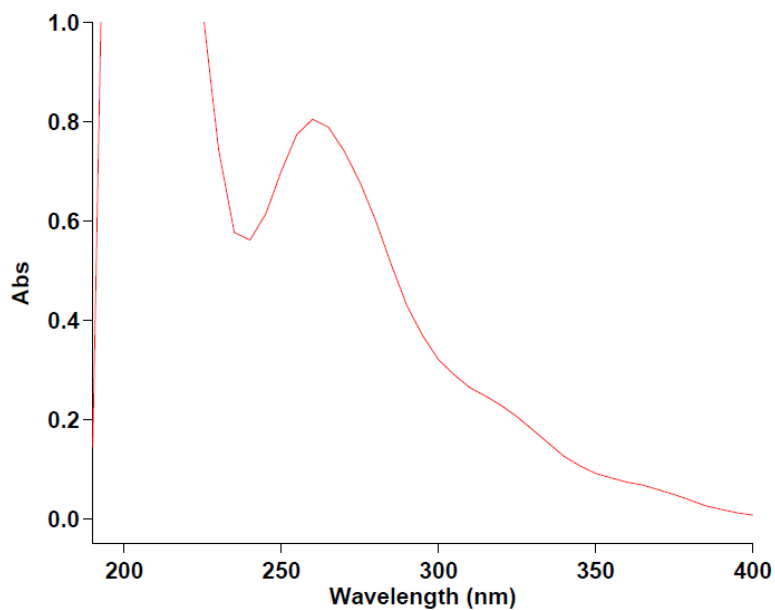

Figure S80. HRESIMS spectrum of multiflorone I (8)

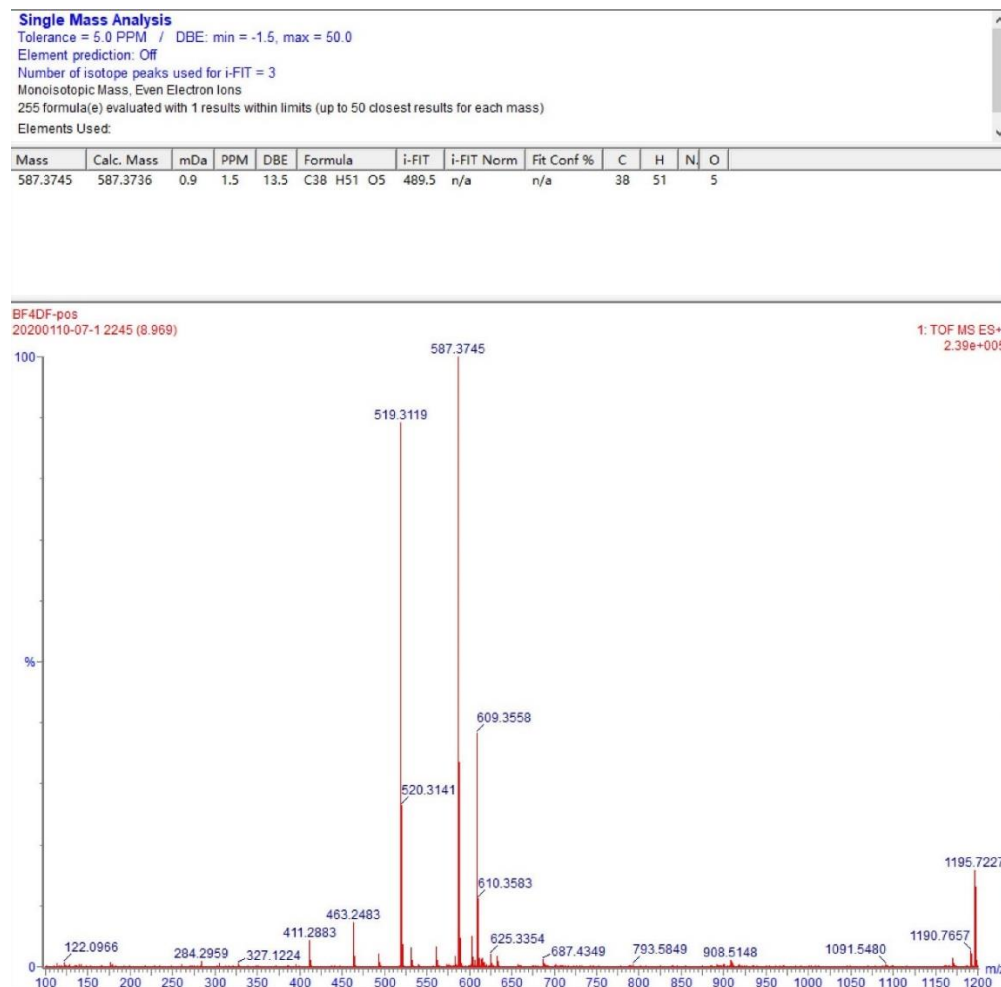

Figure S81. ECD spectrum of multiflorone I (8)

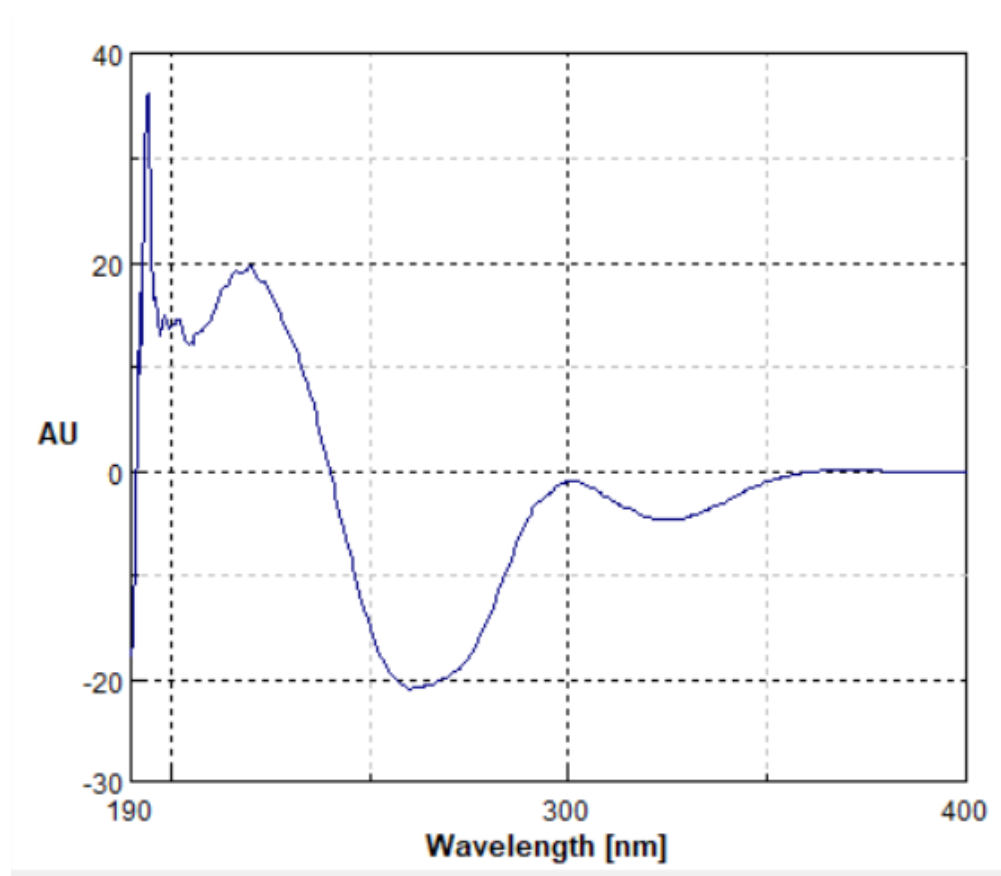

Figure S82. <sup>1</sup>H NMR spectrum of garciniagifolone F (9) in MeOD

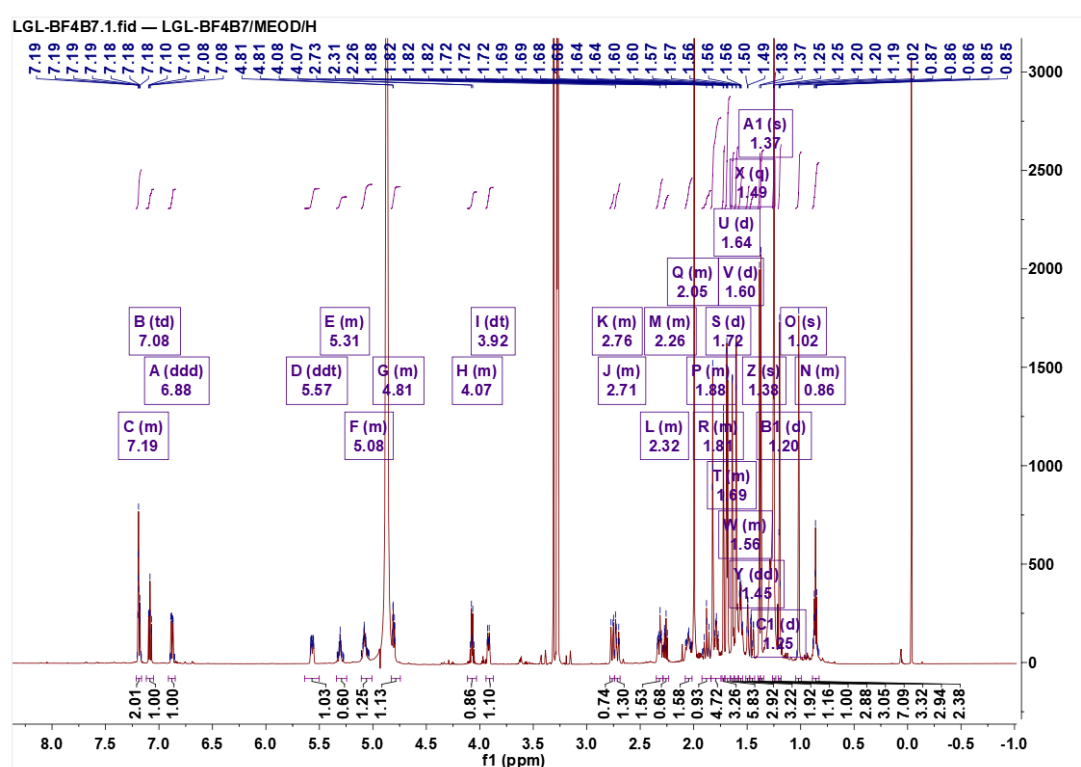

**Figure S83.**  $^{13}\text{C}$  NMR spectrum of garciniagifolone F (9) in MeOD

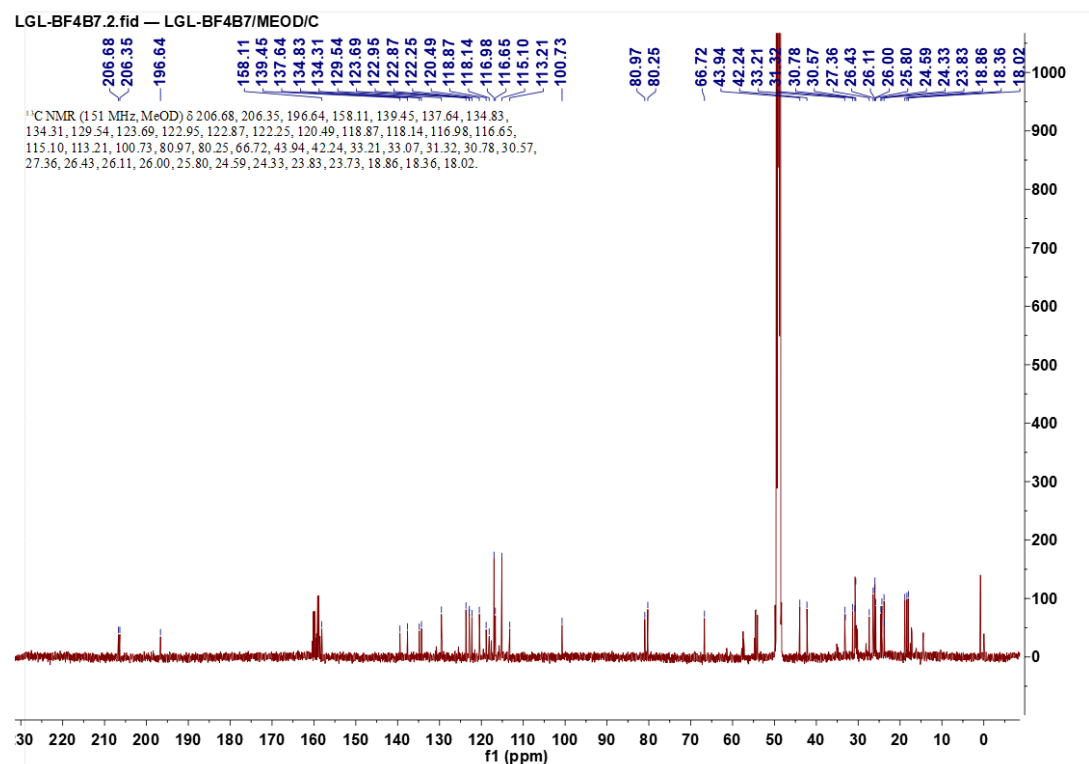

**Figure S84.** DEPT 135 spectrum of garciniagifolone F (9) in MeOD

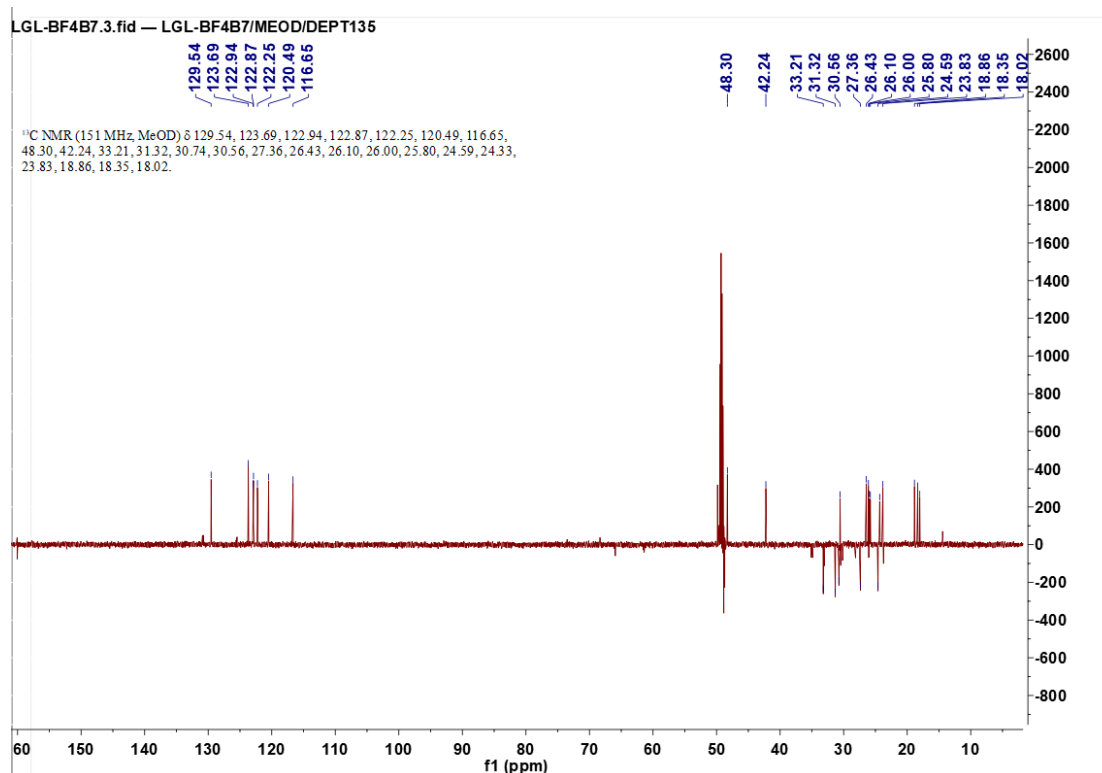

Figure S85. HSQC spectrum of garciniagifolone F (9) in MeOD

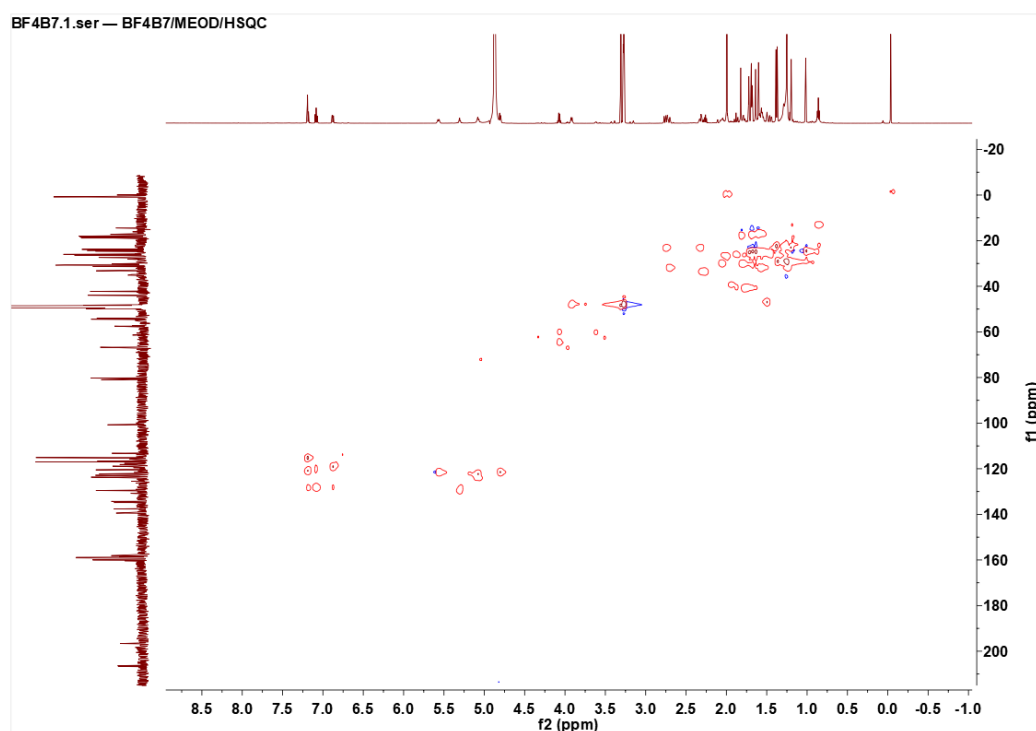

Figure S86. HMBC spectrum of garciniagifolone F (9) in MeOD

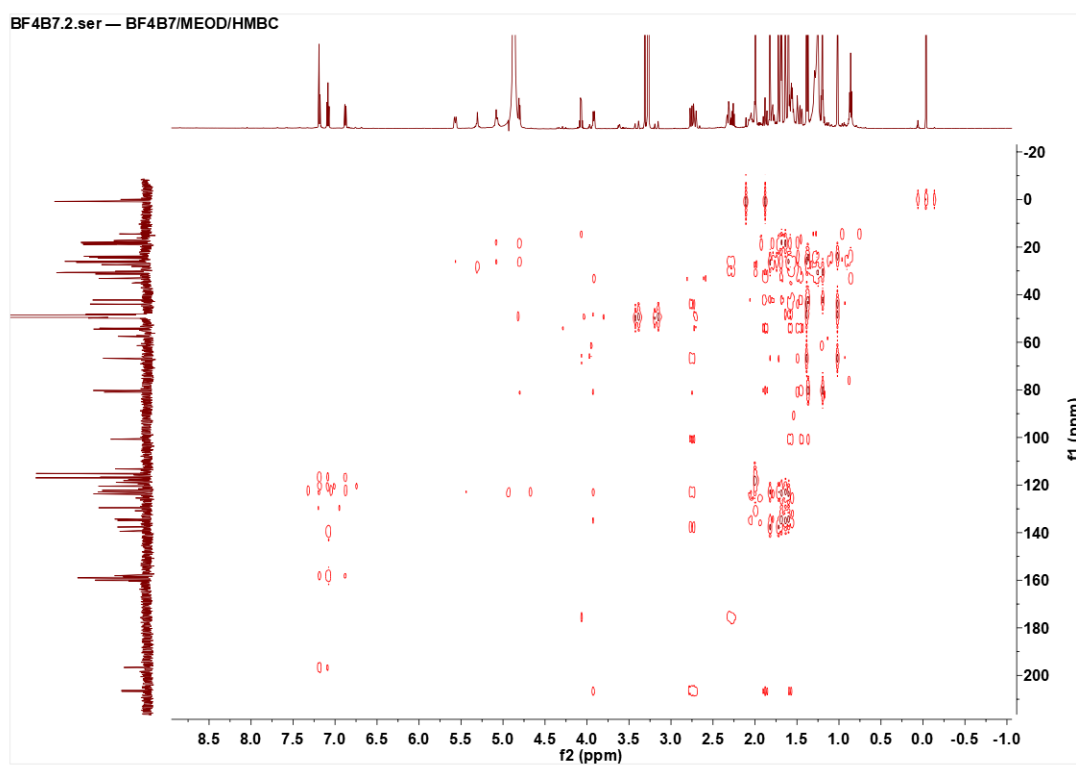

**Figure S87.** ROESY spectrum of garciniagifolone F (9) in MeOD

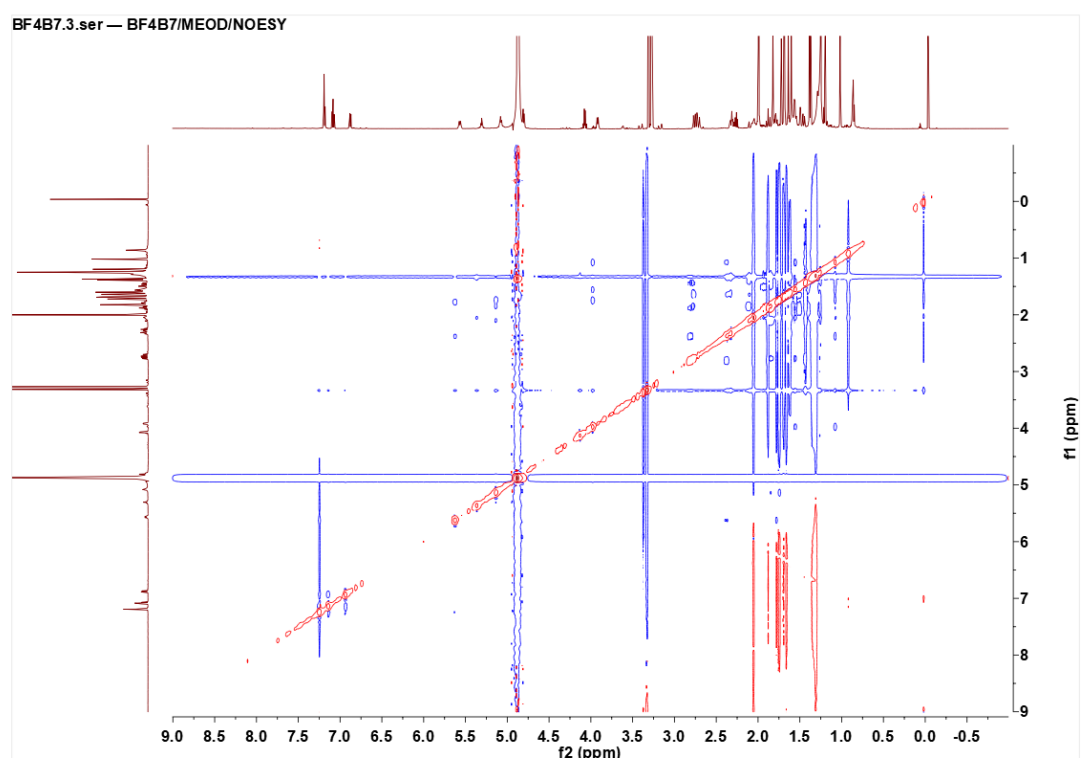

**Figure S88.** IR spectrum of garciniagifolone F (9)

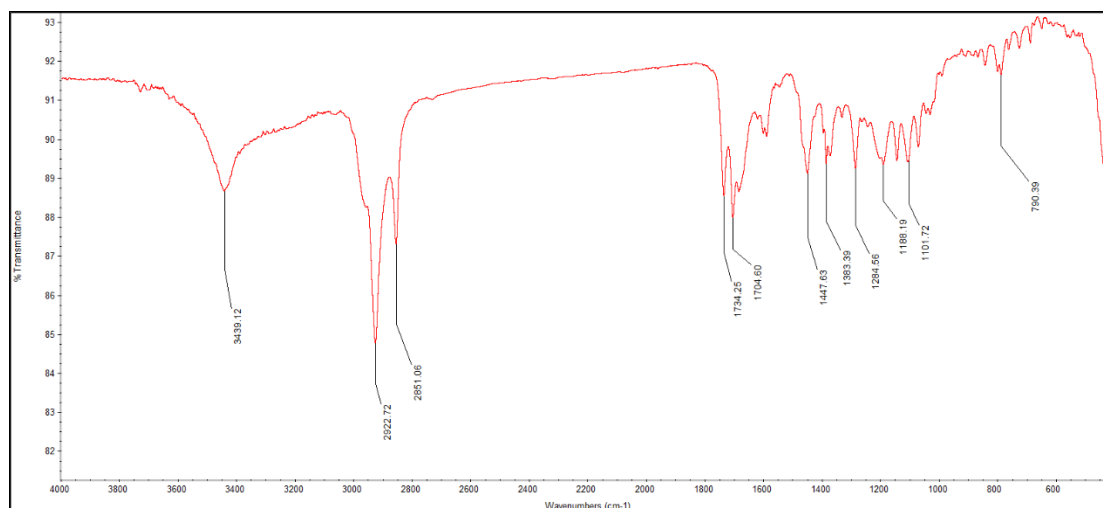

**Figure S89.** UV spectrum of garciniagifolone F (9)

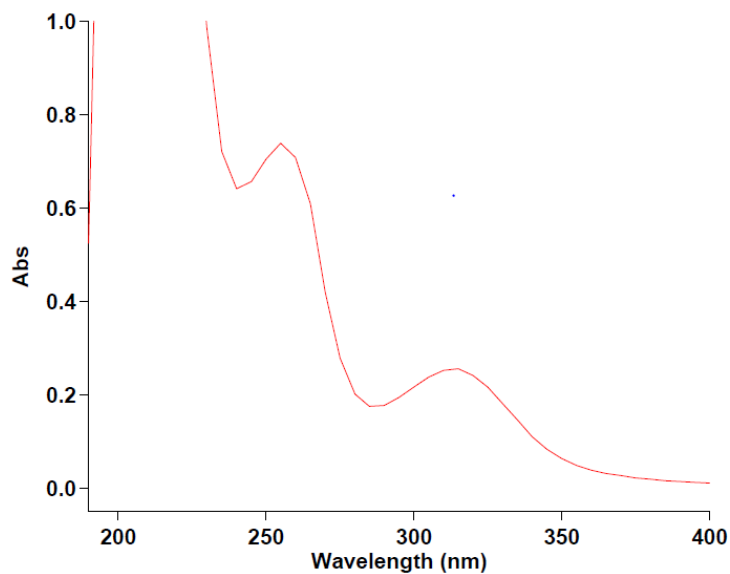

**Figure S90.** HRESIMS spectrum of garciniagifolone F (9)

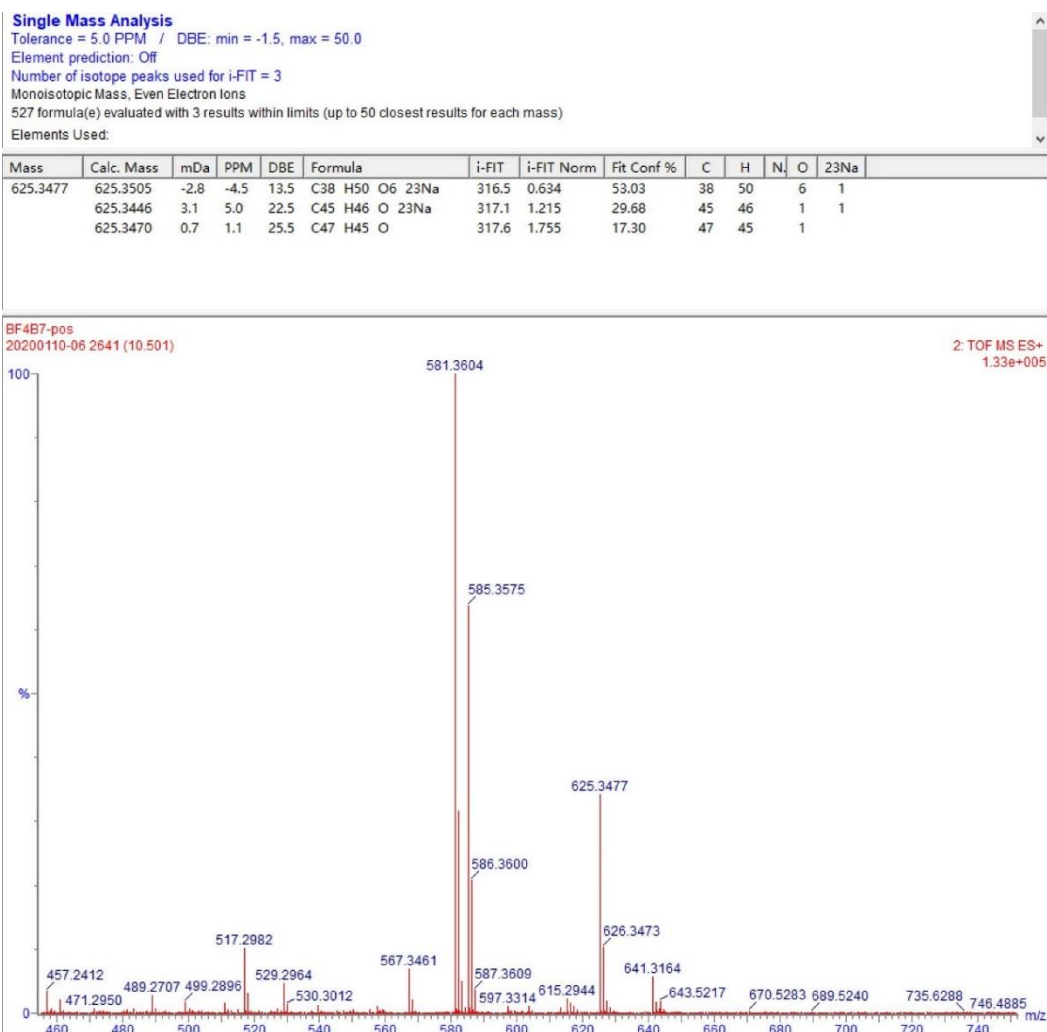





**Figure S93.**  $^{13}\text{C}$  NMR spectrum of 36-hydroxy-garciniagifolone F (**10**) in MeOD

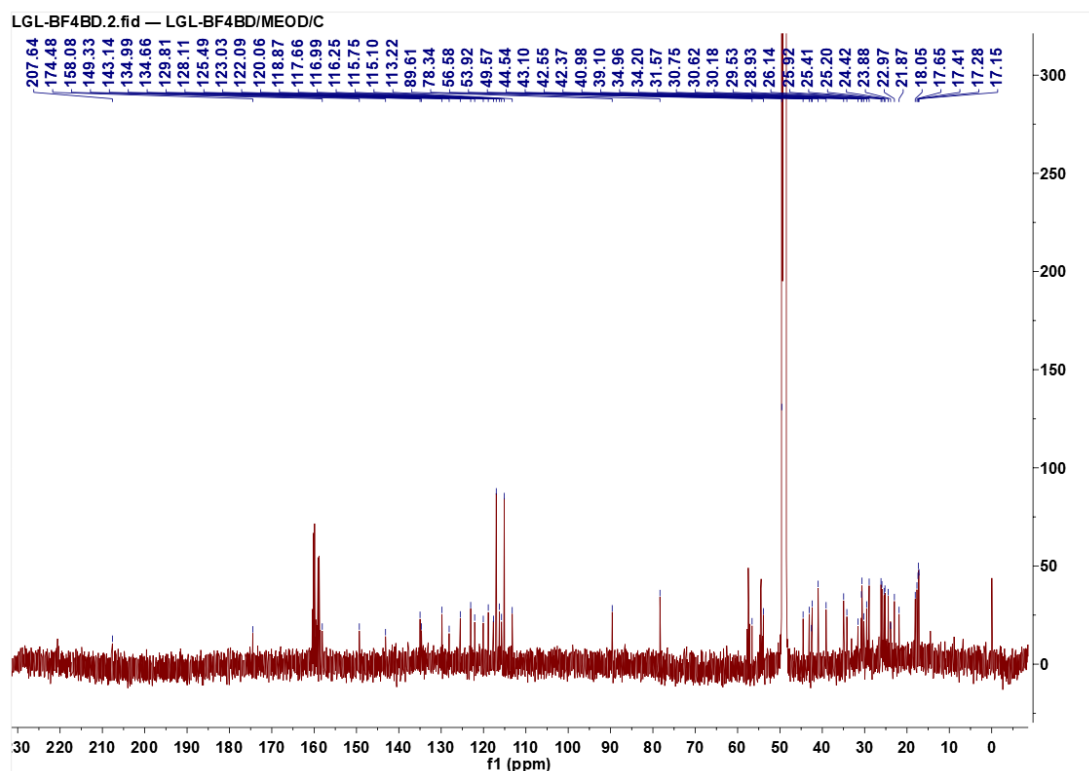

**Figure S94.** DEPT 135 spectrum of 36-hydroxy-garciniagifolone F (**10**) in MeOD

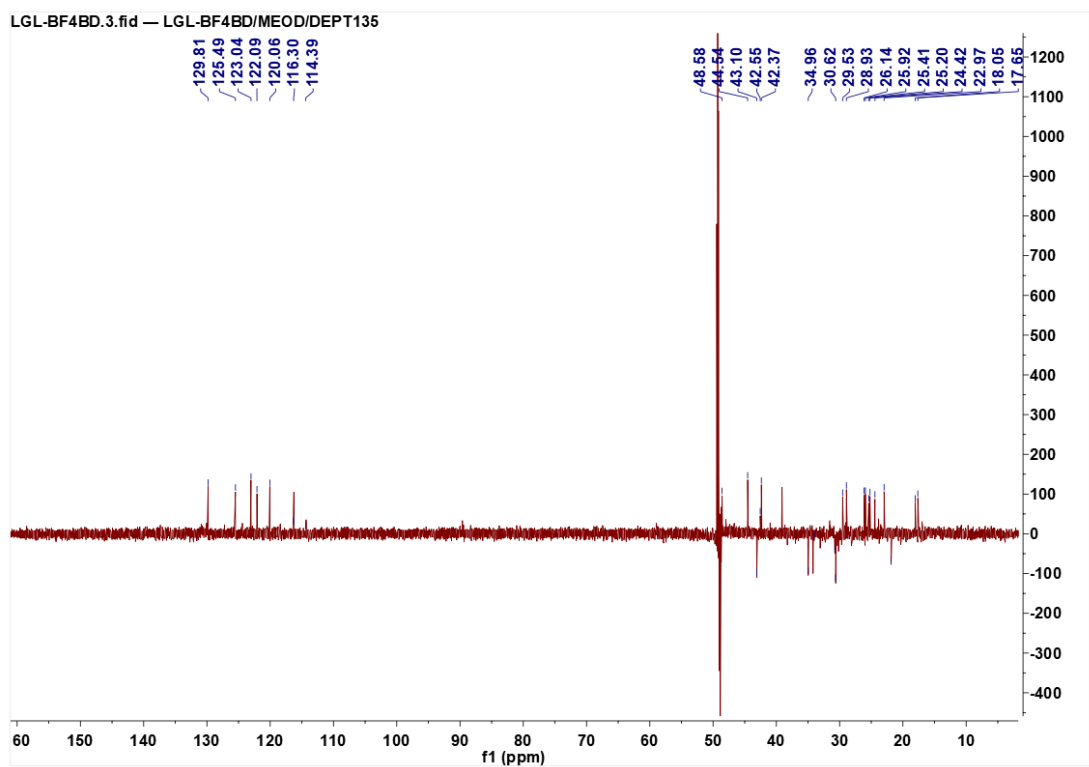

Figure S95. HSQC spectrum of 36-hydroxy-garciniagifolone F (**10**) in MeOD

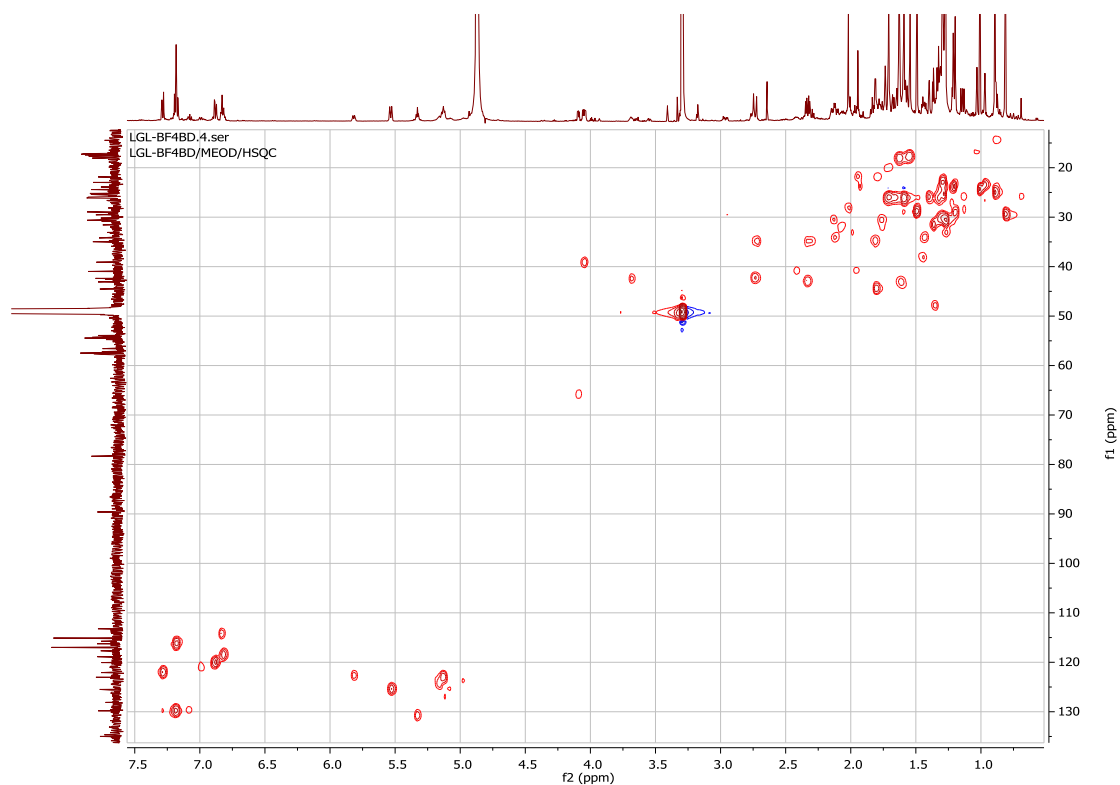

Figure S96. HMBC spectrum of 36-hydroxy-garciniagifolone F (**10**) in MeOD

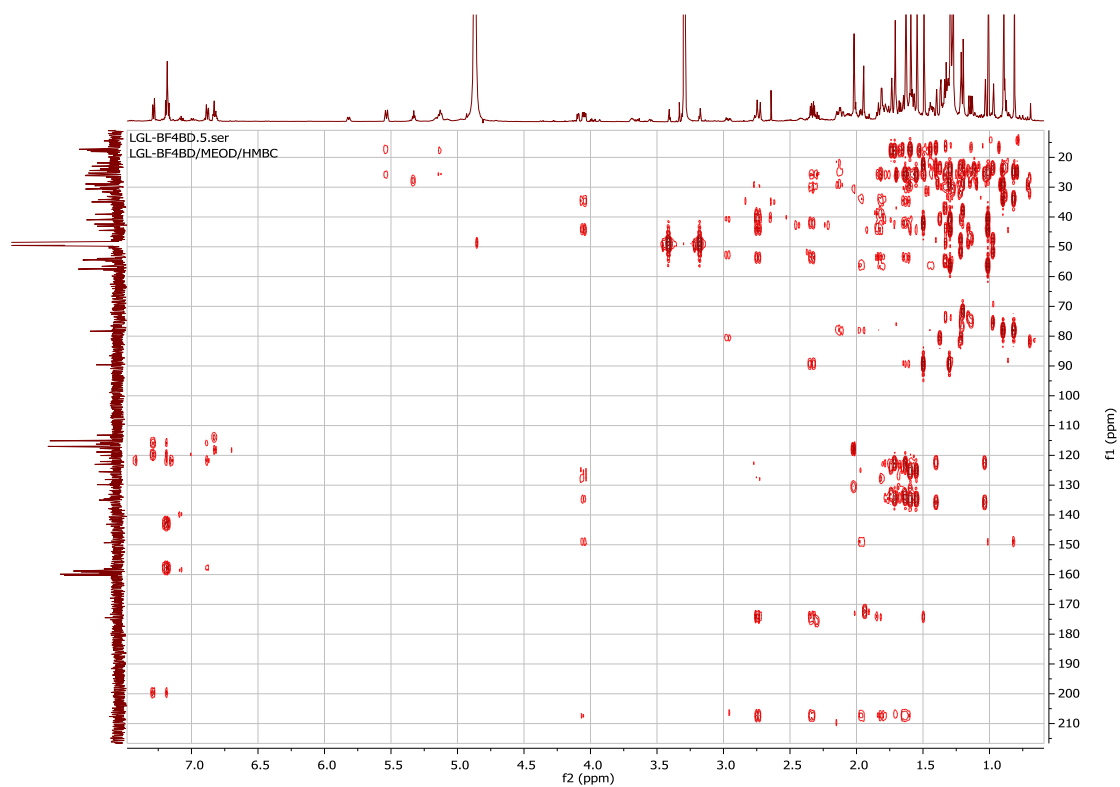

**Figure S97.** ROESY spectrum of 36-hydroxy-garciniagifolone F (**10**) in MeOD

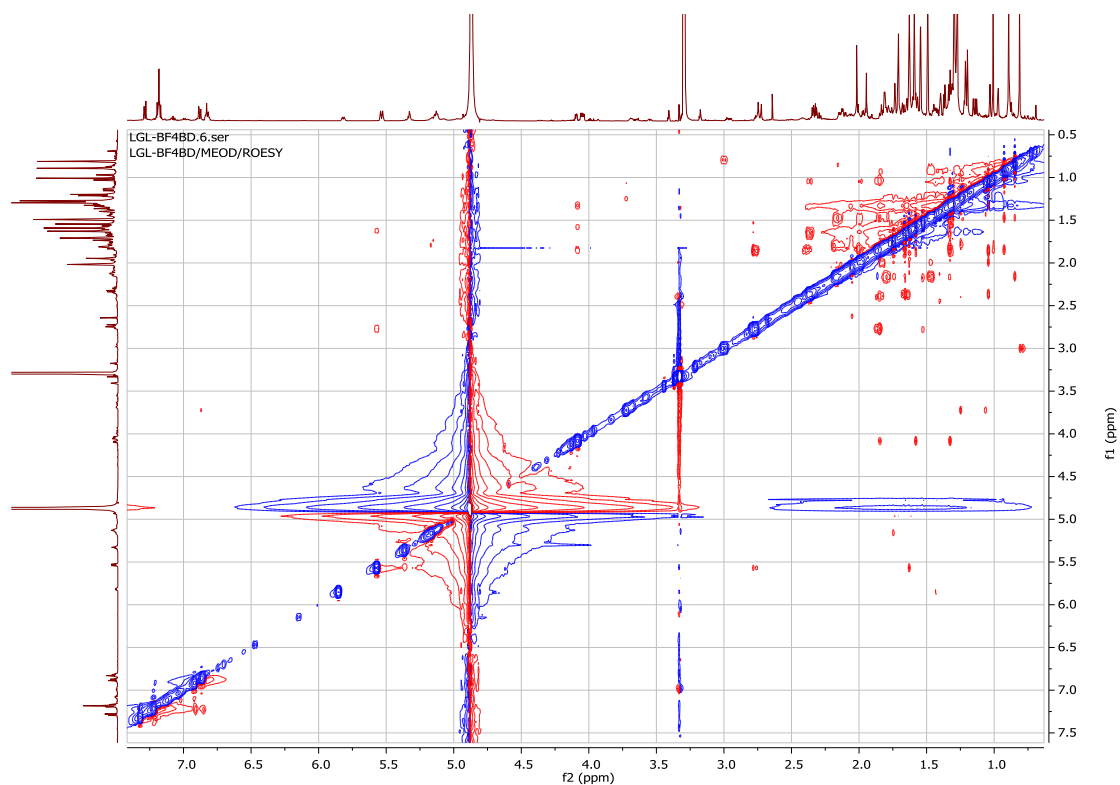

**Figure S98.** IR spectrum of 36-hydroxy-garciniagifolone F (**10**)

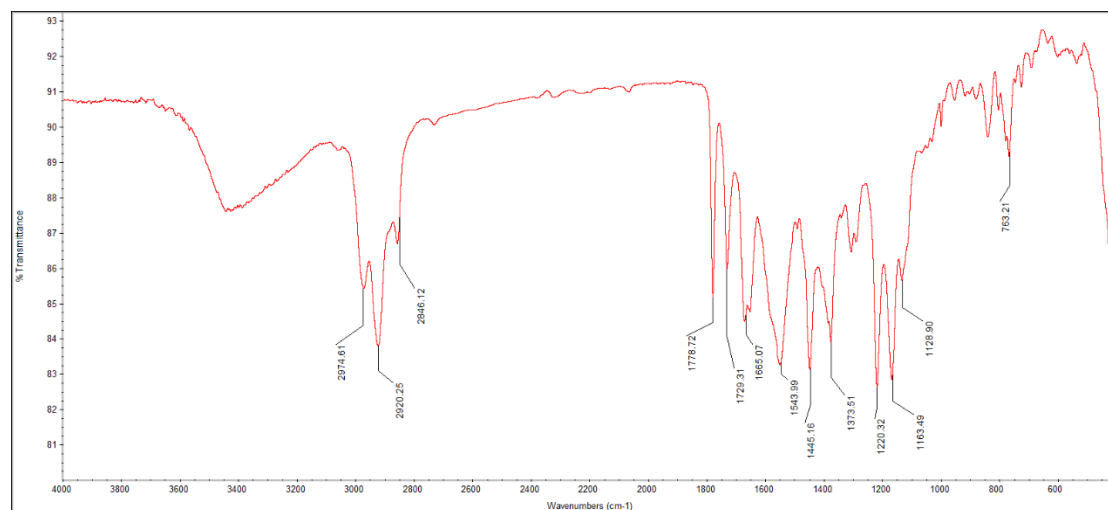

Figure S99. UV spectrum of 36-hydroxy-garciniagifolone F (10)

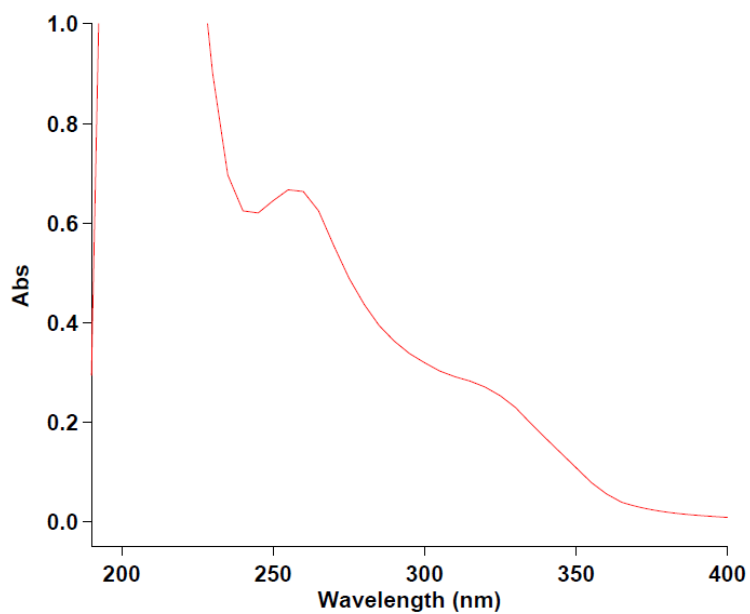

Figure S100. HRESIMS spectrum of 36-hydroxy-garciniagifolone F (10)

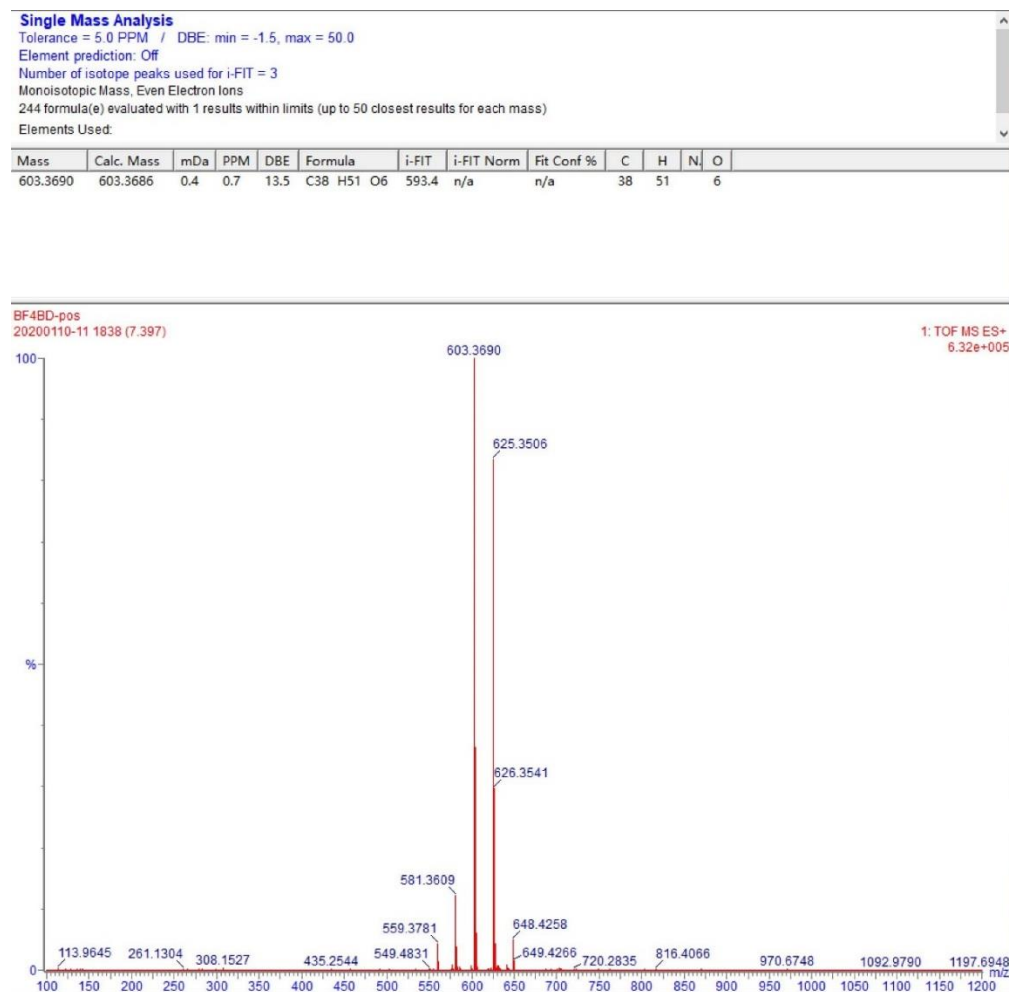

Figure S101. ECD spectrum of 36-hydroxy-garciniagifolone F (10)

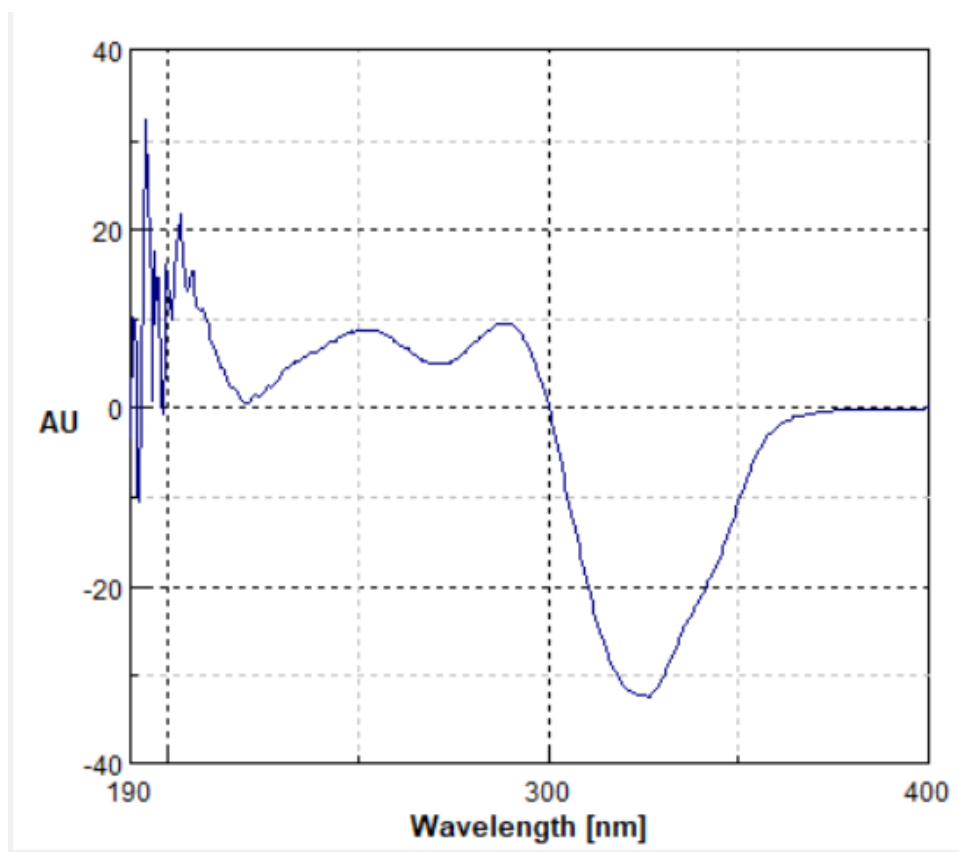

Figure S102. Preparative-HPLC program image of BA2

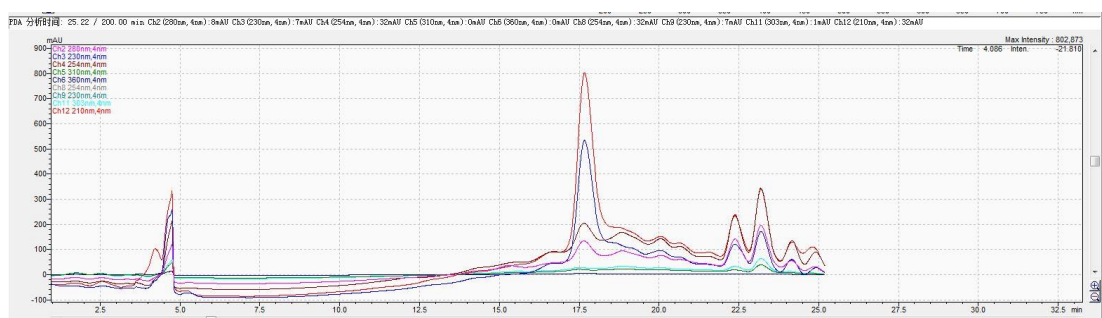

Figure S103. Preparative-HPLC program image of BF2

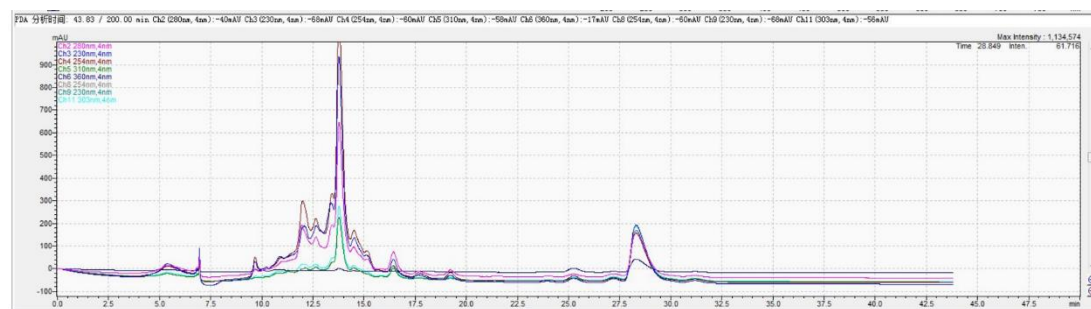

Figure S104. Preparative-HPLC program image of BF3

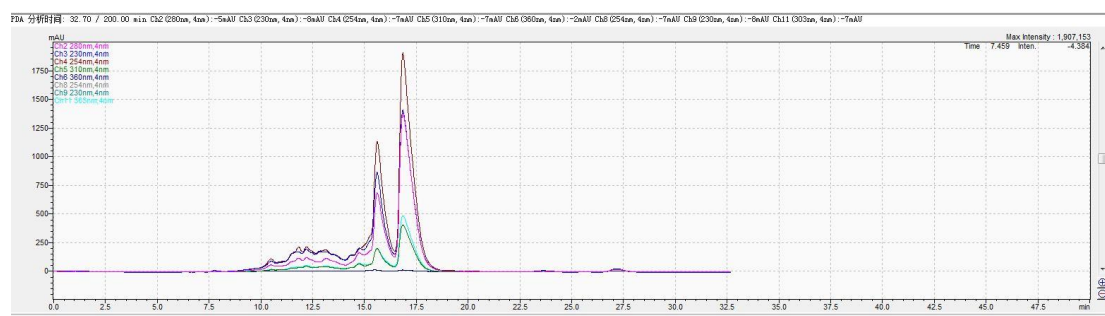

Figure S105. Preparative-HPLC program image of BF4B

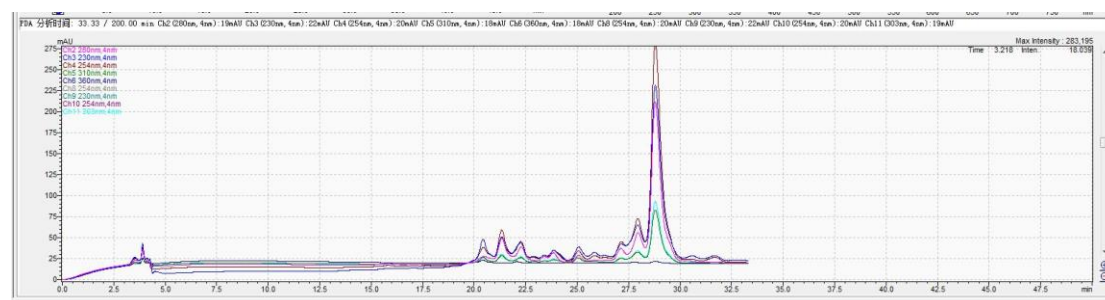

Figure S106. Preparative-HPLC program image of BF4D

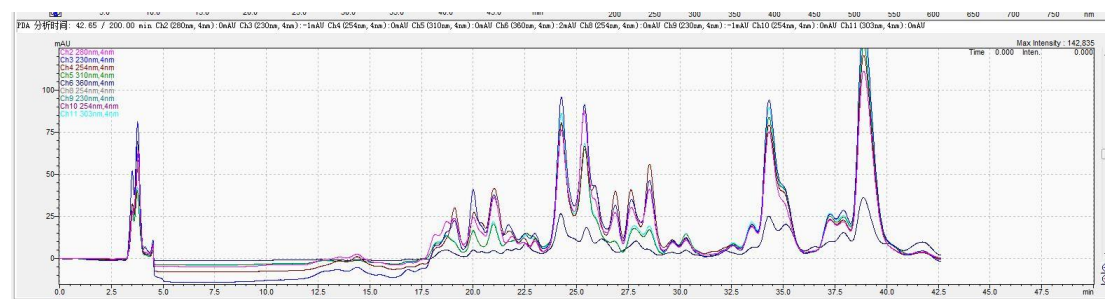

Figure S107. Preparative-HPLC program image of GD

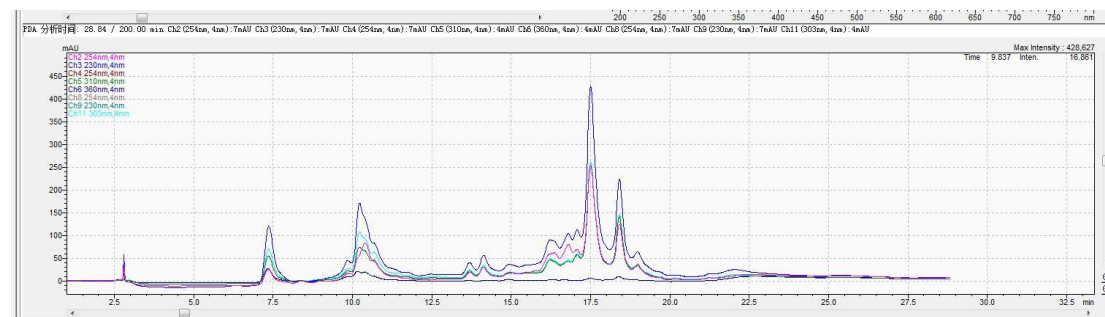

Supplement: d1fo00972a1.pdf [file d1fo00972a1.pdf]
