# Supplementary figures and images for: Polyisoprenylated benzophenone derivatives from Garcinia cambogia and their anti-inflammatory activities
Source: Royal Society of Chemistry journal article supplement (doi:10.1039/d1fo00972a), 2021-01-01

### Uncropped blots for Figure 2D

iNOS

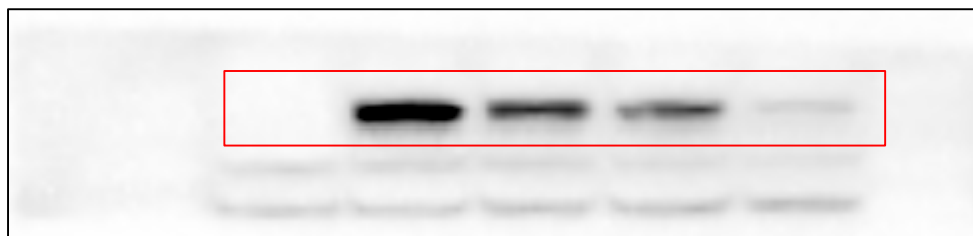

GAPDH

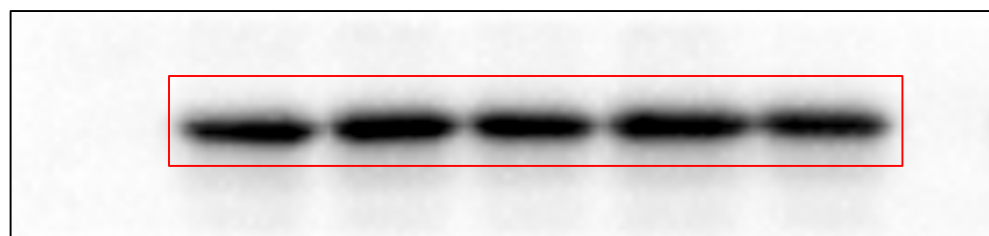

**Uncropped blots for Figure 2H**

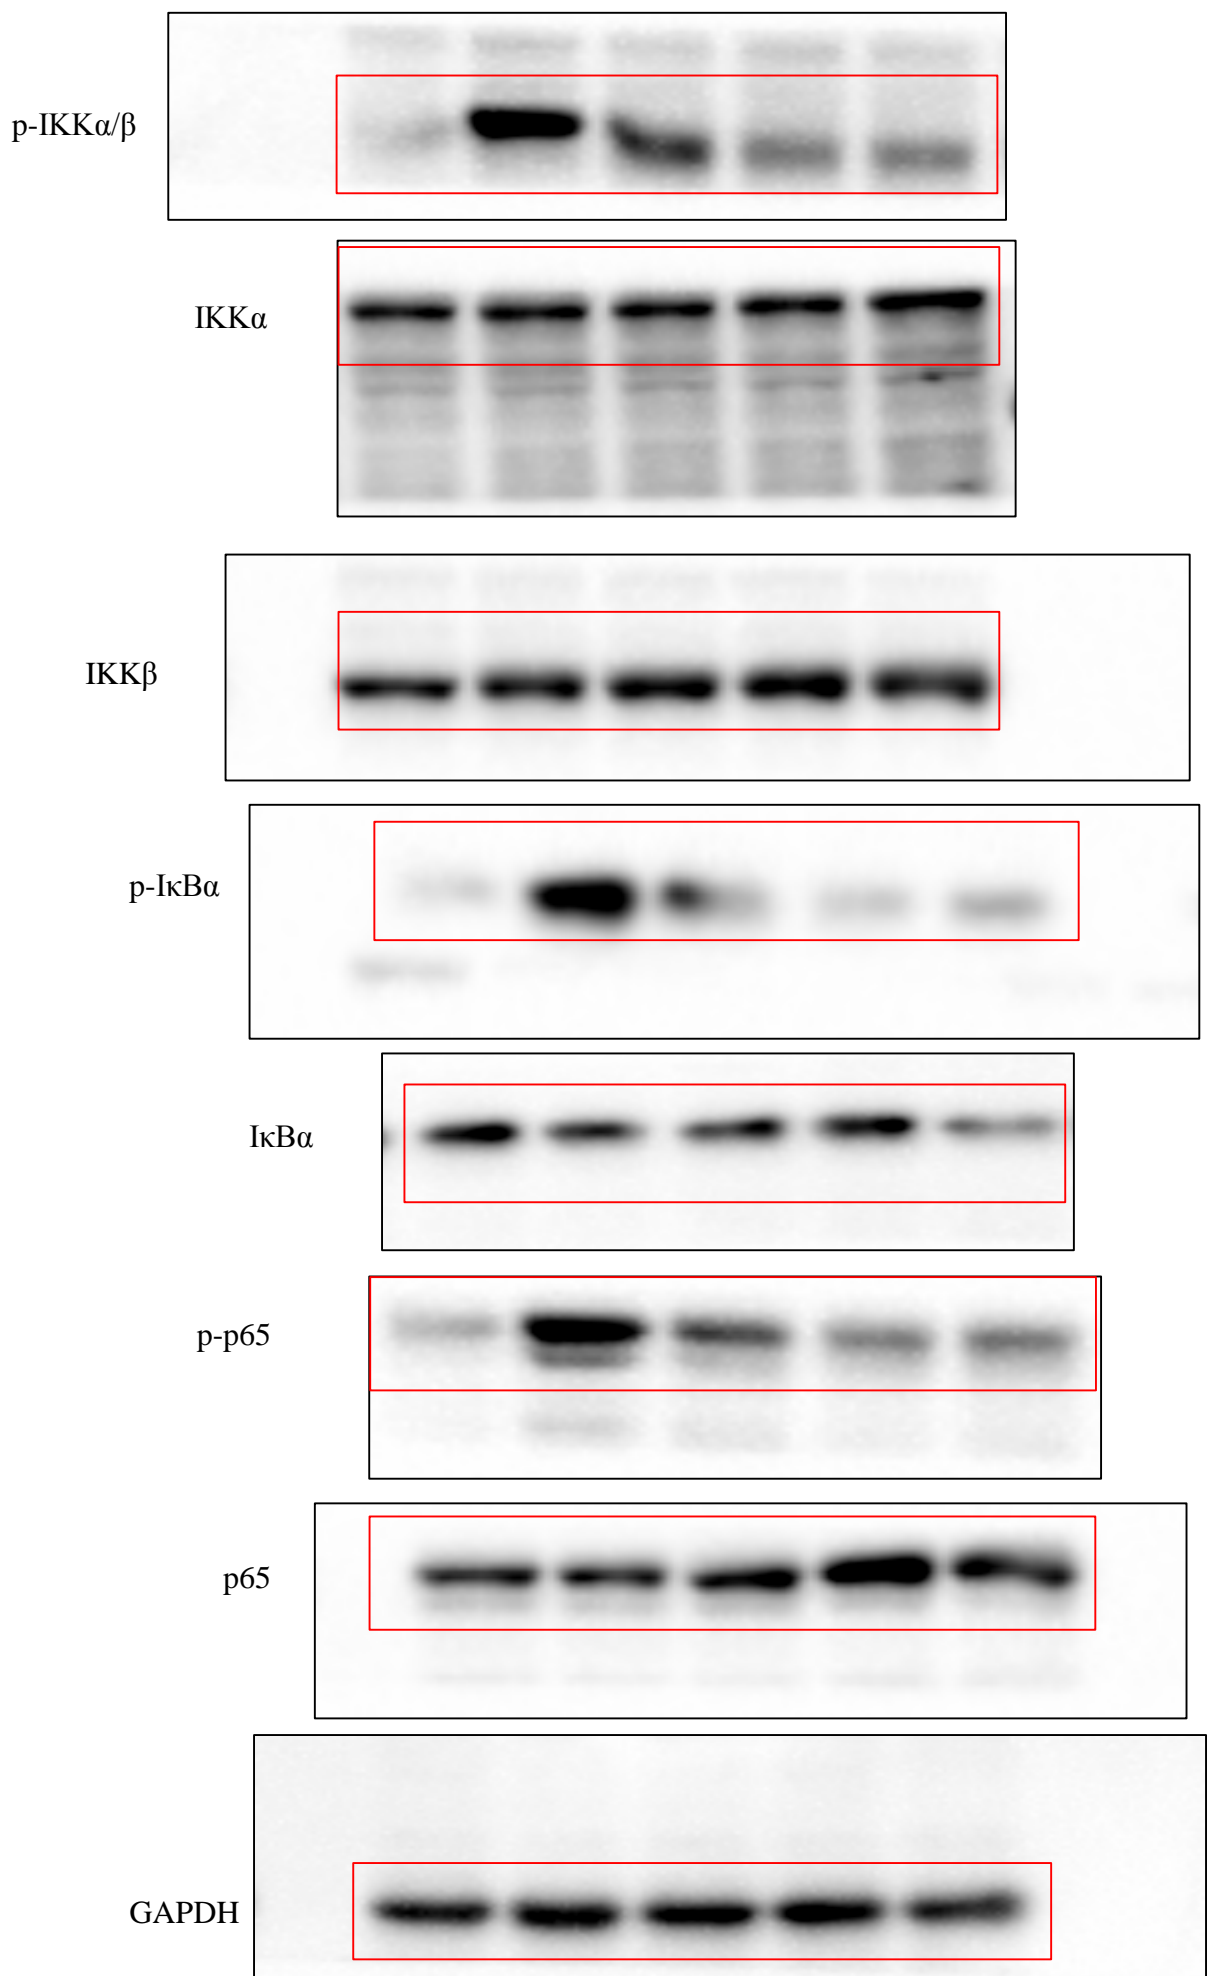

Supplement: d1fo00972a2.pdf [file d1fo00972a2.pdf]
